# Supplementary material for: Carboxyl radical-assisted 1,5-aryl migration through Smiles rearrangement
Source: Royal Society of Chemistry journal article supplement (doi:10.1039/c6ob01758d), 2016-01-01

## Supporting Information

### Carboxyl Radical-Assisted 1,5-Aryl Migration through Smiles Rearrangement

Asik Hossian, and Ranjan Jana\*

Organic and Medicinal Chemistry Division, CSIR-Indian Institute of Chemical Biology,

4 Raja S. C. Mullick Road, Jadavpur, Kolkata-700032, West Bengal, India

Academy of Scientific and Innovative Research (AcSIR), Kolkata-700032, West Bengal, India

Fax: (+91) 33 2473 5197; E-mail: rjana@iicb.res.in

### Table of Contents

|                                                                     |         |
|---------------------------------------------------------------------|---------|
| Preparation of Starting Materials.....                              | S2-S8   |
| Optimization Details.....                                           | S9-S11  |
| Large Scale Reaction.....                                           | S11     |
| The ESI mass data of the crude standard reaction mixture.....       | S12     |
| Control Experiments.....                                            | S13-S15 |
| The Selective Reduction of Disulfide bond ( <b>4a</b> ).....        | S15-S16 |
| The Hydrolysis of Phenyl 2-hydroxybenzoate ester ( <b>2a</b> )..... | S16     |
| Crystal Structure of Compound <b>2t</b> (Scheme 2).....             | S16-S17 |
| References.....                                                     | S18     |
| <sup>1</sup> H NMR and <sup>13</sup> C NMR spectra.....             | S19-S76 |

### Preparation of 4-Fluoro-2-phenoxybenzoic acid, 1o, Scheme 2.<sup>1</sup>

A mixture of 2-chloro-4-fluorobenzoic acid (873 mg, 5.0 mmol, 1.0 equiv), phenol (940 mg, 10 mmol, 2.0 equiv), K<sub>2</sub>CO<sub>3</sub> (1.4 g, 10 mmol, 2.0 equiv), pyridine (0.4 mL, 5.0 mmol, 1.0 equiv), Cu powder (50 mg) and CuI (50 mg) in 5.0 mL H<sub>2</sub>O was taken in a 50 mL round bottom flask. The reaction mixture was kept at reflux for 6 h. The mixture was then basified with Na<sub>2</sub>CO<sub>3</sub> solution and extracted with Et<sub>2</sub>O once and the aqueous phase was acidified with HCl. The resulting precipitates were extracted with dichloromethane (60 mL) and water (50 mL). The organic layer was washed with water (20 mL x 2) and brine (10 mL), dried over anhydrous Na<sub>2</sub>SO<sub>4</sub> and the solvent was evaporated under reduced pressure. The crude product was purified by column chromatography (SiO<sub>2</sub>, eluting with 6:4 hexane/ethyl acetate) afforded the desired product as a white solid, (697 mg, 60%), mp 102-104 °C. <sup>1</sup>H NMR (600 MHz, DMSO-d<sub>6</sub>): δ 7.93 (td, *J* = 8.4 Hz, 1.8 Hz, 1H), 7.38 (t, *J* = 7.2 Hz, 2H), 7.09-7.15 (m, 2H), 6.97 (d, *J* = 7.8 Hz, 2H), 6.81 (d, *J* = 10.2 Hz, 1H); <sup>13</sup>C NMR (150 MHz, DMSO-d<sub>6</sub>): δ 166.0, 165 (d, *J* = 250.5 Hz), 157.5 (d, *J* = 10.5 Hz), 157.0, 134.3 (d, *J* = 10.5 Hz), 130.5, 124.0, 120.9 (d, *J* = 3.0 Hz), 118.5, 111.4 (d, *J* = 22.5 Hz), 108.2 (d, *J* = 25.5 Hz).

### Preparation of 2-(*p*-Tolyloxy)-4-fluorobenzoic acid, 1p, Scheme 2.<sup>1</sup>

A mixture of 2-chloro-4-fluorobenzoic acid (873 mg, 5.0 mmol, 1.0 equiv), *p*-cresol (1.0 mL, 10 mmol, 2.0 equiv), K<sub>2</sub>CO<sub>3</sub> (1.4 g, 10 mmol, 2.0 equiv), pyridine (0.4 mL, 5.0 mmol, 1.0 equiv), Cu powder (50 mg) and CuI (50 mg) in 5.0 mL H<sub>2</sub>O was taken in a 50 mL round bottom flask. The reaction mixture was kept at reflux for 6 h. The mixture was then basified with Na<sub>2</sub>CO<sub>3</sub> solution and extracted with Et<sub>2</sub>O once and the aqueous phase was acidified with HCl. The resulting precipitates were extracted with dichloromethane (60 mL) and water (50 mL). The organic layer was washed with water (20 mL x 2) and brine (10 mL), dried over anhydrous Na<sub>2</sub>SO<sub>4</sub> and the solvent was evaporated under reduced pressure. The crude product was purified by column chromatography (SiO<sub>2</sub>, eluting with 6:4 hexane/ethyl acetate) afforded the desired product as a white solid, (690 mg, 56%), mp 108-110 °C. <sup>1</sup>H NMR (600 MHz, DMSO-d<sub>6</sub>): δ 12.93 (brs, 1H), 7.90 (t, *J* = 7.8 Hz, 1H), 7.20 (d, *J* = 8.4 Hz, 2H), 7.06 (td, *J* = 8.4 Hz, 1.8 Hz, 1H), 6.89 (d, *J* = 8.4 Hz, 2H), 6.71 (dd, *J* = 10.2 Hz, 1.8 Hz, 1H), 2.28 (s, 3H); <sup>13</sup>C NMR (150 MHz, DMSO-d<sub>6</sub>): δ 166.1, 164.9 (d, *J* = 250.5 Hz), 158.2 (d, *J* = 10.5 Hz), 154.5, 134.2 (d, *J* = 10.5 Hz), 133.4, 130.9, 120.5 (d, *J* = 3.0 Hz), 118.9, 110.8 (d, *J* = 21.0 Hz), 107.3 (d, *J* = 24.0

Hz), 20.7; IR (neat):  $\nu_{\max}$  1675, 1597, 1440, 1258, 851, 770  $\text{cm}^{-1}$ ; HRMS (ESI,  $m/z$ ) calcd. for  $\text{C}_{14}\text{H}_{11}\text{FO}_3\text{Na}$   $[\text{M} + \text{Na}]^+$ : 269.0590; found: 269.0585.

### Preparation of 4-Fluoro-2-(naphthalen-3-yloxy)benzoic acid, 1q, Scheme 2.<sup>1</sup>

A mixture of 2-chloro-4-fluorobenzoic acid (873 mg, 5.0 mmol, 1.0 equiv), naphthalen-2-ol (1.4 g, 10 mmol, 2.0 equiv),  $\text{K}_2\text{CO}_3$  (1.4 g, 10 mmol, 2.0 equiv), pyridine (0.4 mL, 5.0 mmol, 1.0 equiv), Cu powder (50 mg) and CuI (50 mg) in 5.0 mL  $\text{H}_2\text{O}$  was taken in a 50 mL round bottom flask. The reaction mixture was kept at reflux for 6 h. The mixture was then basified with  $\text{Na}_2\text{CO}_3$  solution and extracted with  $\text{Et}_2\text{O}$  once and the aqueous phase was acidified with HCl. The resulting precipitates were extracted with dichloromethane (60 mL) and water (50 mL). The organic layer was washed with water (20 mL x 2) and brine (10 mL), dried over anhydrous  $\text{Na}_2\text{SO}_4$  and the solvent was evaporated under reduced pressure. The crude product was purified by column chromatography ( $\text{SiO}_2$ , eluting with 6:4 hexane/ethyl acetate) afforded the desired product as a white solid, (819 mg, 58%), mp 178-180  $^\circ\text{C}$ .  $^1\text{H}$  NMR (600 MHz,  $\text{DMSO-d}_6$ ):  $\delta$  7.96-7.99 (m, 2H), 7.91 (d,  $J = 8.4$  Hz, 1H), 7.82 (d,  $J = 8.4$  Hz, 1H), 7.48 (t,  $J = 8.4$  Hz, 1H), 7.44 (t,  $J = 7.2$  Hz, 1H), 7.28-7.30 (m, 2H), 7.17 (td,  $J = 9.0$  Hz, 2.4 Hz, 1H), 6.97 (dd,  $J = 10.2$  Hz, 2.4 Hz, 1H);  $^{13}\text{C}$  NMR (150 MHz,  $\text{DMSO-d}_6$ ):  $\delta$  165.9, 165.1 (d,  $J = 250.5$  Hz), 157.3 (d,  $J = 10.5$  Hz), 155.2, 134.4 (d,  $J = 10.5$  Hz), 134.3, 130.5, 130.2, 128.1, 127.5, 127.1, 125.3, 121.1 (d,  $J = 4.5$  Hz), 119.7, 113.1, 111.8 (d,  $J = 22.5$  Hz), 109.4 (d,  $J = 24.0$  Hz); IR (neat):  $\nu_{\max}$  1681, 1603, 1429, 1293, 1232, 768, 609  $\text{cm}^{-1}$ ; HRMS (ESI,  $m/z$ ) calcd. for  $\text{C}_{17}\text{H}_{11}\text{FO}_3\text{Na}$   $[\text{M} + \text{Na}]^+$ : 305.0590; found: 305.0591.

### Preparation of 2-(Naphthalen-1-yloxy)benzoic acid, 1j, Scheme 2.<sup>1</sup>

A mixture of 2-ethyliodobenzoate (2.76 g, 10 mmol, 1.0 equiv), 1-naphthol (1.73 g, 12 mmol, 1.2 equiv),  $\text{K}_2\text{CO}_3$  (1.8 g, 13 mmol, 1.3 equiv), Cu powder (0.32 g, 5.0 mmol, 0.5 equiv) and KI (830 mg, 5.0 mmol, 0.5 equiv) in 20 mL DMF was taken in a 100 mL round bottom flask. The reaction mixture was stirred at 110  $^\circ\text{C}$  for 24 h under nitrogen atmosphere. Then the reaction mixture was quenched through the addition of  $\text{H}_2\text{O}$  and the mixture was extracted with ethyl acetate three times. The combined organic layers were dried over  $\text{Na}_2\text{SO}_4$  and the solvent was removed under reduced pressure. The crude product was purified by column chromatography (silica gel, hexane/ ethyl acetate = 9/1) to obtain the pure desired ethyl 2-(naphthalen-1-

loxy)benzoate in 23% (672 mg) yield as a colorless oil. Then the pure ethyl 2-(naphthalen-1-ylloxy)benzoate (0.6 g, 2.05 mmol) was dissolved in a solution of 0.75 g NaOH in 10 mL H<sub>2</sub>O and 10 mL MeOH and stirred at room temperature for 6 h. The reaction mixture was then acidified with 6N HCl. The resulting precipitates were extracted with dichloromethane (50 mL) and water (40 mL). The organic layer was washed with water (20 mL x 2) and brine (10 mL), dried over anhydrous Na<sub>2</sub>SO<sub>4</sub> and the solvent was evaporated under reduced pressure. The crude product was purified by column chromatography using silica gel, hexane/ ethyl acetate = 7/3 as eluent to afford the desired white solid product 80% (435 mg) yield, mp 131-133 °C. <sup>1</sup>H NMR (600 MHz, DMSO-d<sub>6</sub>): δ 8.17 (d, *J* = 8.4 Hz, 1H), 7.96 (d, *J* = 7.8 Hz, 1H), 7.89 (dd, *J* = 7.2 Hz, 1.2 Hz, 1H), 7.67 (d, *J* = 8.4 Hz, 1H), 7.52-7.59 (m, 3H), 7.42 (t, *J* = 7.8 Hz, 1H), 7.28 (t, *J* = 7.8 Hz, 1H), 6.97 (d, *J* = 7.8 Hz, 1H), 6.77 (d, *J* = 7.8 Hz, 1H); <sup>13</sup>C NMR (150 MHz, DMSO-d<sub>6</sub>): δ 167.0, 155.7, 153.4, 134.9, 134.0, 131.9, 128.2, 127.2, 126.54, 126.46, 126.0, 124.5, 124.4, 123.3, 122.0, 120.7, 112.2.

#### **Preparation of 4-Nitro-2-phenoxybenzoic acid, 1s, Scheme 2.**

To a stirred solution of 2-chloro-4-nitrobenzoic acid (1.50 g, 7.45 mmol, 1.0 equiv) and phenol (1.5 g, 16 mmol, 2.1 equiv) in MeOH (10 mL) was added a solution of NaOMe in MeOH (25 wt%, 5.0 mL, 20 mmol) under nitrogen atmosphere. After 15 minutes the solution was concentrated to dryness and the residue was taken up in dimethylacetamide (30 mL). Copper powder (50 mg) was added and the mixture was heated at 180 °C for 1 h under nitrogen atmosphere. The reaction mixture was cooled and acidified with 3N HCl until no more precipitate had formed. The resulting precipitates were extracted with dichloromethane (60 mL) and cold water (70 mL). The organic layer was washed with water (20 mL x 3) and brine (10 mL), dried over anhydrous Na<sub>2</sub>SO<sub>4</sub> and the solvent was evaporated under reduced pressure. The crude product was purified by column chromatography (SiO<sub>2</sub>, eluting with 95:5 dichloromethane /methanol) afforded the desired product as a white solid, (1.35 g, 70%), mp 161-163 °C. <sup>1</sup>H NMR (600 MHz, DMSO-d<sub>6</sub>): δ 8.01-8.05 (m, 2H), 7.62 (s, 1H), 7.45 (t, *J* = 7.2 Hz, 2H), 7.23 (t, *J* = 7.2 Hz, 1H), 7.09 (d, *J* = 7.8 Hz, 2H); <sup>13</sup>C NMR (150 MHz, DMSO-d<sub>6</sub>): δ 166.0, 156.2, 155.9, 150.2, 132.6, 130.8, 130.6, 124.9, 119.4, 118.5, 114.3; IR (neat): ν<sub>max</sub> 1699, 1546, 1350, 1242, 800 cm<sup>-1</sup>; HRMS (ESI, m/z) calcd. for C<sub>13</sub>H<sub>9</sub>NO<sub>5</sub>Na [M + Na]<sup>+</sup>: 282.0378; found: 282.0381.

### Preparation of 2-Phenoxy pyridine-3-carboxylic acid, 1w, Scheme 2.<sup>2</sup>

Ethyl 2-chloropyridine-3-carboxylate (1.5 g, 8.0 mmol, 1.0 equiv), phenol (1.5 g, 16 mmol, 2.0 equiv), anhydrous  $K_2CO_3$  (3.3 g, 24 mmol, 3.0 equiv) and solvent DMF (50 mL) were taken in a single necked round bottom flask fitted with a reflux condenser and heated to 100 °C for 10 h. The formation of ethyl 2-phenoxy pyridine-3-carboxylate was monitored by TLC. After the completion, the reaction mixture was cooled to room temperature. After that ice cold water was added to the reaction mixture and the product was extracted with ethyl acetate (20 x 2), the organic layer was washed with 10 % NaOH solution (10 mL), and washed with brine (10 mL), dried over  $Na_2SO_4$  and evaporated under reduced pressure. The crude product was purified by column chromatography ( $SiO_2$ , eluting with 8:2 hexane/ethyl acetate) afforded the desired product ethyl 2-phenoxy pyridine-3-carboxylate as a yellowish oil, (1.3 g, 65%). After that the pure ethyl 2-phenoxy pyridine-3-carboxylate (730 mg, 3.0 mmol, 1.0 equiv) was taken in a 100 mL single necked round bottom flask. LiOH (400 mg, 9.0 mmol, 3.0 equiv), THF (4.0 mL) and water (1.0 mL) were added under stirring. The reaction mixture was stirred for overnight at room temperature. The reaction was monitored by TLC. After the completion of the reaction the solvent was removed under reduced pressure. The residue was cooled to 5 °C by adding ice cold water and neutralised using concentrated HCl. The solid thus obtained was filtered, washed with cold water and dried under reduced pressure. The crude product was purified by column chromatography ( $SiO_2$ , eluting with 6:4 hexane/ethyl acetate) afforded the desired 2-phenoxy pyridine-3-carboxylic acid product as a white solid, (280 mg, 43%), mp 180-182 °C.  $^1H$  NMR (300 MHz,  $DMSO-d_6$ ):  $\delta$  8.22-8.25 (m, 2H), 7.40 (t,  $J = 8.1$  Hz, 2H), 7.17-7.23 (m, 2H), 7.08 (d,  $J = 7.8$  Hz, 2H);  $^{13}C$  NMR (150 MHz,  $DMSO-d_6$ ):  $\delta$  165.9, 160.9, 153.9, 150.6, 141.6, 129.7, 124.6, 121.5, 119.0, 116.4; IR (neat):  $\nu_{max}$  1689, 1586, 1426, 1277, 1240, 751  $cm^{-1}$ ; HRMS (ESI, m/z) calcd. for  $C_{12}H_9NO_3Na$  [ $M + Na$ ] $^+$ : 238.0480; found: 238.0478.

### General experimental procedure for the preparation of 2-(Phenylthio)benzoic acids, Scheme 3.<sup>3</sup>

To a 100 mL round bottom flask equipped with magnetic stir bar, 2-iodo benzoic acid (744 mg, 3.0 mmol, 1.0 equiv) was added in 20 mL of water, followed by thiophenols (3.0 mmol, 1.0 equiv), potassium hydroxide (KOH) (841 mg, 15 mmol, 5.0 equiv) and copper(0) (19 mg, 0.3 mmol). The reaction mixture was heated to 110 °C for 12 h. Then the reaction mixture was

cooled and acidified with 3N HCl until no more precipitate was formed. The resulting precipitates were extracted with dichloromethane (60 mL) and water (50 mL). The organic layer was washed with water (10 mL x 2) and brine (10 mL), dried over anhydrous Na<sub>2</sub>SO<sub>4</sub> and the solvent was evaporated under reduced pressure. The crude product was purified by column chromatography using ethyl acetate/hexane as eluent to afford the desired white solid product.

**2-(Phenylthio)benzoic acid, 3a, Scheme 3.**<sup>3</sup> The same general procedure was followed by using 2-iodo benzoic acid (744 mg, 3.0 mmol, 1.0 equiv) and benzenethiol (0.31 mL, 3.0 mmol, 1.0 equiv). Column chromatography (SiO<sub>2</sub>, eluting with 6:4 hexane/ethyl acetate) afforded the desired product as a white solid, (636 mg, 92%), mp 166-168 °C. <sup>1</sup>H NMR (600 MHz, DMSO-d<sub>6</sub>): δ 7.92 (d, *J* = 7.8 Hz, 1H), 7.47-7.52 (m, 5H), 7.33 (t, *J* = 7.2 Hz, 1H), 7.19 (t, *J* = 7.2 Hz, 1H), 6.72 (d, *J* = 8.4 Hz, 1H); <sup>13</sup>C NMR (150 MHz, DMSO-d<sub>6</sub>): δ 167.8, 142.1, 135.5, 132.8, 132.6, 131.3, 130.5, 129.7, 128.1, 127.3, 125.1; IR (neat): ν<sub>max</sub> 1676, 1465, 1409, 1254, 744, 692 cm<sup>-1</sup>; HRMS (ESI, m/z) calcd. for C<sub>13</sub>H<sub>10</sub>O<sub>2</sub>SNa [M + Na]<sup>+</sup>: 253.0299; found: 253.0301.

**2-(4-Chlorophenylthio)benzoic acid, 3c, Scheme 3.** The same general procedure was followed by using 2-iodo benzoic acid (744 mg, 3.0 mmol, 1.0 equiv) and 4-chlorobenzenethiol (433 mg, 3.0 mmol, 1.0 equiv). Column chromatography (SiO<sub>2</sub>, eluting with 6:4 hexane/ethyl acetate) afforded the desired product as a white solid, (715 mg, 90%), mp 240-242 °C. <sup>1</sup>H NMR (600 MHz, DMSO-d<sub>6</sub>): δ 7.92 (dd, *J* = 7.8 Hz, 1.2 Hz, 1H), 7.52-7.55 (m, 4H), 7.38 (td, *J* = 8.4 Hz, 1.8 Hz, 1H), 7.22 (t, *J* = 7.2 Hz, 1H), 6.76 (d, *J* = 8.4 Hz, 1H); <sup>13</sup>C NMR (150 MHz, DMSO-d<sub>6</sub>): δ 167.8, 141.3, 137.0, 134.6, 133.0, 131.9, 131.3, 130.5, 128.4, 127.6, 125.4; IR (neat): ν<sub>max</sub> 1675, 1465, 1312, 1261, 814, 741 cm<sup>-1</sup>; HRMS (ESI, m/z) calcd. for C<sub>13</sub>H<sub>9</sub>ClO<sub>2</sub>SNa [M + Na]<sup>+</sup>: 286.9909; found: 286.9910.

**2-(*p*-Tolylthio)benzoic acid, 3d, Scheme 3.** The same general procedure was followed by using 2-iodo benzoic acid (744 mg, 3.0 mmol, 1.0 equiv) and 4-methylbenzenethiol (373 mg, 3.0 mmol, 1.0 equiv). Column chromatography (SiO<sub>2</sub>, eluting with 6:4 hexane/ethyl acetate) afforded the desired product as a white solid, (667 mg, 91%), mp 206-208 °C. <sup>1</sup>H NMR (600 MHz, DMSO-d<sub>6</sub>): δ 7.91 (dd, *J* = 7.8 Hz, 1.2 Hz, 1H), 7.41 (d, *J* = 8.4 Hz, 2H), 7.29-7.33 (m, 3H), 7.17 (t, *J* = 7.8 Hz, 1H), 6.68 (d, *J* = 7.8 Hz, 1H), 2.35 (s, 3H); <sup>13</sup>C NMR (150 MHz, DMSO-d<sub>6</sub>): δ 167.8, 142.9, 139.7, 135.8, 132.8, 131.3, 131.2, 128.8, 127.6, 126.8, 124.8, 21.2;

IR (neat):  $\nu_{\max}$  1674, 1461, 1412, 1252, 806, 744  $\text{cm}^{-1}$ ; HRMS (ESI,  $m/z$ ) calcd. for  $\text{C}_{14}\text{H}_{12}\text{O}_2\text{SNa} [\text{M} + \text{Na}]^+$ : 267.0456; found: 267.0453.

### Preparation of 4-Fluoro-2-(phenylthio)benzoic acid, 3b, Scheme 3.

To a 100 mL round bottom flask equipped with magnetic stir bar, 2-chloro-4-fluorobenzoic acid (524 mg, 3.0 mmol, 1.0 equiv) was added in 20 mL of dimethylformamide (DMF), followed by benzenethiol (0.31 mL, 3.0 mmol, 1.0 equiv), potassium hydroxide (KOH) (337 mg, 6.0 mmol, 2.0 equiv) and copper(0) (95 mg, 1.5 mmol, 0.5 equiv). The reaction mixture was heated to 130 °C for 12 h. Then the reaction mixture was cooled and acidified with 3N HCl until no more precipitate had formed. The resulting precipitates were extracted with dichloromethane (60 mL) and cold water (50 mL). The organic layer was washed with cold water (10 mL x 3) and brine (10 mL), dried over anhydrous  $\text{Na}_2\text{SO}_4$  and the solvent was evaporated under reduced pressure. The crude product was purified by column chromatography ( $\text{SiO}_2$ , eluting with 6:4 hexane/ethyl acetate) afforded the desired product as a white solid, (521 mg, 70%), mp 195-197 °C.  $^1\text{H}$ NMR (600 MHz,  $\text{DMSO-d}_6$ ):  $\delta$  8.02 (dd,  $J = 8.4$  Hz, 6.6 Hz, 1H), 7.56-7.60 (m, 5H), 7.04 (td,  $J = 8.4$  Hz, 1.8 Hz, 1H), 6.28 (dd,  $J = 10.8$  Hz, 2.4 Hz, 1H);  $^{13}\text{C}$  NMR (150 MHz,  $\text{DMSO-d}_6$ ):  $\delta$  166.9, 164.6 (d,  $J = 250.5$  Hz), 146.8 (d,  $J = 9.0$  Hz), 136.1, 134.4 (d,  $J = 9.0$  Hz), 131.4, 130.8, 130.5, 123.7 (d,  $J = 3.0$  Hz), 113.0 (d,  $J = 25.5$  Hz), 112.1 (d,  $J = 21.0$  Hz); IR (neat):  $\nu_{\max}$  1675, 1568, 1415, 1258, 909, 690  $\text{cm}^{-1}$ ; HRMS (ESI,  $m/z$ ) calcd. for  $\text{C}_{13}\text{H}_9\text{FO}_2\text{SNa} [\text{M} + \text{Na}]^+$ : 271.0205; found: 271.0189.

### Preparation of 5-Bromo-2-(phenylthio)benzoic acid, 3e, Scheme 3.

To a 100 mL round bottom flask equipped with magnetic stir bar, 2,5-dibromobenzoic acid (840 mg, 3.0 mmol, 1.0 equiv) was added in 20 mL of dimethylformamide (DMF), followed by benzenethiol (0.31 mL, 3.0 mmol, 1.0 equiv), potassium carbonate ( $\text{K}_2\text{CO}_3$ ) (830 mg, 6.0 mmol, 2.0 equiv) and copper(0) (50 mg, 0.75 mmol, 0.25 equiv). The reaction mixture was heated to 150 °C for 12 h. Then the reaction mixture was cooled and acidified with 3N HCl until no more precipitate had formed. The resulting precipitates were extracted with dichloromethane (60 mL) and cold water (50 mL). The organic layer was washed with cold water (10 mL x 3) and brine (10 mL), dried over anhydrous  $\text{Na}_2\text{SO}_4$  and the solvent was evaporated under reduced pressure. The crude product was purified by column chromatography ( $\text{SiO}_2$ , eluting with 6:4 hexane/ethyl

acetate) afforded the desired product as a white solid, (556 mg, 60%), mp 168-170 °C. <sup>1</sup>H NMR (600 MHz, DMSO-d<sub>6</sub>): δ 8.00 (d, *J* = 2.4 Hz, 1H), 7.50-7.57 (m, 6H), 6.64 (d, *J* = 9.0 Hz, 1H); <sup>13</sup>C NMR (150 MHz, DMSO-d<sub>6</sub>): δ 166.5, 141.9, 135.6, 135.4, 133.4, 131.9, 130.6, 130.1, 129.7, 129.2, 117.6; IR (neat): ν<sub>max</sub> 1692, 1457, 1414, 1306, 1248 cm<sup>-1</sup>; HRMS (ESI, *m/z*) calcd. for C<sub>13</sub>H<sub>9</sub>BrO<sub>2</sub>SNa [M + Na]<sup>+</sup>: 330.9404; found: 330.9411.

### Preparation of 5-Fluoro-2-(phenylthio)benzoic acid, 3f, Scheme 3.

To a 100 mL round bottom flask equipped with magnetic stir bar, 2-bromo-5-fluorobenzoic acid (657 mg, 3.0 mmol, 1.0 equiv) was added in 20 mL of dimethylformamide (DMF), followed by benzenethiol (0.31 mL, 3.0 mmol, 1.0 equiv), potassium carbonate (K<sub>2</sub>CO<sub>3</sub>) (830 mg, 6.0 mmol, 2.0 equiv) and copper(0) (50 mg, 0.75 mmol, 0.25 equiv). The reaction mixture was heated to 150 °C for 12 h. Then the reaction mixture was cooled and acidified with 3N HCl until no more precipitate had formed. The resulting precipitates were extracted with dichloromethane (60 mL) and cold water (50 mL). The organic layer was washed with cold water (10 mL x 3) and brine (10 mL), dried over anhydrous Na<sub>2</sub>SO<sub>4</sub> and the solvent was evaporated under reduced pressure. The crude product was purified by column chromatography (SiO<sub>2</sub>, eluting with 6:4 hexane/ethyl acetate) afforded the desired product as a white solid, (462 mg, 62%), mp 160-162 °C. <sup>1</sup>H NMR (600 MHz, DMSO-d<sub>6</sub>): δ 7.66 (dd, *J* = 9.0 Hz, 3.0 Hz, 1H), 7.45-7.51 (m, 5H), 7.28 (td, *J* = 8.4 Hz, 3.0 Hz, 1H), 6.79 (dd, *J* = 9.0 Hz, 5.4 Hz, 1H); <sup>13</sup>C NMR (150 MHz, DMSO-d<sub>6</sub>): δ 166.8 (d, *J* = 3.0 Hz), 159.8 (d, *J* = 243.0 Hz), 136.9 (d, *J* = 3.0 Hz), 135.0, 132.9, 130.5, 130.4 (d, *J* = 7.5 Hz), 130.1 (d, *J* = 7.5 Hz), 129.6, 120.1 (d, *J* = 22.5 Hz), 117.5 (d, *J* = 22.5 Hz); IR (neat): ν<sub>max</sub> 1687, 1465, 1424, 1250, 755 cm<sup>-1</sup>; HRMS (ESI, *m/z*) calcd. for C<sub>13</sub>H<sub>9</sub>FO<sub>2</sub>SNa [M + Na]<sup>+</sup>: 271.0205; found: 271.0210.



## Optimization Details:

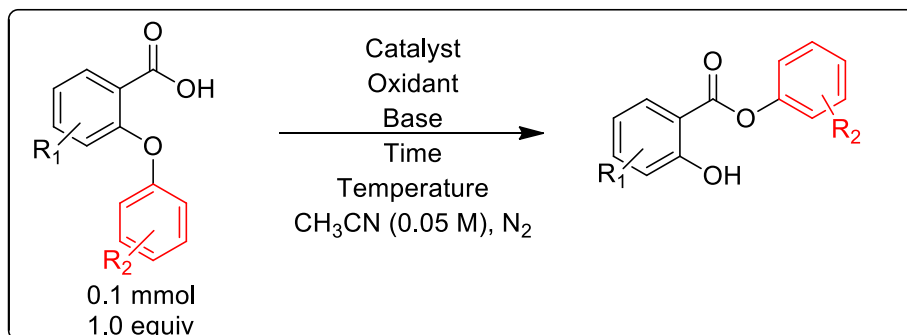

| entry           | catalyst                    | oxidant                                                                    | base | time | temp.  | yield |
|-----------------|-----------------------------|----------------------------------------------------------------------------|------|------|--------|-------|
| 1               | AgNO <sub>3</sub> 10 mol%   | K <sub>2</sub> S <sub>2</sub> O <sub>8</sub> 3.0 equiv                     | -    | 24 h | 120° C | 25%   |
| 2               | AgNO <sub>3</sub> 20 mol%   | K <sub>2</sub> S <sub>2</sub> O <sub>8</sub> 3.0 equiv                     | -    | 24 h | 120° C | 23%   |
| 3               | AgNO <sub>3</sub> 5 mol%    | K <sub>2</sub> S <sub>2</sub> O <sub>8</sub> 3.0 equiv                     | -    | 24 h | 120° C | 30%   |
| 4 <sup>a</sup>  | Cu(OAc) <sub>2</sub> 5 mol% | [PhCO <sub>2</sub> ] <sub>2</sub><br>1.25 equiv                            | -    | 24 h | 75° C  | 18%   |
| 5               | Cu(OAc) <sub>2</sub> 5 mol% | aq. TBHP 3.0<br>equiv                                                      | -    | 24 h | 120° C | 0%    |
| 6               | AgNO <sub>3</sub> 5 mol%    | K <sub>2</sub> S <sub>2</sub> O <sub>8</sub> 2.0 equiv                     | -    | 24 h | 120° C | 34%   |
| 7               | AgNO <sub>3</sub> 5 mol%    | K <sub>2</sub> S <sub>2</sub> O <sub>8</sub> 1.5 equiv                     | -    | 24 h | 120° C | 40%   |
| 8               | AgNO <sub>3</sub> 5 mol%    | K <sub>2</sub> S <sub>2</sub> O <sub>8</sub> 1.0 equiv                     | -    | 24 h | 120° C | 35%   |
| 9               | AgNO <sub>3</sub> 5 mol%    | K <sub>2</sub> S <sub>2</sub> O <sub>8</sub> 1.5 equiv                     | -    | 36 h | 130° C | 44%   |
| 10              | Cu(OAc) <sub>2</sub> 5 mol% | TBHP in decene<br>3.0 equiv                                                | -    | 36 h | 130° C | 0%    |
| 11 <sup>b</sup> | AgNO <sub>3</sub> 5 mol%    | K <sub>2</sub> S <sub>2</sub> O <sub>8</sub> 1.5 equiv                     | -    | 36 h | 130° C | 0%    |
| 12 <sup>c</sup> | AgNO <sub>3</sub> 5 mol%    | K <sub>2</sub> S <sub>2</sub> O <sub>8</sub> 1.5 equiv                     | -    | 36 h | 130° C | 0%    |
| 13 <sup>d</sup> | AgNO <sub>3</sub> 5 mol%    | K <sub>2</sub> S <sub>2</sub> O <sub>8</sub> 1.5 equiv                     | -    | 36 h | 130° C | 20%   |
| 14              | AgNO <sub>3</sub> 5 mol%    | (NH <sub>4</sub> ) <sub>2</sub> S <sub>2</sub> O <sub>8</sub><br>1.5 equiv | -    | 36 h | 130° C | 27%   |
| 15              | AgNO <sub>3</sub> 5 mol%    | PhI(OAc) <sub>2</sub><br>1.5 equiv                                         | -    | 36 h | 130° C | 0%    |
| 16              | AgNO <sub>3</sub> 5 mol%    | [PhCO <sub>2</sub> ] <sub>2</sub><br>1.5 equiv                             | -    | 36 h | 130° C | trace |
| 17              | AgNO <sub>3</sub> 10 mol%   | K <sub>2</sub> S <sub>2</sub> O <sub>8</sub> 1.5 equiv                     | -    | 36 h | 130° C | 35%   |
| 18              | AgNO <sub>3</sub> 2.5 mol%  | K <sub>2</sub> S <sub>2</sub> O <sub>8</sub> 1.5 equiv                     | -    | 36 h | 130° C | 32%   |

|                 |                                        |                                                         |                                              |      |        |       |
|-----------------|----------------------------------------|---------------------------------------------------------|----------------------------------------------|------|--------|-------|
| 19              | AgOAc 5 mol%                           | K <sub>2</sub> S <sub>2</sub> O <sub>8</sub> 1.5 equiv  | -                                            | 36 h | 130° C | 34%   |
| 20              | Ag <sub>2</sub> O 5 mol%               | K <sub>2</sub> S <sub>2</sub> O <sub>8</sub> 1.5 equiv  | -                                            | 36 h | 130° C | 33%   |
| 21              | Ag <sub>2</sub> CO <sub>3</sub> 5 mol% | K <sub>2</sub> S <sub>2</sub> O <sub>8</sub> 1.5 equiv  | -                                            | 36 h | 130° C | 36%   |
| 22              | Ag <sub>2</sub> SO <sub>4</sub> 5 mol% | K <sub>2</sub> S <sub>2</sub> O <sub>8</sub> 1.5 equiv  | -                                            | 36 h | 130° C | 35%   |
| 23              | Cu(OAc) <sub>2</sub> 5 mol%            | K <sub>2</sub> S <sub>2</sub> O <sub>8</sub> 1.5 equiv  | -                                            | 36 h | 120° C | 25%   |
| 24              | Pd(TFA) <sub>2</sub> 5 mol%            | K <sub>2</sub> S <sub>2</sub> O <sub>8</sub> 1.5 equiv  | -                                            | 36 h | 130° C | trace |
| 25              | Fe(acac) <sub>3</sub> 5 mol%           | K <sub>2</sub> S <sub>2</sub> O <sub>8</sub> 1.5 equiv  | -                                            | 36 h | 130° C | 36%   |
| 26              | Fe(acac) <sub>3</sub> 20 mol%          | K <sub>2</sub> S <sub>2</sub> O <sub>8</sub> 1.5 equiv  | -                                            | 36 h | 130° C | 37%   |
| 27              | Ni(OTf) <sub>2</sub> 5 mol%            | K <sub>2</sub> S <sub>2</sub> O <sub>8</sub> 1.5 equiv  | -                                            | 36 h | 130° C | 35%   |
| 28              | Fe <sub>2</sub> O <sub>3</sub> 5 mol%  | K <sub>2</sub> S <sub>2</sub> O <sub>8</sub> 1.5 equiv  | -                                            | 36 h | 130° C | 40%   |
| 29              | TBAI 5 mol%                            | K <sub>2</sub> S <sub>2</sub> O <sub>8</sub> 1.5 equiv  | -                                            | 36 h | 130° C | 30%   |
| 30              | I <sub>2</sub> 10 mol%                 | TBHP in decene<br>3.0 equiv                             | -                                            | 36 h | 130° C | 0%    |
| 31              | AgNO <sub>3</sub> 5 mol%               | Selectflour<br>1.5 equiv                                | -                                            | 36 h | 120° C | trace |
| 32 <sup>e</sup> | AgNO <sub>3</sub> 5 mol%               | K <sub>2</sub> S <sub>2</sub> O <sub>8</sub> 1.5 equiv. | -                                            | 36 h | 130° C | 0%    |
| 33              | AgNO <sub>3</sub> 5 mol%               | K <sub>2</sub> S <sub>2</sub> O <sub>8</sub> 1.5 equiv  | NaHCO <sub>3</sub><br>1.5 equiv.             | 36 h | 130° C | 35%   |
| 34              | AgNO <sub>3</sub> 5 mol%               | K <sub>2</sub> S <sub>2</sub> O <sub>8</sub> 1.5 equiv  | K <sub>2</sub> CO <sub>3</sub> 2.0 equiv     | 36 h | 130° C | 10%   |
| 35              | AgNO <sub>3</sub> 5 mol%               | K <sub>2</sub> S <sub>2</sub> O <sub>8</sub> 1.5 equiv  | Na <sub>2</sub> CO <sub>3</sub> 2.0 equiv    | 36 h | 130° C | 18%   |
| 36              | AgNO <sub>3</sub> 5 mol%               | K <sub>2</sub> S <sub>2</sub> O <sub>8</sub> 1.5 equiv  | Cs <sub>2</sub> CO <sub>3</sub> 2 equiv      | 36 h | 130° C | trace |
| 37              | AgNO <sub>3</sub> 5 mol%               | K <sub>2</sub> S <sub>2</sub> O <sub>8</sub> 1.5 equiv  | <sup>t</sup> BuOK 2.0 equiv                  | 36 h | 130° C | 0%    |
| 38              | AgNO <sub>3</sub> 5 mol%               | K <sub>2</sub> S <sub>2</sub> O <sub>8</sub> 1.5 equiv  | K <sub>2</sub> HPO <sub>4</sub> 2.0<br>equiv | 36 h | 130° C | 34%   |
| 39              | AgNO <sub>3</sub> 5 mol%               | K <sub>2</sub> S <sub>2</sub> O <sub>8</sub> 1.5 equiv  | CF <sub>3</sub> COONa<br>2.0 equiv           | 36 h | 130° C | 50%   |
| 40              | AgNO <sub>3</sub> 5 mol%               | K <sub>2</sub> S <sub>2</sub> O <sub>8</sub> 1.5 equiv  | CH <sub>3</sub> COONa<br>2.0 equiv           | 36 h | 130° C | 30%   |
| 41              | AgNO <sub>3</sub> 5 mol%               | K <sub>2</sub> S <sub>2</sub> O <sub>8</sub> 1.5 equiv  | CF <sub>3</sub> COONa<br>3.0 equiv           | 36 h | 130° C | 48%   |
| 42              | AgNO <sub>3</sub> 5 mol%               | K <sub>2</sub> S <sub>2</sub> O <sub>8</sub> 1.5 equiv  | CF <sub>3</sub> COOK<br>2.0 equiv            | 36 h | 130° C | 64%   |
| 43              | AgNO <sub>3</sub> 5 mol%               | K <sub>2</sub> S <sub>2</sub> O <sub>8</sub> 1.5 equiv  | CF <sub>3</sub> COOK<br>1.5 equiv            | 36 h | 130° C | 57%   |

|                 |                           |                                                         |                                           |      |        |     |
|-----------------|---------------------------|---------------------------------------------------------|-------------------------------------------|------|--------|-----|
| 44              | AgNO <sub>3</sub> 5 mol%  | Na <sub>2</sub> S <sub>2</sub> O <sub>8</sub> 1.5 equiv | CF <sub>3</sub> COOK<br>2.0 equiv         | 36 h | 130° C | 53% |
| 45              | AgNO <sub>3</sub> 5 mol%  | K <sub>2</sub> S <sub>2</sub> O <sub>8</sub> 1.5 equiv. | CH <sub>3</sub> COOCs<br>2.0 equiv        | 36 h | 130° C | 18% |
| 46              | AgNO <sub>3</sub> 5 mol%  | K <sub>2</sub> S <sub>2</sub> O <sub>8</sub> 1.5 equiv  | DBU 2.0 equiv                             | 36 h | 130° C | 0%  |
| 47              | AgNO <sub>3</sub> 5 mol%  | K <sub>2</sub> S <sub>2</sub> O <sub>8</sub> 1.5 equiv  | KHCO <sub>3</sub> 2.0 equiv               | 36 h | 130° C | 20% |
| 48              | AgNO <sub>3</sub> 5 mol%  | K <sub>2</sub> S <sub>2</sub> O <sub>8</sub> 1.5 equiv  | Li <sub>2</sub> CO <sub>3</sub> 2.0 equiv | 36 h | 130° C | 32% |
| 49              | AgNO <sub>3</sub> 10 mol% | K <sub>2</sub> S <sub>2</sub> O <sub>8</sub> 1.5 equiv  | CF <sub>3</sub> COOK<br>2.0 equiv         | 36 h | 130° C | 52% |
| 50              | AgNO <sub>3</sub> 5 mol%  | K <sub>2</sub> S <sub>2</sub> O <sub>8</sub> 2.0 equiv  | CF <sub>3</sub> COOK<br>2.0 equiv         | 36 h | 130° C | 50% |
| 51 <sup>f</sup> | AgNO <sub>3</sub> 5 mol%  | K <sub>2</sub> S <sub>2</sub> O <sub>8</sub> 1.5 equiv  | CF <sub>3</sub> COOK<br>2.0 equiv         | 36 h | 130° C | 60% |
| 52              | -                         | K <sub>2</sub> S <sub>2</sub> O <sub>8</sub> 1.5 equiv  | CF <sub>3</sub> COOK<br>2.0 equiv         | 36 h | 130° C | 37% |
| 53              | AgNO <sub>3</sub> 5 mol%  | -                                                       | CF <sub>3</sub> COOK<br>2.0 equiv         | 36 h | 130° C | 0%  |
| 54              | -                         | -                                                       | CF <sub>3</sub> COOK<br>2.0 equiv         | 36 h | 130° C | 0%  |

<sup>a</sup>HIFP solvent was used. <sup>b</sup>(CH<sub>3</sub>CN:H<sub>2</sub>O, 1:1) solvent was used. <sup>c</sup>DMF, DMSO, THF, DCE, 1,4-dioxane, Ph-CF<sub>3</sub>, Toluene and CF<sub>3</sub>COOH solvent was used. <sup>d</sup>PhCN solvent was used. <sup>e</sup>1,10-Phenanthroline ligand was used. <sup>f</sup>O<sub>2</sub> was used.

### Migratory reaction of 1a at 0.5 mmol scale, Scheme 2.

To an oven-dried 100 mL sealed tube, a mixture of 2-phenoxybenzoic acid (107 mg, 0.5 mmol, 1.0 equiv), silver nitrate (4.3 mg, 0.025 mmol), potassium persulfate (203 mg, 0.75 mmol, 1.5 equiv) and potassium trifluoroacetate (152 mg, 1.0 mmol, 2.0 equiv) was taken and dry MeCN (10 mL) was added to it. After flushing with nitrogen, the vessel was sealed with a screw cap. The reaction mixture was allowed to stir for 36 h at 130 °C. After completion (as indicated by TLC), the reaction mixture was cooled to room temperature. Then the reaction mixture was poured into water (50 mL) and extracted with ethyl acetate (50 mL). The organic layer was washed with water (10 mL x 3) and brine (10 mL), dried over anhydrous Na<sub>2</sub>SO<sub>4</sub> and the solvent was evaporated under reduced pressure. The crude product was purified by column chromatography (SiO<sub>2</sub>, eluting with 9:1 hexane/ethyl acetate) afforded the desired product as a yellow oil, (53.5 mg, 50%).

The electrospray ionization (ESI) mass data of the crude standard reaction mixture

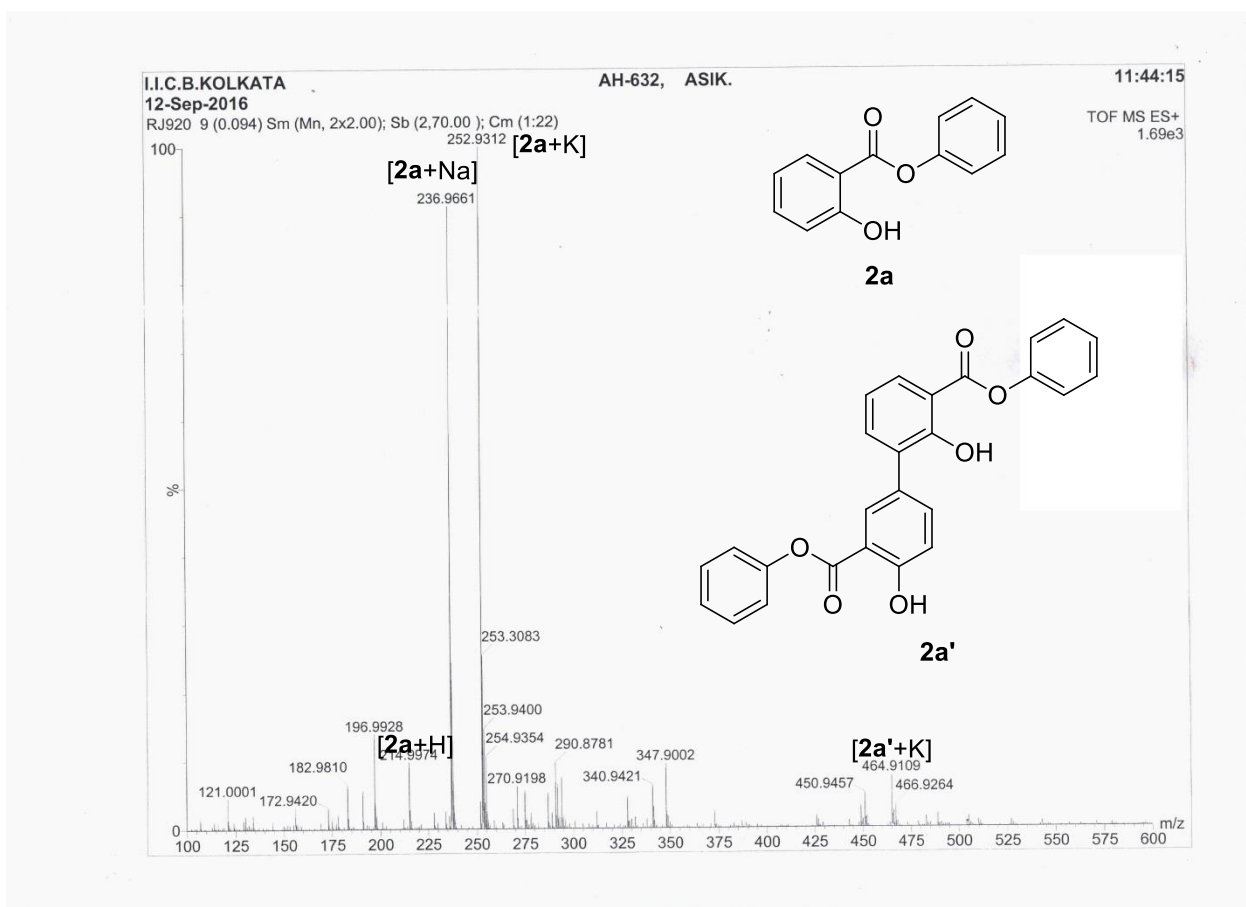

#### **Control experiments, Scheme 4.**

##### **The standard reaction with radical scavenger (2,2,6,6-Tetramethylpiperidin-1-yl)oxyl (TEMPO), Scheme 4a.**

To an oven-dried 15 mL sealed tube, a mixture of 2-phenoxybenzoic acid (21.5 mg, 0.1 mmol, 1.0 equiv), silver nitrate (0.9 mg, 0.005 mmol), potassium persulfate (40.5 mg, 0.15 mmol, 1.5 equiv), potassium trifluoroacetate (30.5 mg, 0.2 mmol, 2.0 equiv) and (2,2,6,6-Tetramethylpiperidin-1-yl)oxyl (TEMPO) (31 mg, 0.2 mmol, 2.0 equiv) was taken and dry MeCN (2.0 mL) was added to it. After flushing with nitrogen, the vessel was sealed with a screw cap. The reaction mixture was allowed to stir for 36 h at 130 °C. The reaction mixture was cooled to room temperature. A very trace amount (>5%) product was formed as indicated by TLC.

##### **The standard reaction with radical scavenger (Butylated hydroxytoluene (BHT), Scheme 4a.**

To an oven-dried 15 mL sealed tube, a mixture of 2-phenoxybenzoic acid (21.5 mg, 0.1 mmol, 1.0 equiv), silver nitrate (0.9 mg, 0.005 mmol), potassium persulfate (40.5 mg, 0.15 mmol, 1.5 equiv), potassium trifluoroacetate (30.5 mg, 0.2 mmol, 2.0 equiv) and butylated hydroxytoluene (BHT) (88 mg, 0.2 mmol, 2.0 equiv) was taken and dry MeCN (2.0 mL) was added to it. After flushing with nitrogen, the vessel was sealed with a screw cap. The reaction mixture was allowed to stir for 36 h at 130 °C. The reaction mixture was cooled to room temperature. A very trace amount (>5%) product was formed as indicated by TLC.

##### **Crossover experiment, Scheme 4b.**

To an oven-dried 15 mL sealed tube, a mixture of 2-(4-methoxyphenoxy)benzoic acid (12.5 mg, 0.05 mmol, 1.0 equiv), 5-nitro-2-phenoxybenzoic acid (13 mg, 0.05 mmol, 1.0 equiv), silver nitrate (0.9 mg, 0.005 mmol), potassium persulfate (40.5 mg, 0.15 mmol, 1.5 equiv) and potassium trifluoroacetate (30.5 mg, 0.2 mmol, 2.0 equiv) was taken then dry MeCN (2.0 mL) was added to it. After flushing with nitrogen, the vessel was sealed with a screw cap. The reaction mixture was allowed to stir for 36 h at 130 °C. After completion (as detected by TLC), the reaction mixture was cooled to room temperature. Then the reaction mixture was poured into

water (20 mL) and extracted with ethyl acetate (20 mL). The organic layer was washed with water (10 mL) and brine (10 mL), dried over anhydrous Na<sub>2</sub>SO<sub>4</sub> and the solvent was evaporated under reduced pressure. The crude product was purified by column chromatography using ethyl acetate/hexane (9/1) as eluent to afford the desired product **2e** in 55% yield (~ 6.5 mg) and **2s** in 40% yield (5.0 mg).

#### Cross-over Experiments

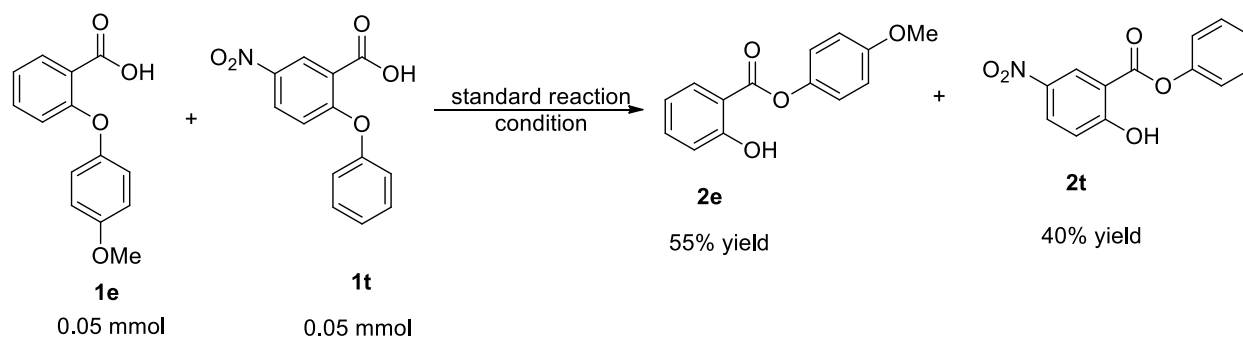

AH-548-1H/1 —

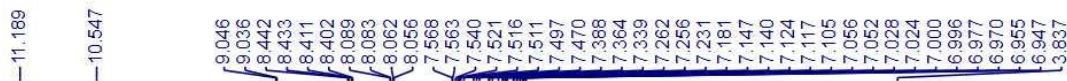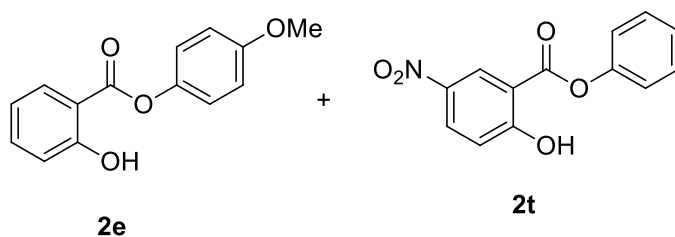

Cross-over Products

**2e:2t = 3:2**

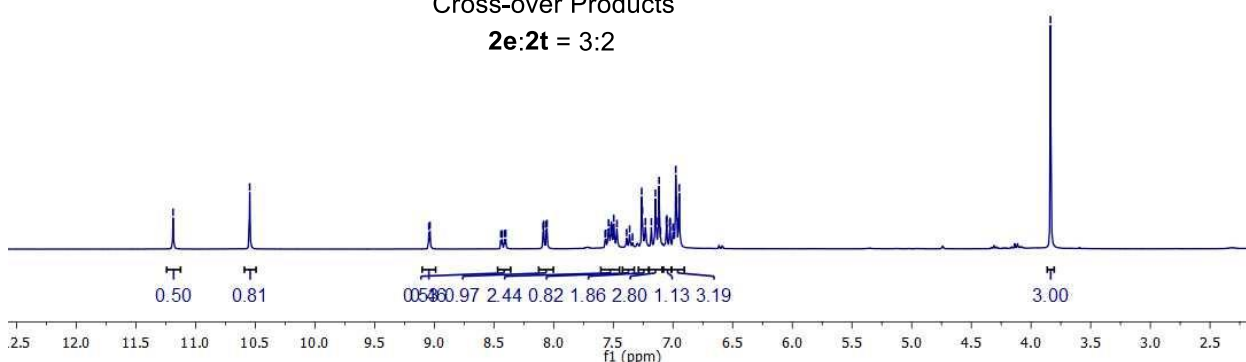

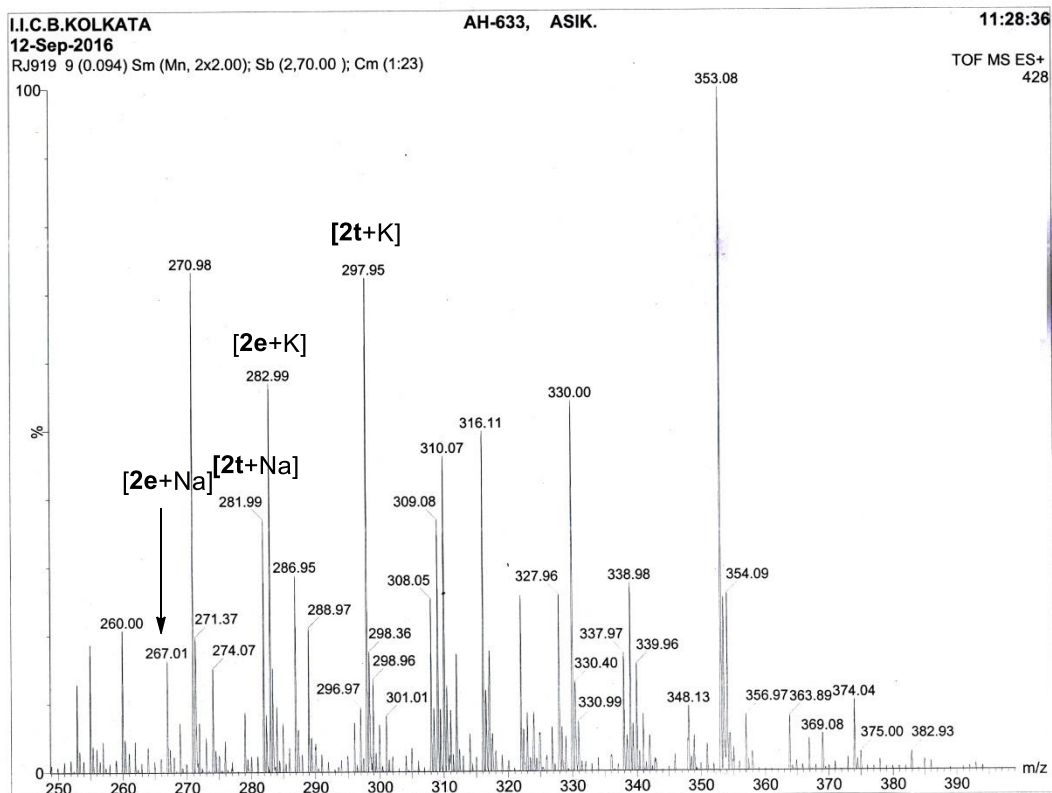

#### Experimental procedure for the selective reduction of disulfide bond.<sup>4</sup>

To an oven-dried 10 mL round bottom flask equipped with magnetic stir bar, a mixture of diphenyl 2,2'-disulfanediyldibenzoate (**4a**) (59.5 mg, 0.13 mmol, 1.0 equiv) and triphenylphosphine (34 mg, 0.13 mmol, 1.0 equiv) was taken in a mixed solvent 1,4-dioxane (1.0 mL) and water (0.2 mL). To this reaction mixture one drop of HCl was added. The reaction mixture was stirred at 40 °C for 2.0 h under nitrogen atmosphere. After completion (as detected by TLC), the reaction mixture was poured into water (20 mL) and extracted with ethyl acetate (30 mL). The organic layer was washed with water (10 mL x 2) and brine (10 mL), dried over anhydrous Na<sub>2</sub>SO<sub>4</sub> and the solvent was evaporated under reduced pressure. The crude product was purified by column chromatography (SiO<sub>2</sub>, eluting with 9:1 hexane/ethyl acetate) afforded the desired monomer product as a white solid phenyl 2-mercaptobenzoate (**5a**)<sup>27</sup>, (45.5 mg, 76%), mp 79-81 °C. <sup>1</sup>H NMR (600 MHz, CDCl<sub>3</sub>): δ 8.29 (d, *J* = 7.8 Hz, 1H), 7.46 (t, *J* = 8.4 Hz, 2H), 7.39-7.43 (m, 2H), 7.31 (t, *J* = 7.2 Hz, 1H), 7.24-7.28 (m, 3H), 4.78 (s, 1H); <sup>13</sup>C NMR (150 MHz, CDCl<sub>3</sub>): δ 165.3, 150.6, 139.5, 133.1, 132.2, 131.1, 129.5, 126.0, 125.0, 124.8, 121.8; IR

(neat):  $\nu_{\max}$  1715, 1590, 1483, 1251, 1193, 1043, 744  $\text{cm}^{-1}$ ; HRMS (ESI,  $m/z$ ) calcd. for  $\text{C}_{13}\text{H}_{10}\text{O}_2\text{SNa}$  [ $\text{M} + \text{Na}$ ] $^+$ : 253.0299; found: 253.0284.

### **Experimental procedure for the hydrolysis of Phenyl 2-hydroxybenzoate ester (2a) to the corresponding Salicylic acid (6a) and Phenol.**

To a 10 mL round bottom flask equipped with magnetic stir bar, the phenyl 2-hydroxybenzoate ester (**2a**) (43 mg, 0.2 mmol) was dissolved in a solution of NaOH (80 mg, 10 equiv) in 1.0 mL  $\text{H}_2\text{O}$  and 1.0 mL MeOH and stirred at room temperature for 12 h. The reaction mixture was then acidified with 6N HCl. The resulting mixture was extracted with dichloromethane (30 mL) and water (20 mL). The organic layer was washed with water (10 mL) and brine (10 mL), dried over anhydrous  $\text{Na}_2\text{SO}_4$  and the solvent was evaporated under reduced pressure. The crude product was purified by column chromatography using silica gel, hexane/ ethyl acetate = 7/3 as eluent to afford the desired white solid salicylic acid (**6a**) in 92% (25.5 mg) yield.  $^1\text{H}$  NMR (600 MHz,  $\text{CDCl}_3$ ):  $\delta$  7.79 (d,  $J = 7.2$  Hz, 1H), 7.50 (t,  $J = 7.8$  Hz, 1H), 6.94 (d,  $J = 8.4$  Hz, 1H), 6.91 (t,  $J = 7.8$  Hz, 1H);  $^{13}\text{C}$  NMR (150 MHz,  $\text{CDCl}_3$ ):  $\delta$  172.4, 161.6, 136.1, 130.7, 119.6, 117.5, 113.3.

### **Crystal Structure:**

The crystal was grown in chloroform solvent. The pure compound was dissolved in dry chloroform and slow evaporation led to the crystal **2t**. The crystal data was collected in X-ray spectroscopy (Bruker Kappa Apex-2, CCD Area Detector), and the data was analyzed using olex2 software. The structures are given below. The corresponding .cif file has been uploaded separately as supporting information.

### **Crystal data and structure refinement for the compound (2t) rj\_ah421\_0m.**

|                     |                                      |
|---------------------|--------------------------------------|
| Identification code | rj_ah421_0m                          |
| Empirical formula   | $\text{C}_{13}\text{H}_9\text{NO}_5$ |
| Formula weight      | 259.21                               |
| Temperature/K       | 293.15                               |
| Crystal system      | monoclinic                           |
| Space group         | $\text{P}2_1/\text{c}$               |
| $a/\text{\AA}$      | 10.7430(9)                           |
| $b/\text{\AA}$      | 16.6008(14)                          |
| $c/\text{\AA}$      | 6.9203(7)                            |



|                                               |                                                               |
|-----------------------------------------------|---------------------------------------------------------------|
| $\alpha/^\circ$                               | 90                                                            |
| $\beta/^\circ$                                | 100.069(5)                                                    |
| $\gamma/^\circ$                               | 90                                                            |
| Volume/ $\text{\AA}^3$                        | 1215.17(19)                                                   |
| Z                                             | 4                                                             |
| $\rho_{\text{calc}}/\text{g/cm}^3$            | 1.417                                                         |
| $\mu/\text{mm}^{-1}$                          | 0.111                                                         |
| F(000)                                        | 536.0                                                         |
| Crystal size/ $\text{mm}^3$                   | $0.2 \times 0.1 \times 0.1$                                   |
| Radiation                                     | MoK $\alpha$ ( $\lambda = 0.71073$ )                          |
| $2\Theta$ range for data collection/ $^\circ$ | 3.85 to 55.052                                                |
| Index ranges                                  | $-13 \leq h \leq 13, -21 \leq k \leq 16, -8 \leq l \leq 9$    |
| Reflections collected                         | 11534                                                         |
| Independent reflections                       | 2674 [ $R_{\text{int}} = 0.0374, R_{\text{sigma}} = 0.0344$ ] |
| Data/restraints/parameters                    | 2674/0/174                                                    |
| Goodness-of-fit on $F^2$                      | 1.052                                                         |
| Final R indexes [ $I \geq 2\sigma(I)$ ]       | $R_1 = 0.0468, wR_2 = 0.1185$                                 |
| Final R indexes [all data]                    | $R_1 = 0.0772, wR_2 = 0.1364$                                 |
| Largest diff. peak/hole / $e \text{\AA}^{-3}$ | 0.18/-0.15                                                    |

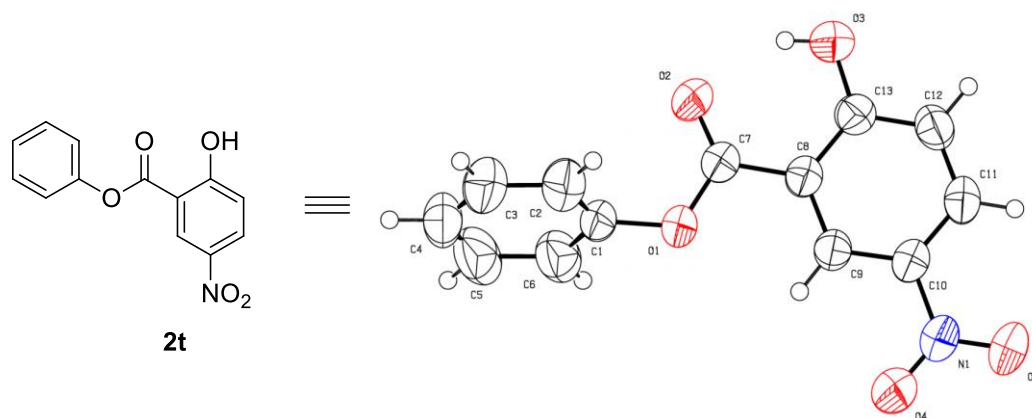

**Figure 1.** Crystal structure of **2t** (30% ellipsoid contour probability).

## **References:**

1. C. Wang, I. Piel and F. Glorius, *J. Am. Chem. Soc.*, 2009, **131**, 4194-4195.
2. A. Vinayak, M. Sudha, R. P. Kumar and K. Lalita. S, *Int. Res. J. Pharm.*, 2013, **12**, 62-66.
3. J. D. Majmudar, H. B. Hodges-Loaiza, K. Hahne, J. L. Donelson, J. Song, L. Shrestha, M. L. Harrison, C. A. Hrycyna and R. A. Gibbs, *Bioorg. Med. Chem.*, 2012, **20**, 283-295.
4. L. E. Overman, J. Smoot and J. D. Overman, *Synthesis*, 1974, 59-60.

AH-364-1H/1  
AH-364 1H in DMSO-d6 23.04.15  
-12.841

7.821  
7.795  
7.567  
7.561  
7.540  
7.537  
7.515  
7.509  
7.357  
7.329  
7.304  
7.269  
7.244  
7.219  
7.088  
7.064  
7.039  
6.996  
6.969  
6.895  
6.867

-3.343

-2.479

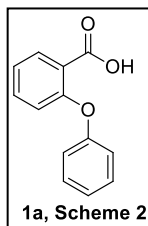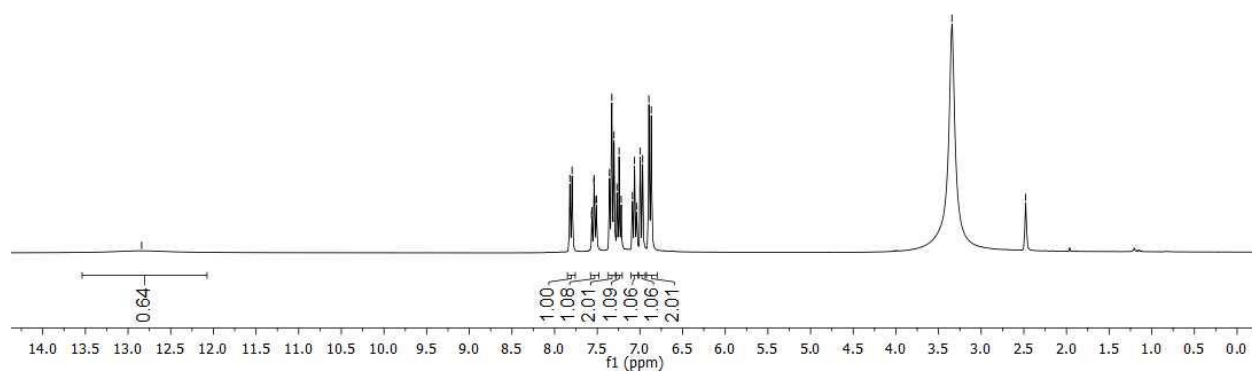

AH-364-C/1

-166.55

-157.48

-154.86

133.52  
131.39  
129.87  
124.57  
123.99  
122.85  
121.00  
117.62

40.33  
40.06  
39.78  
39.50  
39.22  
38.95  
38.66

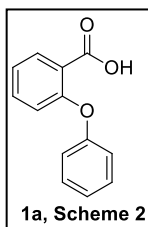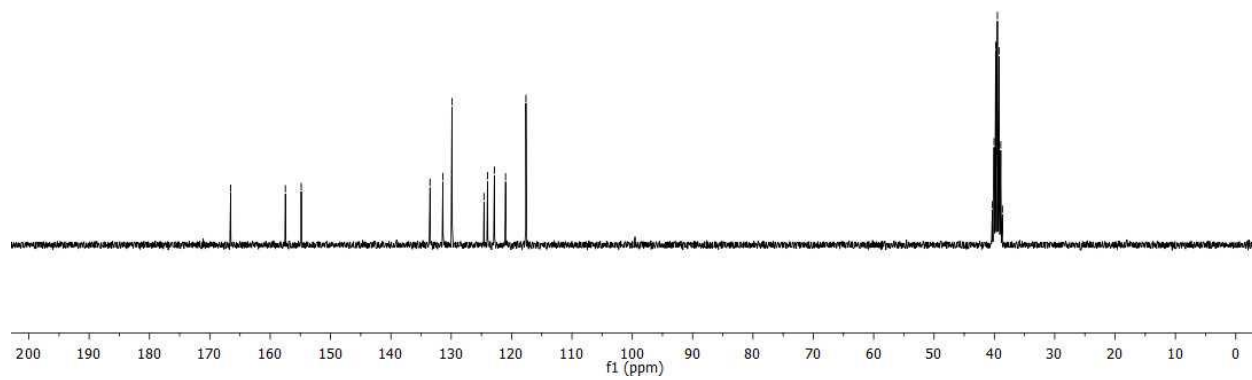

AH-368-1H/1  
AH-368 1H in DMSO-d6 14.5.15

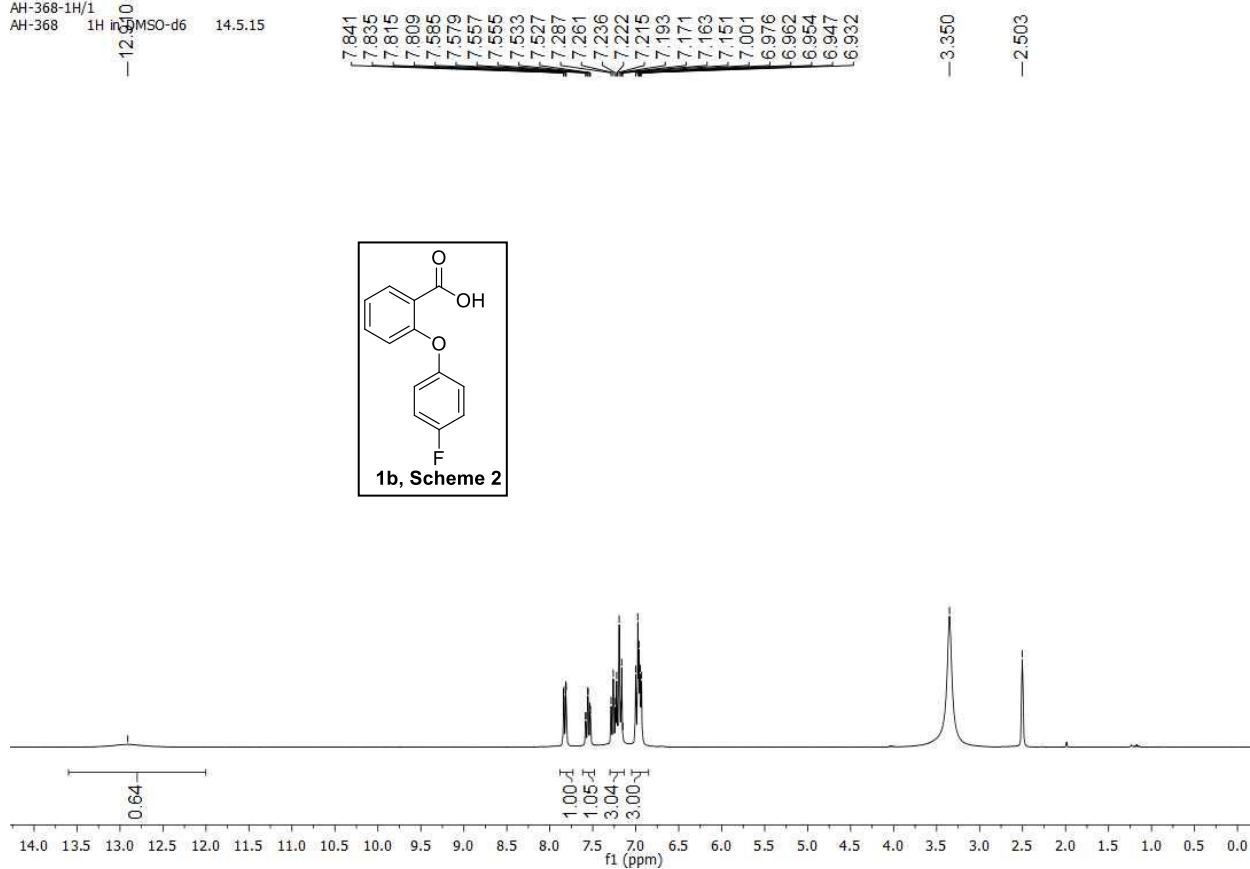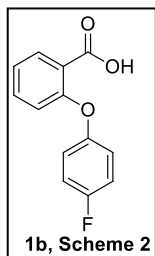

AH-368-C/1

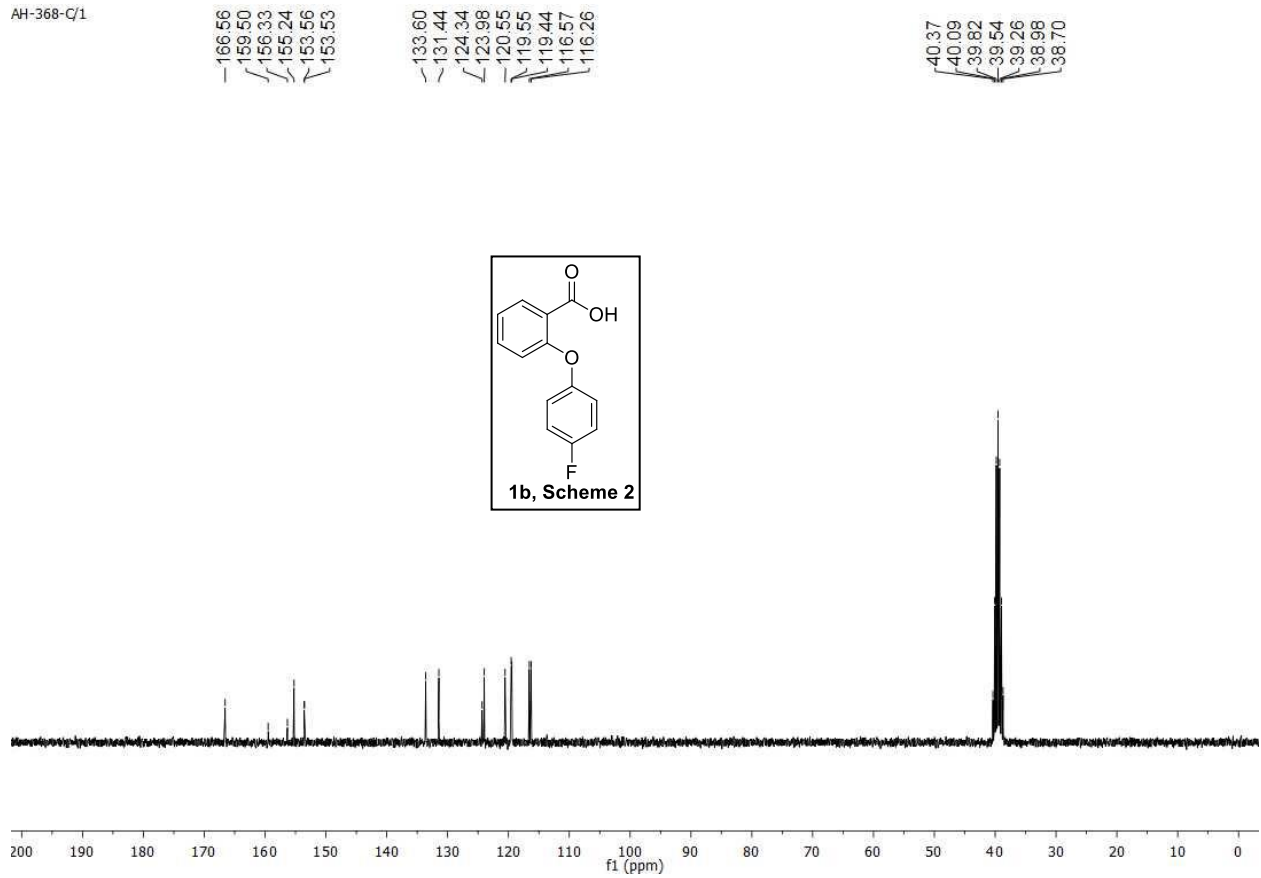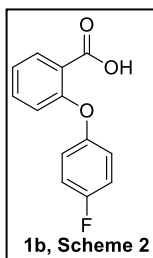

AH-367  
 7.881  
 7.868  
 7.842  
 7.837  
 7.825  
 7.819  
 7.808  
 7.595  
 7.573  
 7.567  
 7.409  
 7.398  
 7.391  
 7.375  
 7.368  
 7.357  
 7.339  
 7.337  
 7.312  
 7.289  
 7.286  
 7.091  
 7.064  
 6.925  
 6.914  
 6.907  
 6.891  
 6.884  
 6.873

3.386

2.498

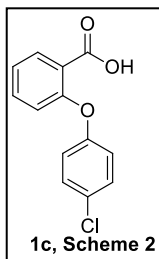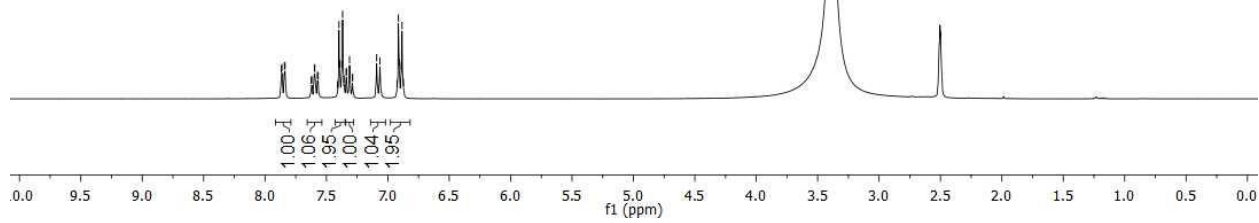

AH-367-C/1

166.35  
 156.71  
 154.32  
 133.81  
 131.58  
 129.69  
 126.48  
 124.74  
 124.67  
 121.63  
 118.98  
 40.36  
 40.07  
 39.80  
 39.52  
 39.24  
 38.96  
 38.68

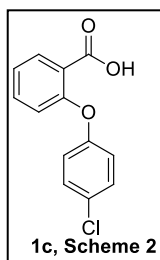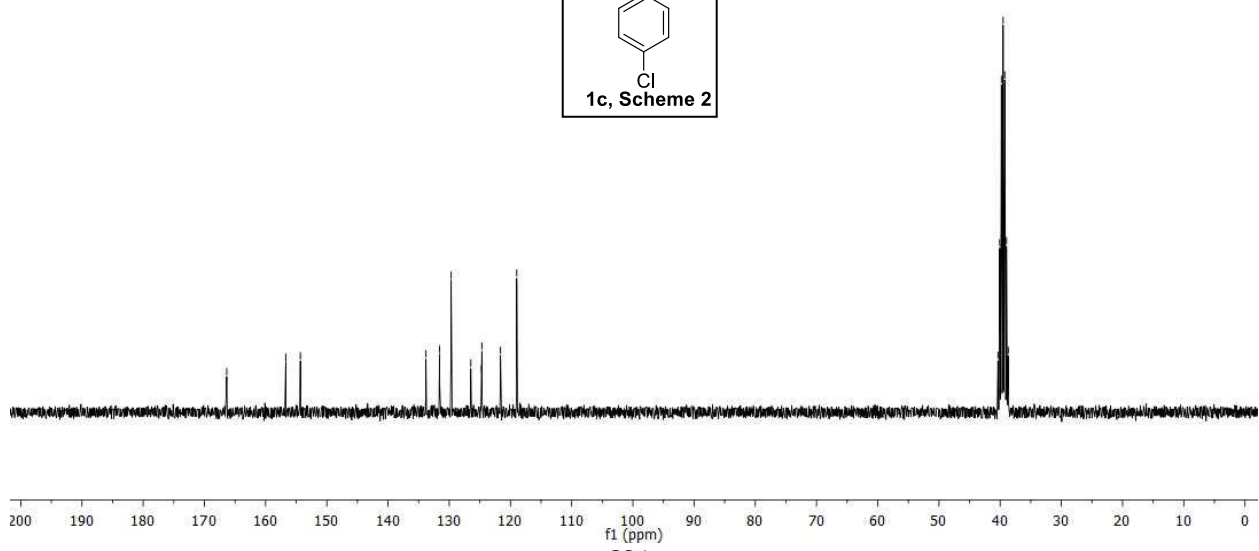

AH-379-1H/1  
AH-379 1H in MSO-d6 27.5.15  
-12.88

7.872  
7.849  
7.626  
7.601  
7.577  
7.520  
7.491  
7.344  
7.319  
7.294  
7.106  
7.079  
6.858  
6.828

-3.354  
-2.503

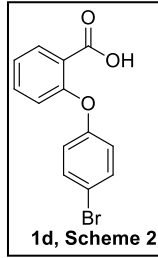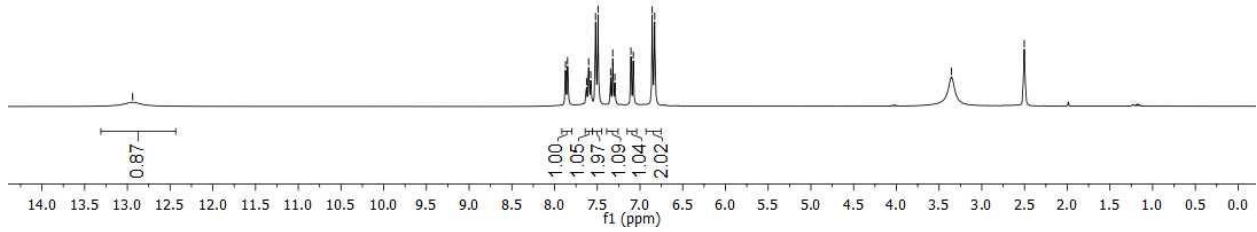

AH-379-C/1

-166.28

-157.22

-154.15

-133.79

-132.55

-131.57

-124.72

-121.73

-119.31

-114.21

-40.34

-40.06

-39.78

-39.50

-39.22

-38.95

-38.67

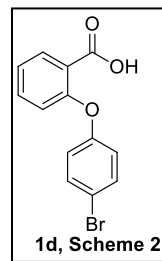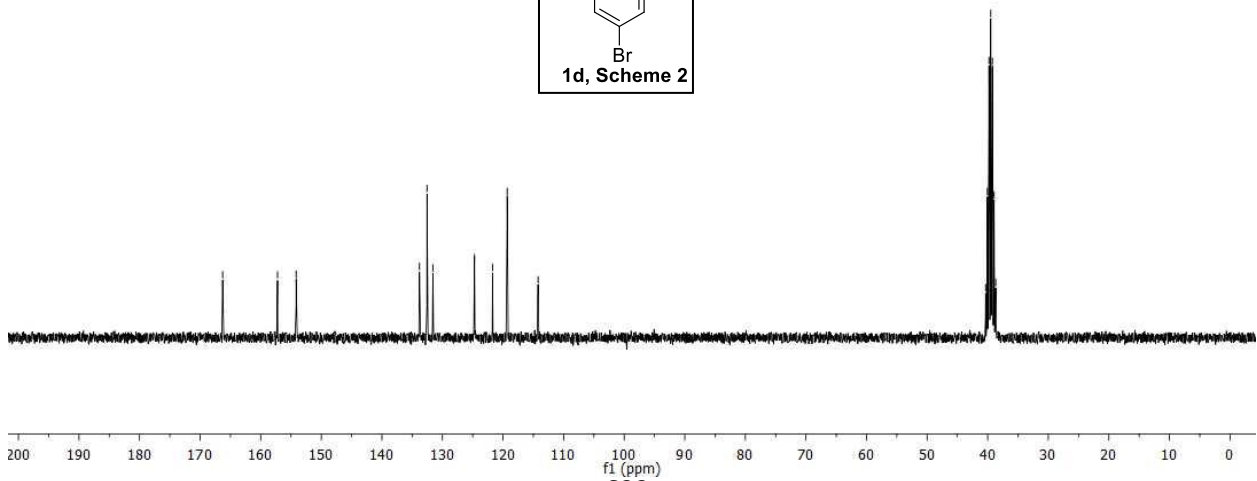

AH-370-1H/1  
AH-370 1H in DMSO-d6

7.781  
7.776  
7.756  
7.651  
7.507  
7.502  
7.479  
7.455  
7.450  
7.191  
7.166  
7.141  
6.954  
6.823  
6.890  
6.858  
6.831

-3.725

-3.368

-2.493

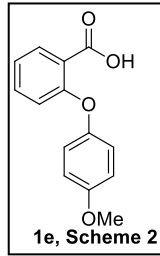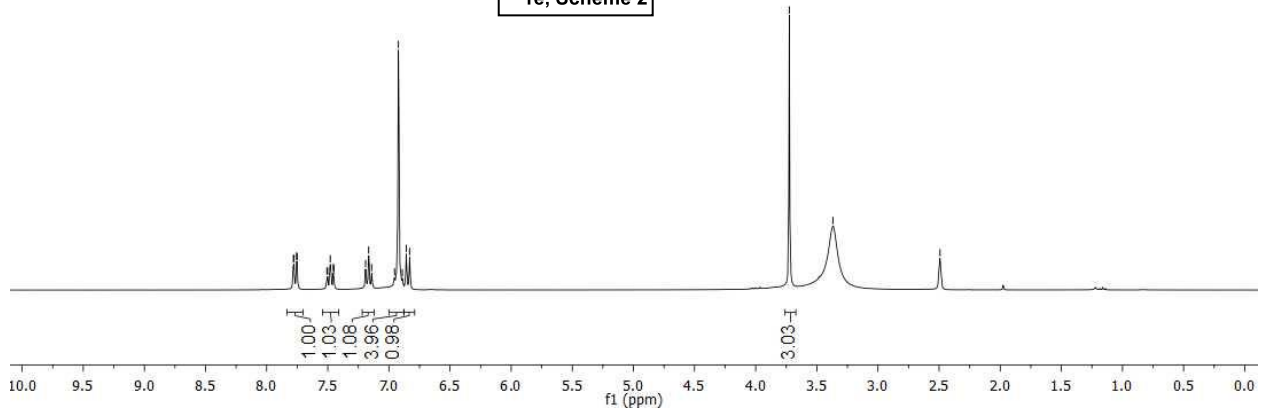

AH-370-C/1

-167.06

-156.44

-155.54

-150.34

-133.43

-131.33

-123.78

-123.12

-120.03

-119.23

-115.18

-55.58

-40.33

-40.06

-39.78

-39.50

-39.22

-38.94

-38.67

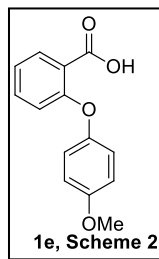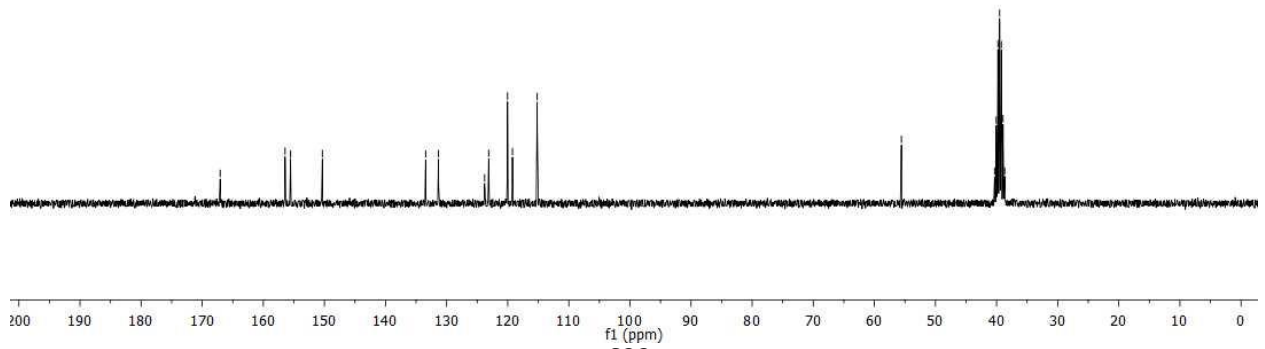

AH-382-1H/1

—12.851

7.795  
7.791  
7.770  
7.765  
7.525  
7.520  
7.497  
7.467  
7.442  
7.422  
7.399  
7.374  
7.354  
7.331  
7.308  
7.208  
7.183  
7.159  
7.040  
7.010  
6.934  
6.904  
6.882  
6.854  
5.073

—3.359

—2.503

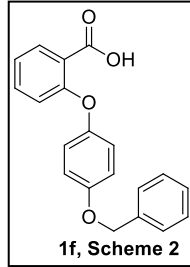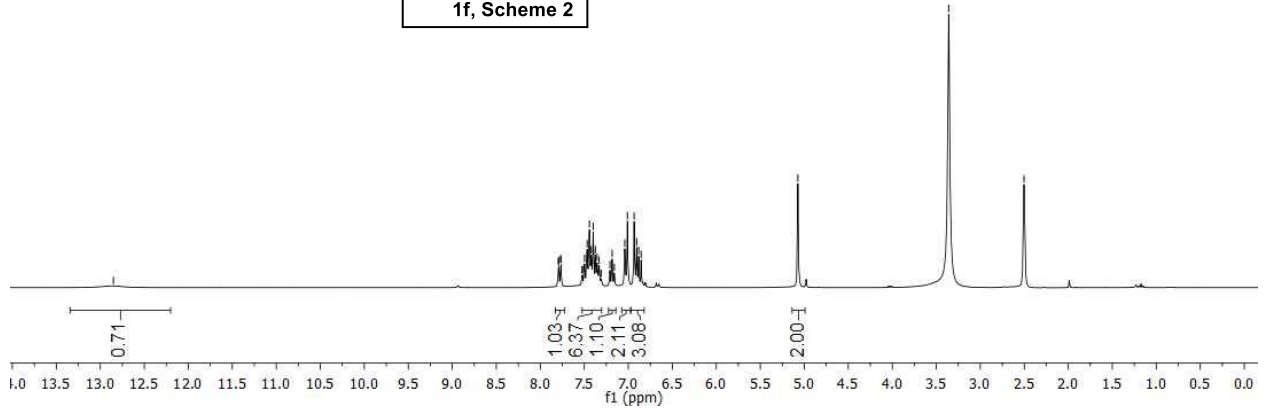

AH-382-C/1

—166.85

—156.26

—154.48

—150.44

137.12

133.32

131.26

128.49

127.90

127.77

123.71

123.03

119.86

119.23

115.99

—69.70

40.36

40.09

39.81

39.53

39.25

38.97

38.70

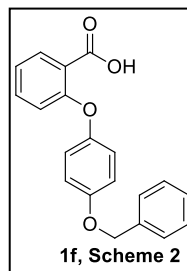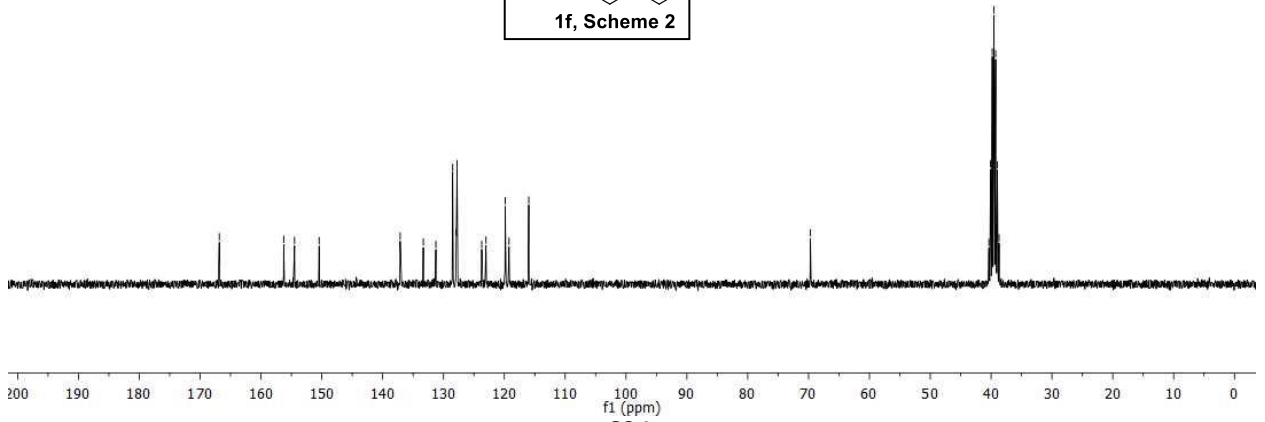



AH-390-1H/1

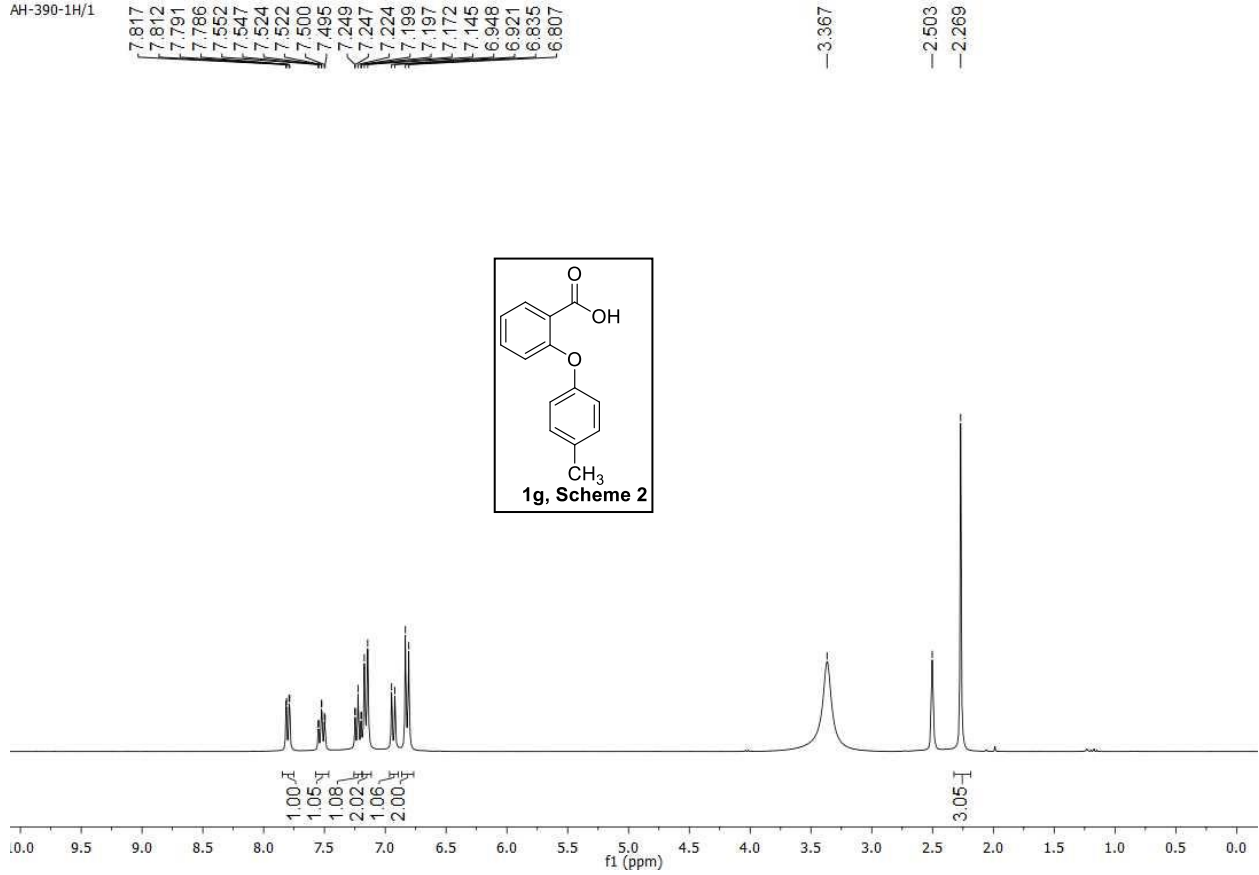

AH-390-C/1

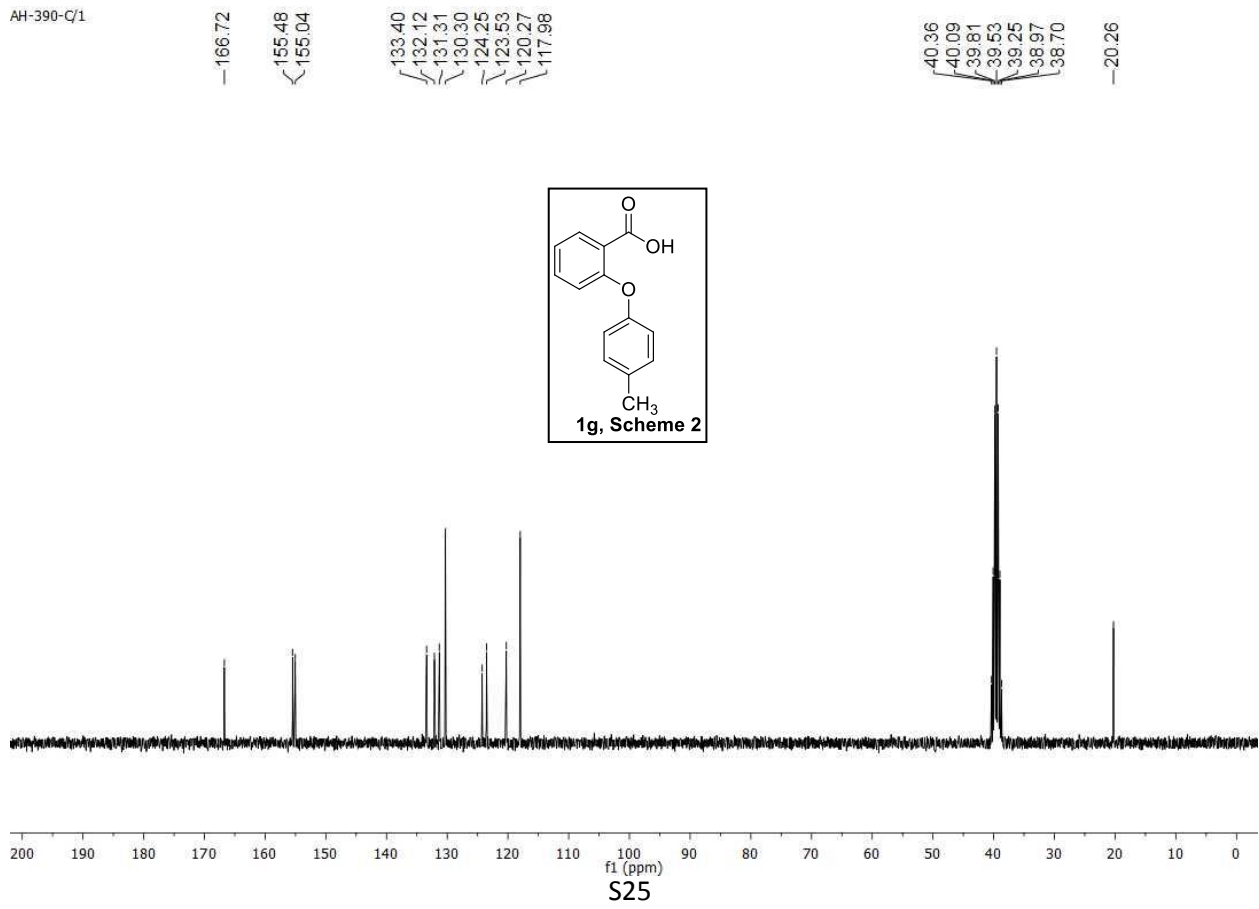

AH-408-1H/1  
-12.937

7.878  
7.853  
7.653  
7.627  
7.608  
7.576  
7.468  
7.443  
7.418  
7.353  
7.332  
7.308  
7.284  
7.119  
7.092  
6.985  
6.957

-3.380  
-2.502

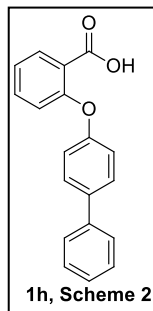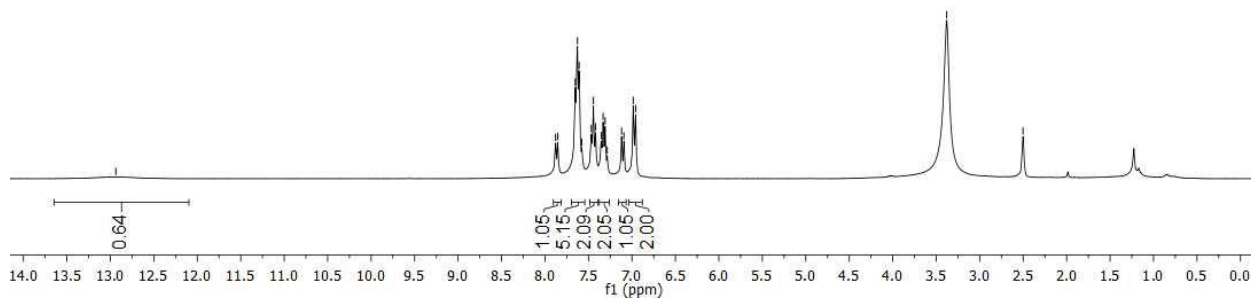

AH-408-C.1.fid

166.98  
157.84  
155.08  
140.04  
135.22  
134.17  
131.96  
129.42  
128.62  
127.58  
126.90  
125.23  
124.84  
122.02  
118.22  
40.79  
40.51  
40.24  
39.96  
39.68  
39.40  
39.13

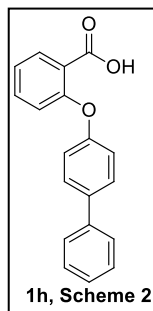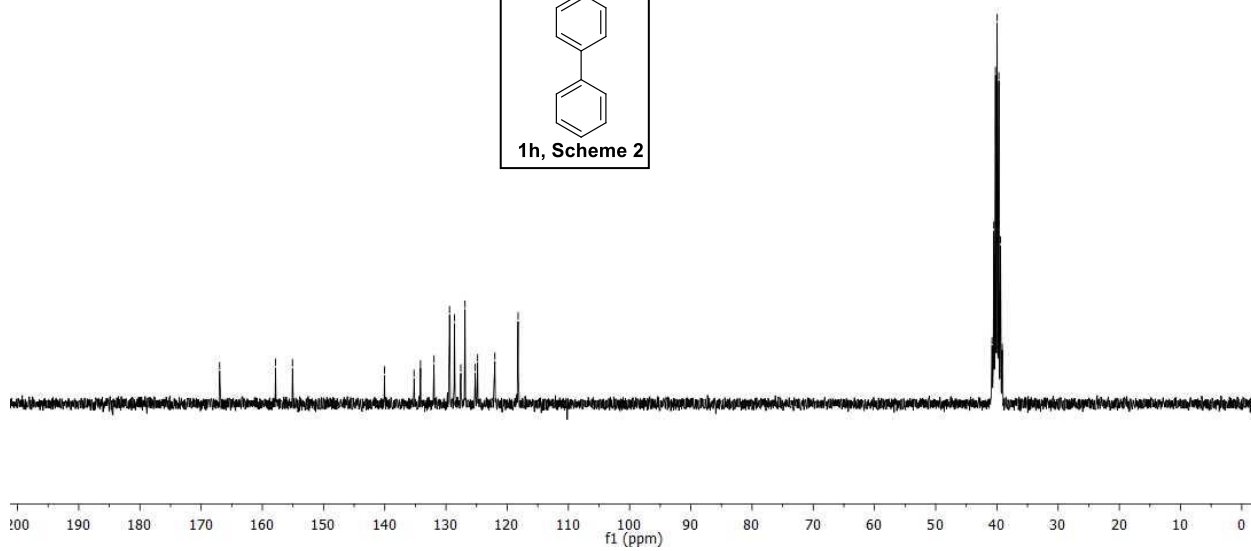

AH-378-1K  
7.954  
7.926  
7.903  
7.878  
7.786  
7.760  
7.632  
7.605  
7.581  
7.489  
7.467  
7.437  
7.410  
7.388  
7.349  
7.324  
7.283  
7.276  
7.253  
7.246  
7.196  
7.134  
7.106

—3.380

—2.503

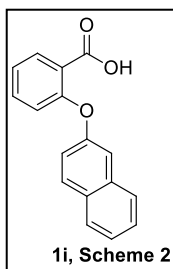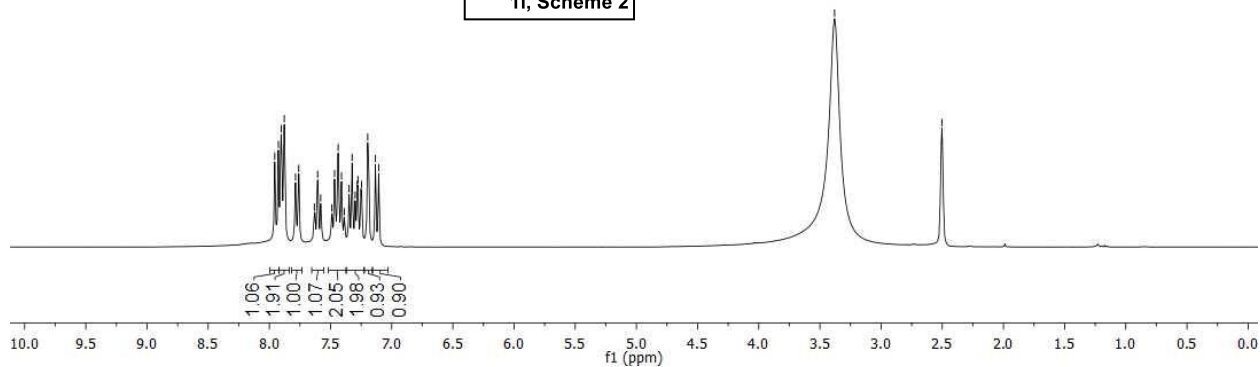

AH-378-C/1

166.59  
155.63  
154.79  
133.96  
133.75  
131.63  
130.00  
129.55  
127.68  
127.03  
126.71  
124.72  
124.67  
124.39  
121.54  
119.30  
112.08

40.35  
40.07  
39.79  
39.52  
39.24  
38.96  
38.68

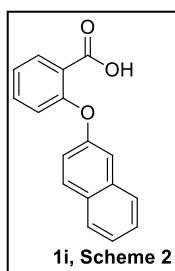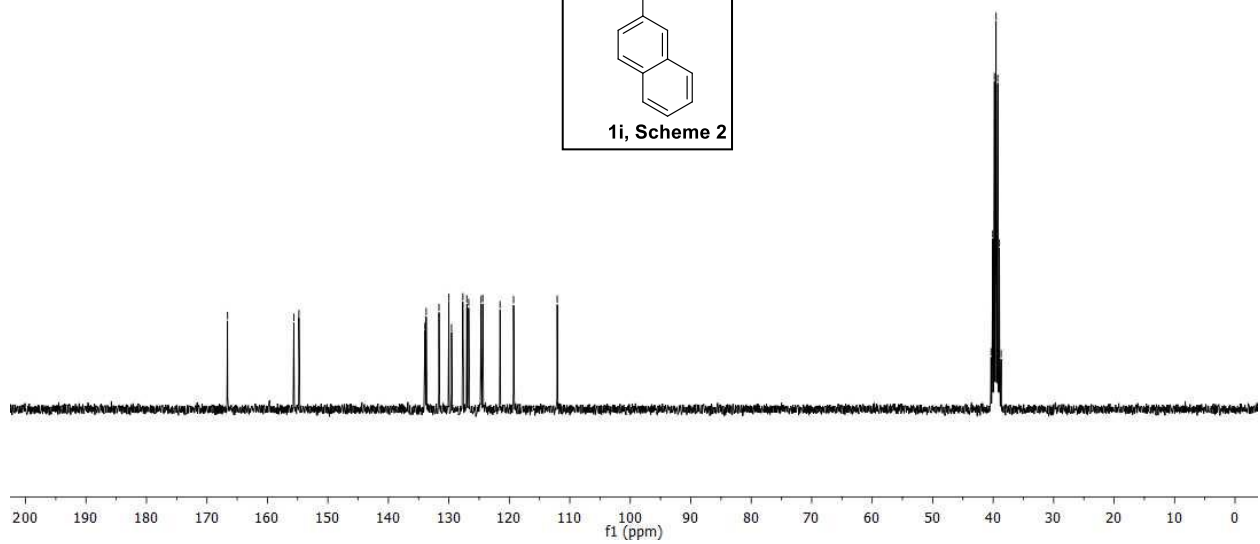

8.17  
 8.15  
 7.87  
 7.85  
 7.83  
 7.81  
 7.79  
 7.77  
 7.75  
 7.73  
 7.71  
 7.69  
 7.67  
 7.65  
 7.63  
 7.61  
 7.59  
 7.57  
 7.55  
 7.53  
 7.51  
 7.49  
 7.47  
 7.45  
 7.43  
 7.41  
 7.39  
 7.37  
 7.35  
 7.33  
 7.31  
 7.29  
 7.27  
 7.25  
 7.23  
 7.21  
 7.19  
 7.17  
 7.15  
 7.13  
 7.11  
 7.09  
 7.07  
 7.05  
 7.03  
 7.01  
 6.99  
 6.97  
 6.95  
 6.93  
 6.91  
 6.89  
 6.87  
 6.85  
 6.83  
 6.81  
 6.79  
 6.77  
 6.75  
 6.73  
 6.71  
 6.69  
 6.67  
 6.65  
 6.63  
 6.61  
 6.59  
 6.57  
 6.55  
 6.53  
 6.51  
 6.49  
 6.47  
 6.45  
 6.43  
 6.41  
 6.39  
 6.37  
 6.35  
 6.33  
 6.31  
 6.29  
 6.27  
 6.25  
 6.23  
 6.21  
 6.19  
 6.17  
 6.15  
 6.13  
 6.11  
 6.09  
 6.07  
 6.05  
 6.03  
 6.01  
 5.99  
 5.97  
 5.95  
 5.93  
 5.91  
 5.89  
 5.87  
 5.85  
 5.83  
 5.81  
 5.79  
 5.77  
 5.75  
 5.73  
 5.71  
 5.69  
 5.67  
 5.65  
 5.63  
 5.61  
 5.59  
 5.57  
 5.55  
 5.53  
 5.51  
 5.49  
 5.47  
 5.45  
 5.43  
 5.41  
 5.39  
 5.37  
 5.35  
 5.33  
 5.31  
 5.29  
 5.27  
 5.25  
 5.23  
 5.21  
 5.19  
 5.17  
 5.15  
 5.13  
 5.11  
 5.09  
 5.07  
 5.05  
 5.03  
 5.01  
 4.99  
 4.97  
 4.95  
 4.93  
 4.91  
 4.89  
 4.87  
 4.85  
 4.83  
 4.81  
 4.79  
 4.77  
 4.75  
 4.73  
 4.71  
 4.69  
 4.67  
 4.65  
 4.63  
 4.61  
 4.59  
 4.57  
 4.55  
 4.53  
 4.51  
 4.49  
 4.47  
 4.45  
 4.43  
 4.41  
 4.39  
 4.37  
 4.35  
 4.33  
 4.31  
 4.29  
 4.27  
 4.25  
 4.23  
 4.21  
 4.19  
 4.17  
 4.15  
 4.13  
 4.11  
 4.09  
 4.07  
 4.05  
 4.03  
 4.01  
 3.99  
 3.97  
 3.95  
 3.93  
 3.91  
 3.89  
 3.87  
 3.85  
 3.83  
 3.81  
 3.79  
 3.77  
 3.75  
 3.73  
 3.71  
 3.69  
 3.67  
 3.65  
 3.63  
 3.61  
 3.59  
 3.57  
 3.55  
 3.53  
 3.51  
 3.49  
 3.47  
 3.45  
 3.43  
 3.41  
 3.39  
 3.37  
 3.35  
 3.33  
 3.31  
 3.29  
 3.27  
 3.25  
 3.23  
 3.21  
 3.19  
 3.17  
 3.15  
 3.13  
 3.11  
 3.09  
 3.07  
 3.05  
 3.03  
 3.01  
 2.99  
 2.97  
 2.95  
 2.93  
 2.91  
 2.89  
 2.87  
 2.85  
 2.83  
 2.81  
 2.79  
 2.77  
 2.75  
 2.73  
 2.71  
 2.69  
 2.67  
 2.65  
 2.63  
 2.61  
 2.59  
 2.57  
 2.55  
 2.53  
 2.51  
 2.49  
 2.47  
 2.45  
 2.43  
 2.41  
 2.39  
 2.37  
 2.35  
 2.33  
 2.31  
 2.29  
 2.27  
 2.25  
 2.23  
 2.21  
 2.19  
 2.17  
 2.15  
 2.13  
 2.11  
 2.09  
 2.07  
 2.05  
 2.03  
 2.01  
 1.99  
 1.97  
 1.95  
 1.93  
 1.91  
 1.89  
 1.87  
 1.85  
 1.83  
 1.81  
 1.79  
 1.77  
 1.75  
 1.73  
 1.71  
 1.69  
 1.67  
 1.65  
 1.63  
 1.61  
 1.59  
 1.57  
 1.55  
 1.53  
 1.51  
 1.49  
 1.47  
 1.45  
 1.43  
 1.41  
 1.39  
 1.37  
 1.35  
 1.33  
 1.31  
 1.29  
 1.27  
 1.25  
 1.23  
 1.21  
 1.19  
 1.17  
 1.15  
 1.13  
 1.11  
 1.09  
 1.07  
 1.05  
 1.03  
 1.01  
 0.99  
 0.97  
 0.95  
 0.93  
 0.91  
 0.89  
 0.87  
 0.85  
 0.83  
 0.81  
 0.79  
 0.77  
 0.75  
 0.73  
 0.71  
 0.69  
 0.67  
 0.65  
 0.63  
 0.61  
 0.59  
 0.57  
 0.55  
 0.53  
 0.51  
 0.49  
 0.47  
 0.45  
 0.43  
 0.41  
 0.39  
 0.37  
 0.35  
 0.33  
 0.31  
 0.29  
 0.27  
 0.25  
 0.23  
 0.21  
 0.19  
 0.17  
 0.15  
 0.13  
 0.11  
 0.09  
 0.07  
 0.05  
 0.03  
 0.01  
 0.00

-3.459

-2.503

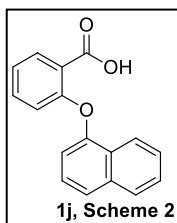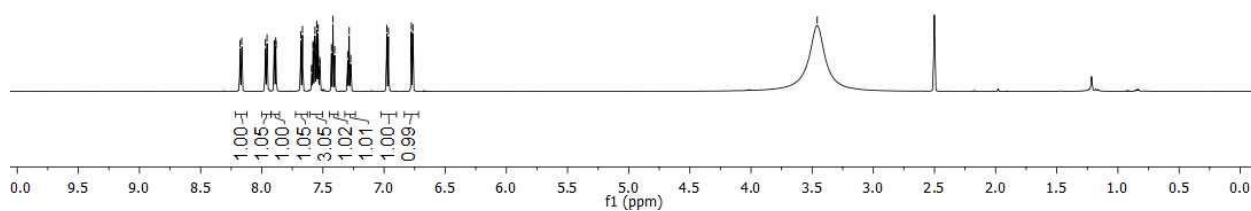

NMR DATA/AH-536 C  
AH-536 13C-NMR in DMSO

167.00  
 155.68  
 153.36  
 134.92  
 134.03  
 131.93  
 128.16  
 127.22  
 126.54  
 126.46  
 126.00  
 124.48  
 124.37  
 123.27  
 122.05  
 120.72  
 -112.21

40.26  
 40.12  
 39.98  
 39.85  
 39.71  
 39.57  
 39.43

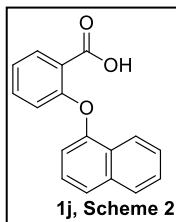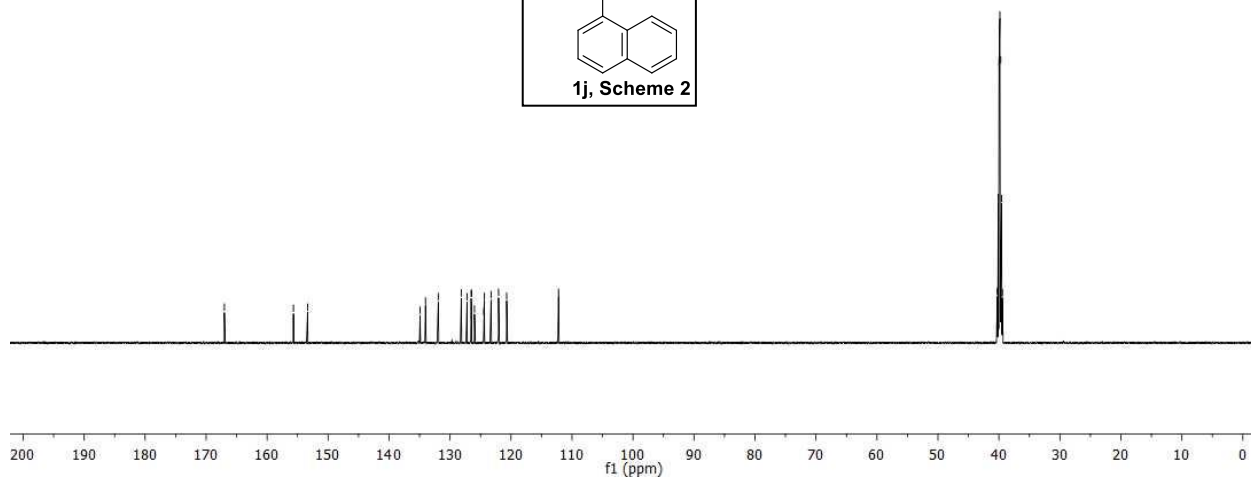

AH-399-1H/1

-12.860

7.828  
7.823  
7.802  
7.797  
7.750  
7.524  
7.501  
7.478  
7.472  
7.309  
7.285  
7.221  
7.196  
7.171  
7.149  
7.080  
7.055  
7.032  
6.812  
6.785  
6.742  
6.716

-3.369

-2.503

-2.196

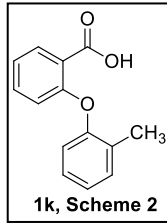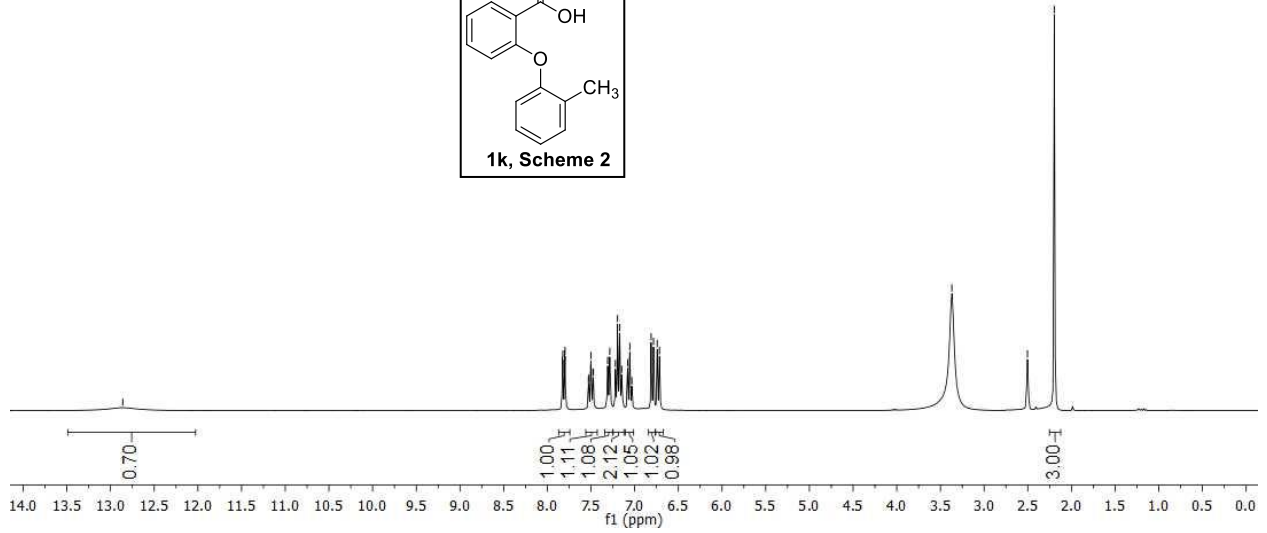

AH-399-C/1

-167.14

156.00  
155.05

133.78

131.80

128.87

127.73

124.05

123.75

123.42

119.23

118.36

40.73

40.45

40.17

39.89

39.62

39.34

39.06

-16.23

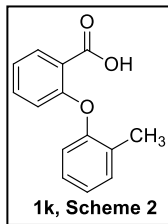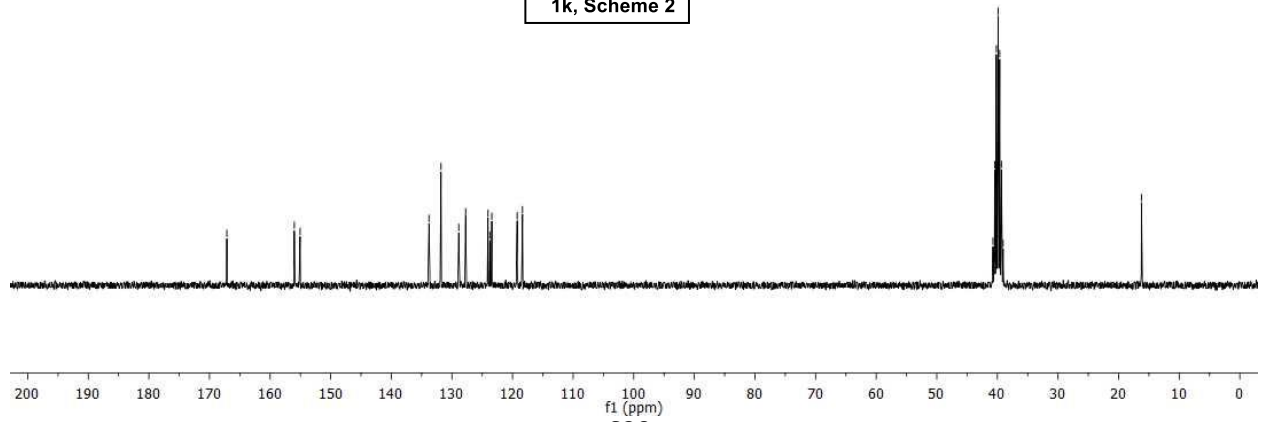

AH-374-1H/1  
AH-374 1H in DMSO-d6 21.05.15

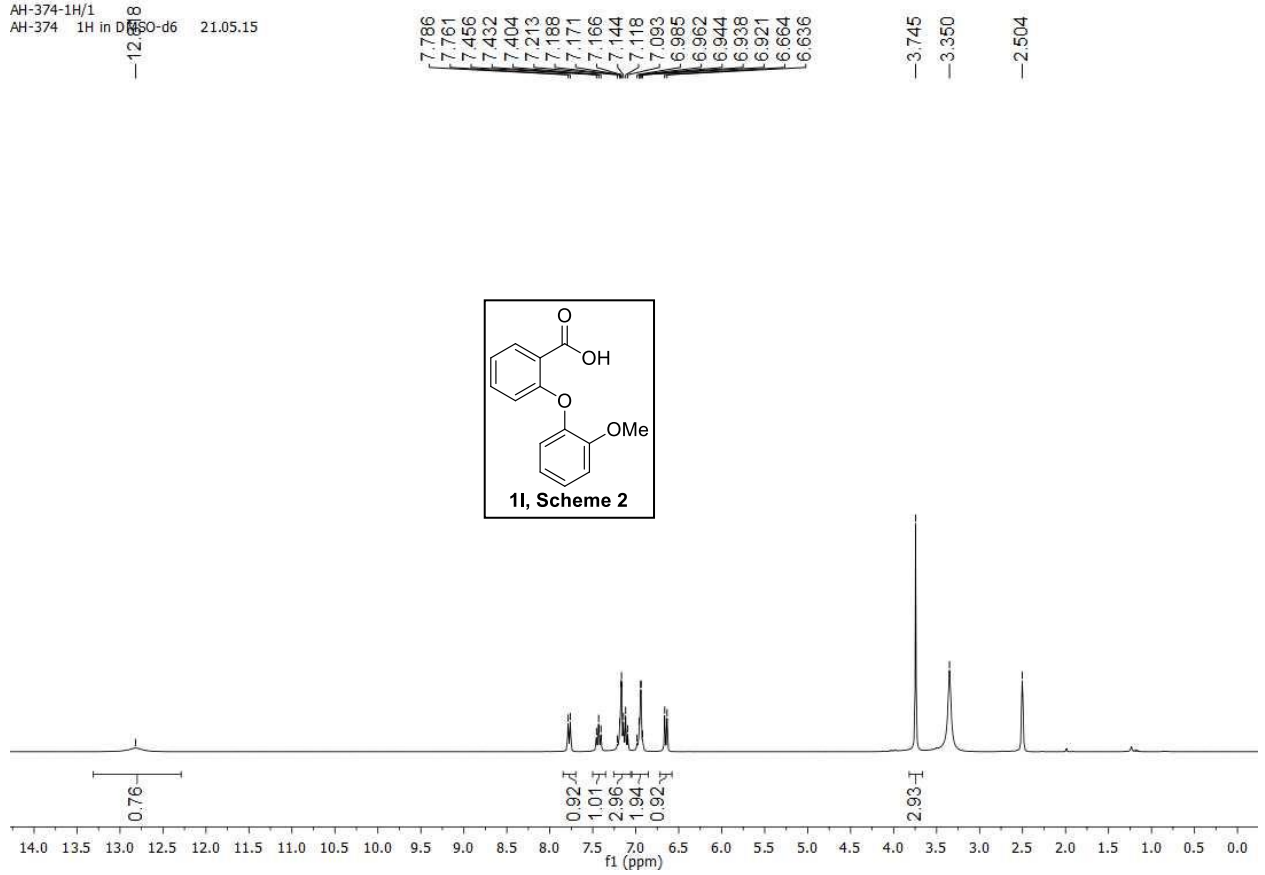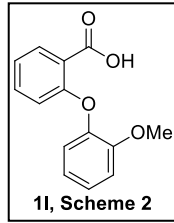

AH-374-C/1

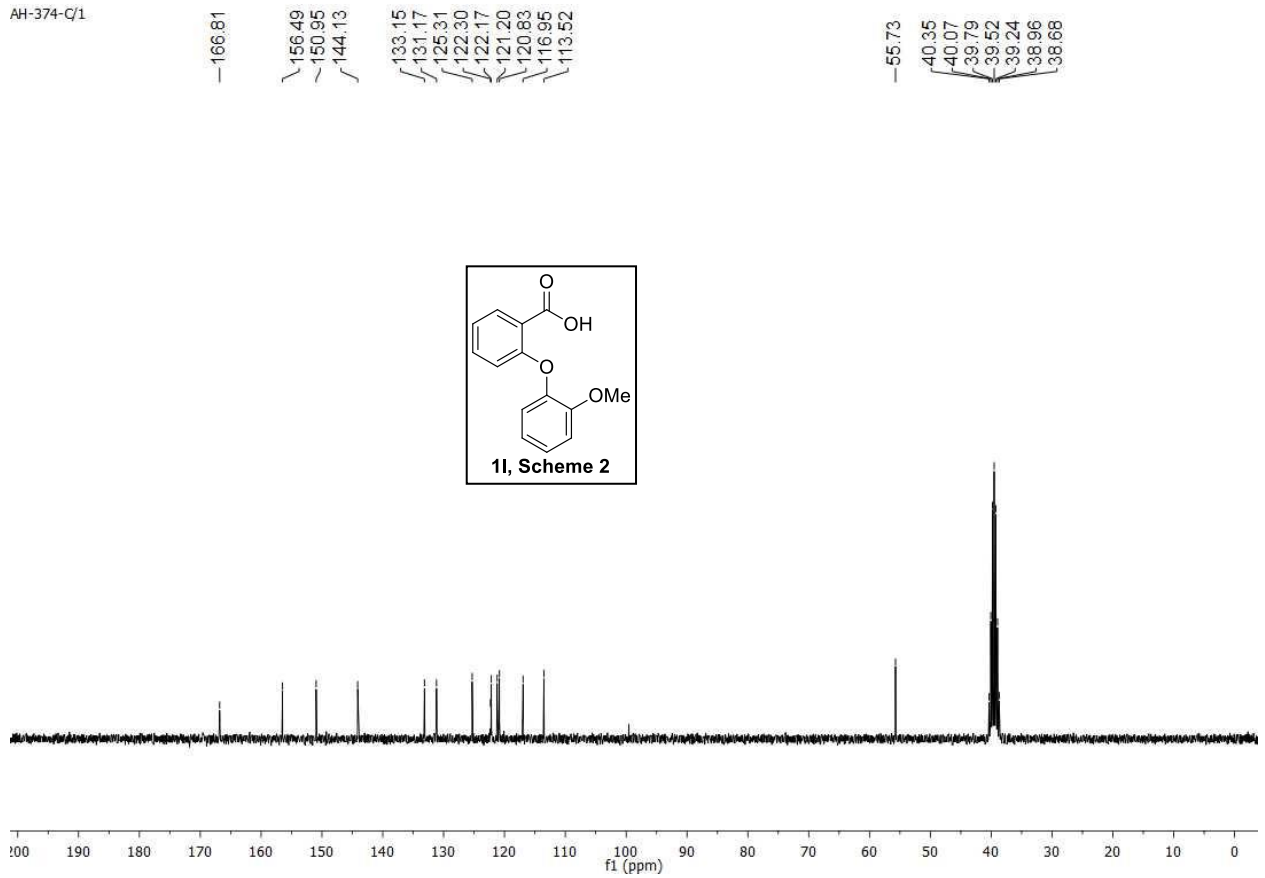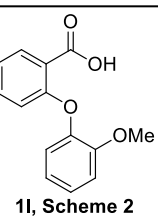

AH-380-1H/1  
—12.966

7.890  
7.864  
7.651  
7.626  
7.601  
7.386  
7.374  
7.359  
7.349  
7.332  
7.324  
7.149  
7.123  
6.918  
6.845  
6.838  
6.817  
6.811

—3.348  
—2.503

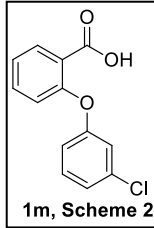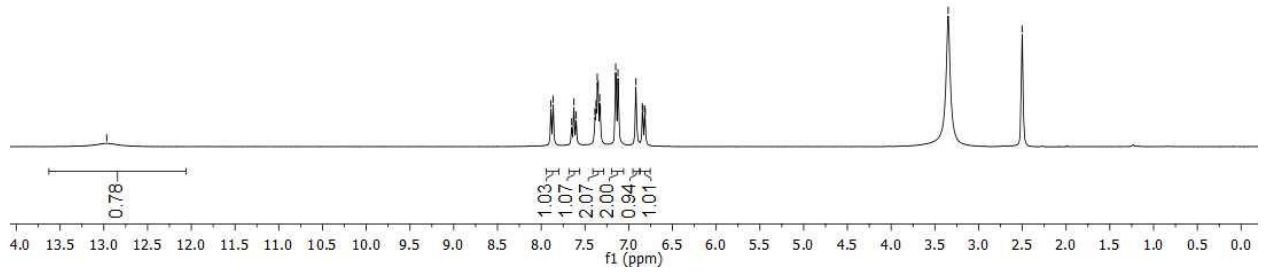

AH-380-C/1

—166.18  
—158.86  
—153.77

133.87  
133.83  
131.63  
131.21  
125.01  
124.87  
122.47  
122.07  
117.00  
115.66

40.33  
40.06  
39.78  
39.50  
39.22  
38.94  
38.67

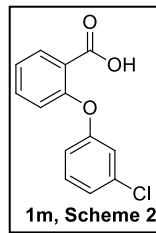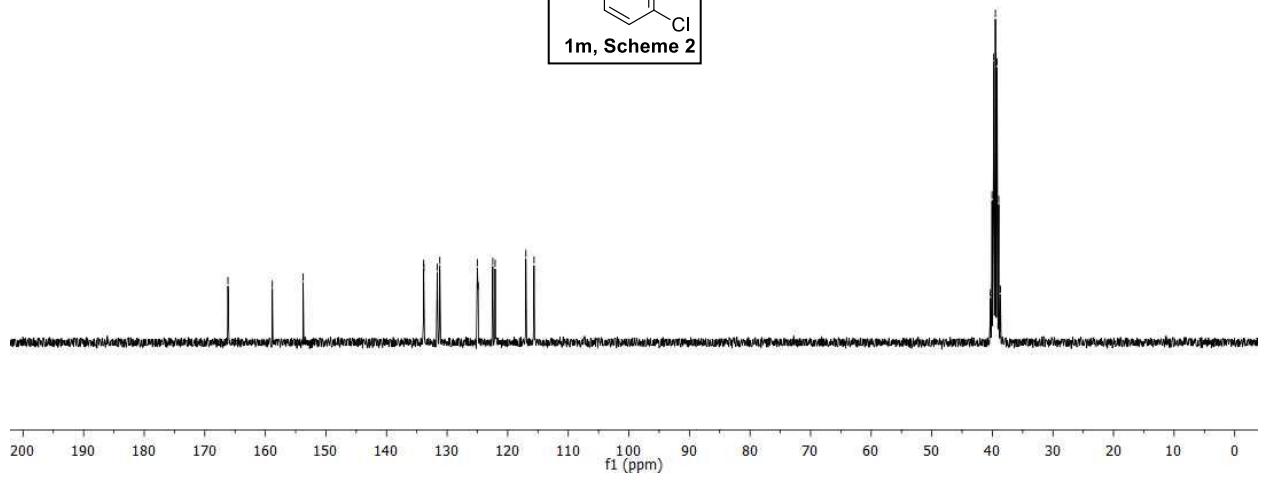

AH-383-1H/1

7.838  
7.813  
7.590  
7.566  
7.542  
7.298  
7.273  
7.238  
7.210  
7.045  
7.018  
6.686  
6.682  
6.659  
6.654  
6.490  
6.436  
6.409  
-3.721  
-3.364  
-2.503

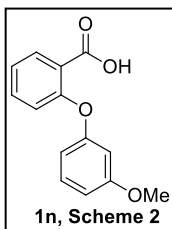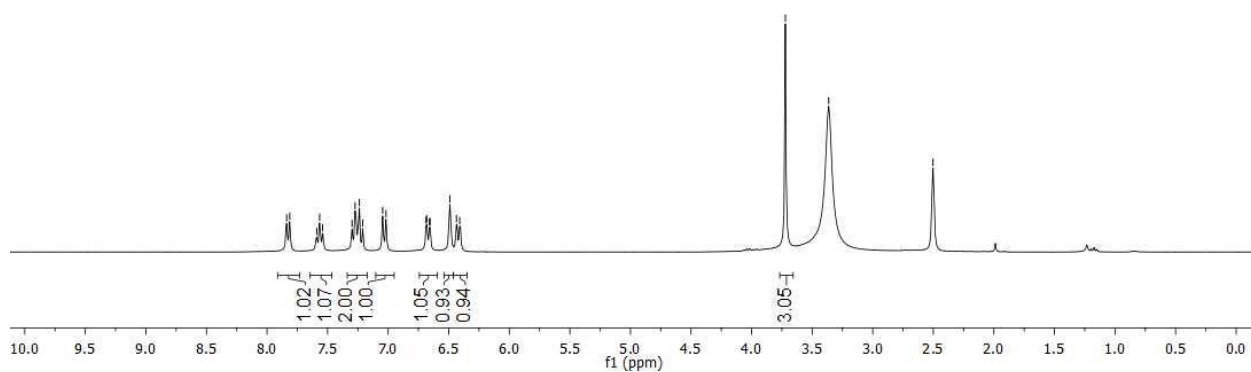

AH-383-C/1

166.56  
160.66  
158.70  
154.69  
133.54  
131.38  
130.38  
124.62  
124.13  
121.17  
109.60  
108.51  
103.88  
55.27  
40.36  
40.09  
39.81  
39.53  
39.25  
38.97  
38.70

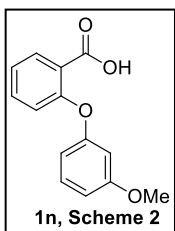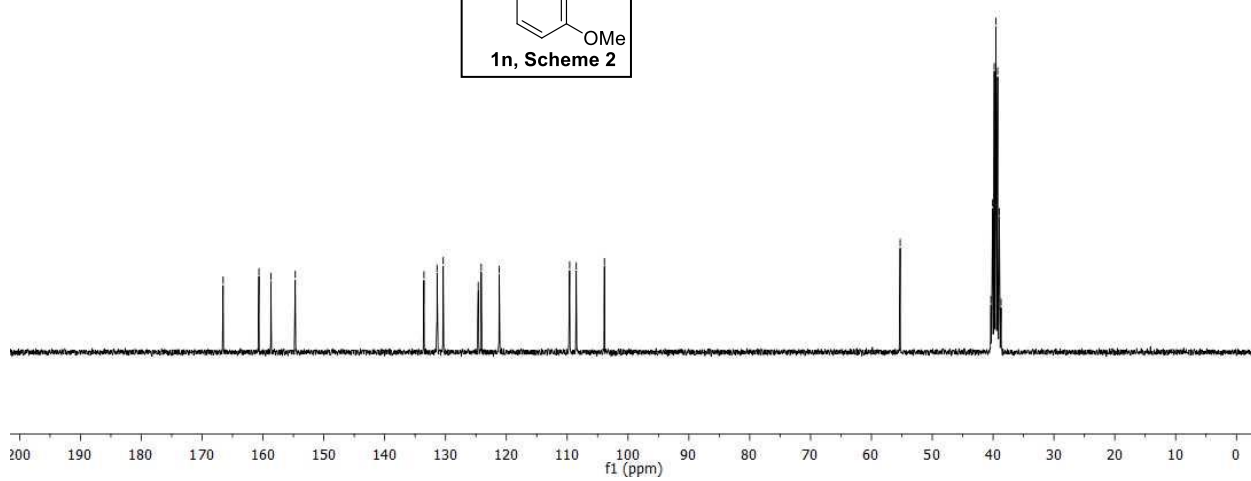



NMR DATA/AH-410 P  
AH410 1H-NMR in DMSO

7.941  
7.930  
7.927  
7.915  
7.897  
7.885  
7.873  
7.154  
7.141  
7.129  
7.121  
7.107  
7.093  
6.979  
6.966  
6.818  
6.801

3.416

2.500

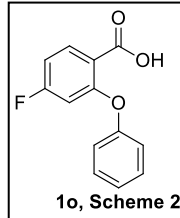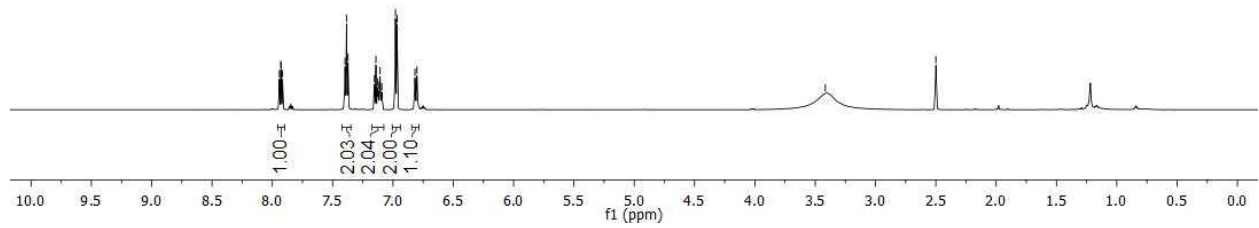

NMR DATA/AH-410 C  
AH-410 13C-NMR in DMSO

165.97  
165.80  
164.13  
157.53  
157.46  
157.02

134.30  
134.23  
130.47  
124.01  
120.93  
120.91  
118.51  
111.45  
111.30  
108.29  
108.12

40.31  
40.17  
40.03  
39.89  
39.75  
39.61  
39.47

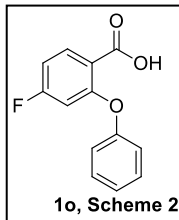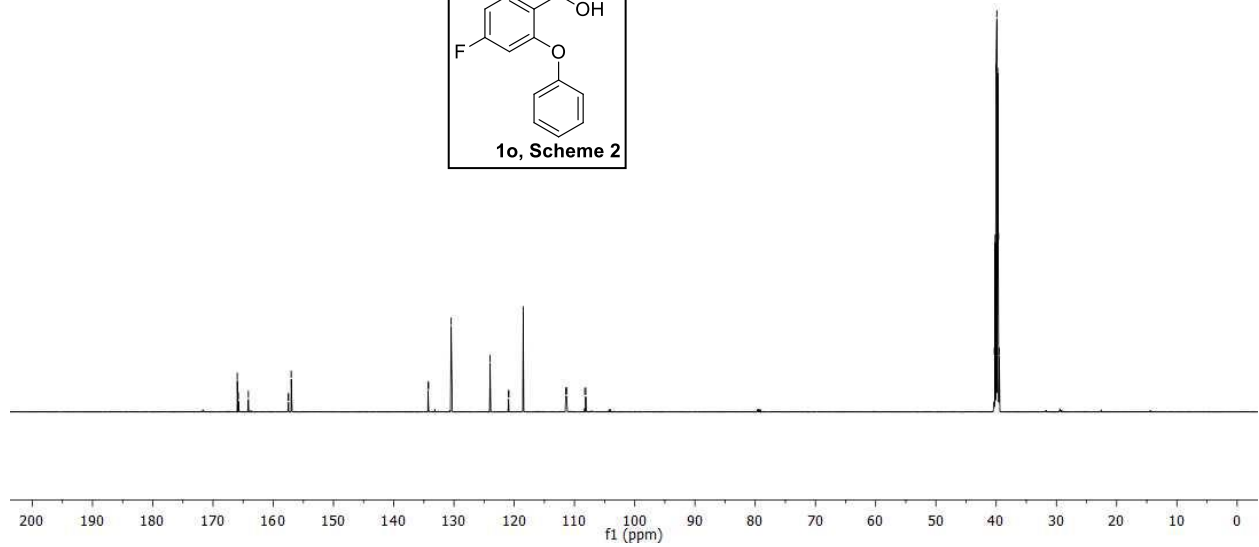

NMR DATA/AH-416 P  
AH416 1H-NMR in DMSO

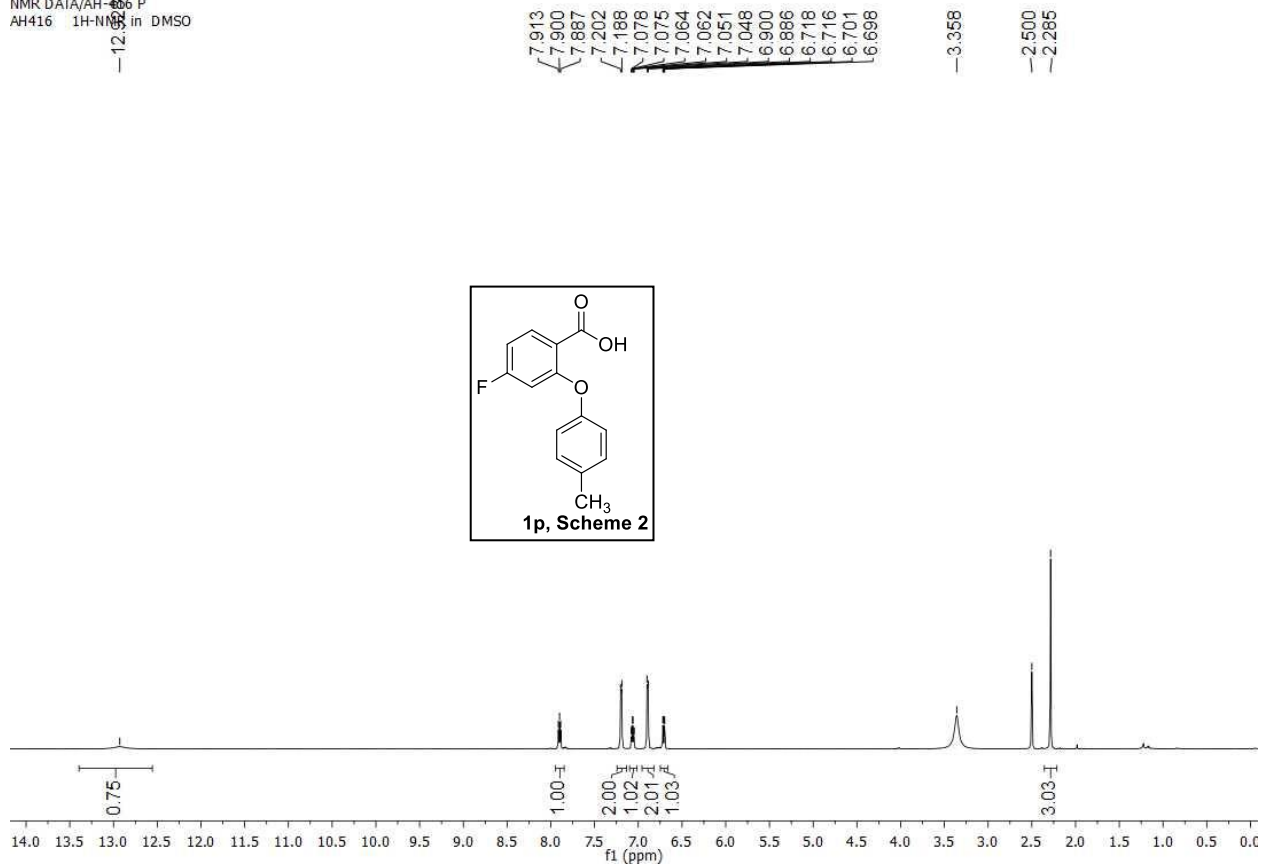

NMR DATA/AH-416 C  
AH-416 13C-NMR in DMSO

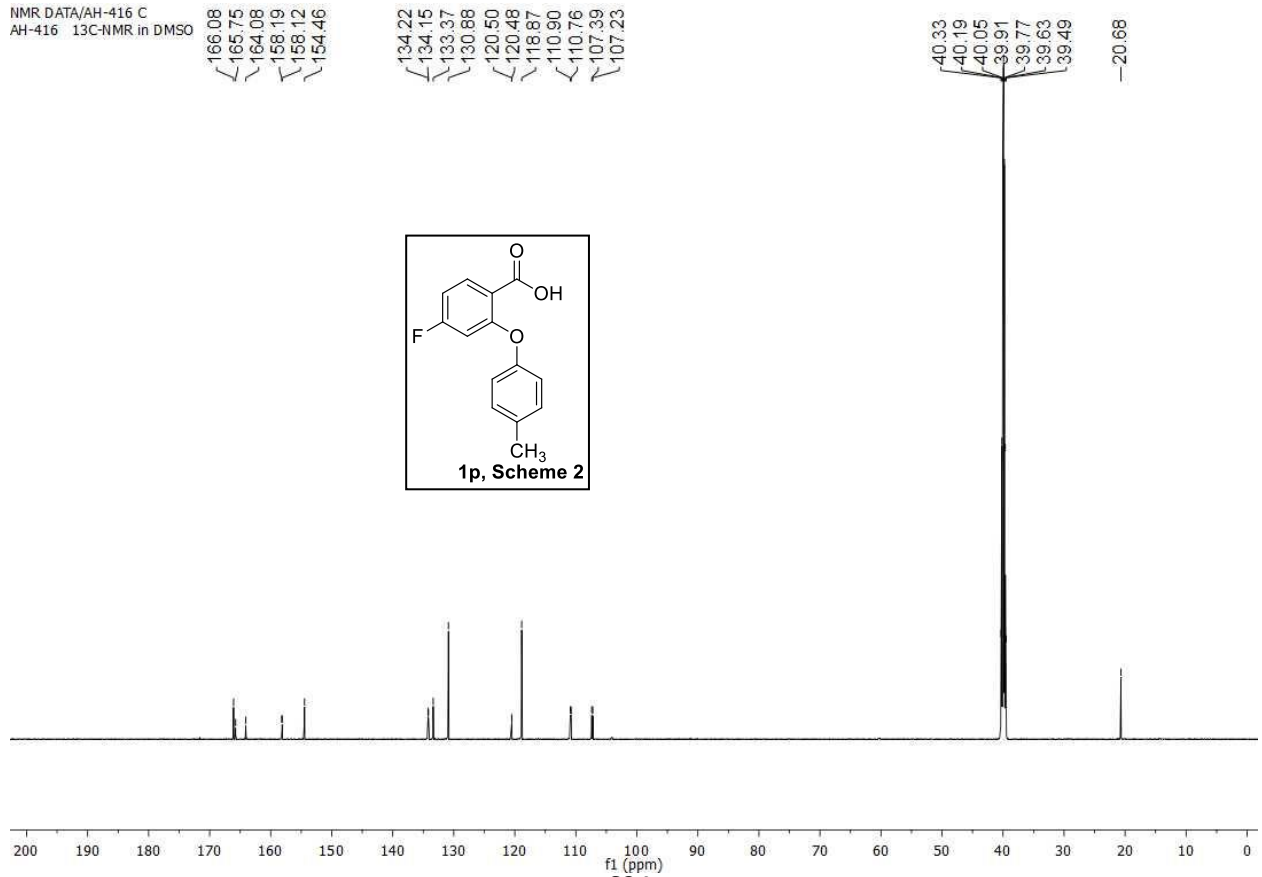

NMR DATA/AH-422 C  
 AH422 1H-NMR in DMSO  
 7.898  
 7.878  
 7.858  
 7.838  
 7.818  
 7.798  
 7.778  
 7.758  
 7.738  
 7.718  
 7.698  
 7.678  
 7.658  
 7.638  
 7.618  
 7.598  
 7.578  
 7.558  
 7.538  
 7.518  
 7.498  
 7.478  
 7.458  
 7.438  
 7.418  
 7.398  
 7.378  
 7.358  
 7.338  
 7.318  
 7.298  
 7.278  
 7.258  
 7.238  
 7.218  
 7.198  
 7.178  
 7.158  
 7.138  
 6.979  
 6.966  
 6.962

-3.400

-2.499

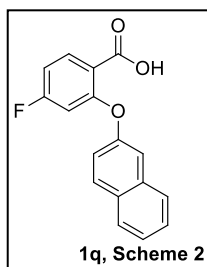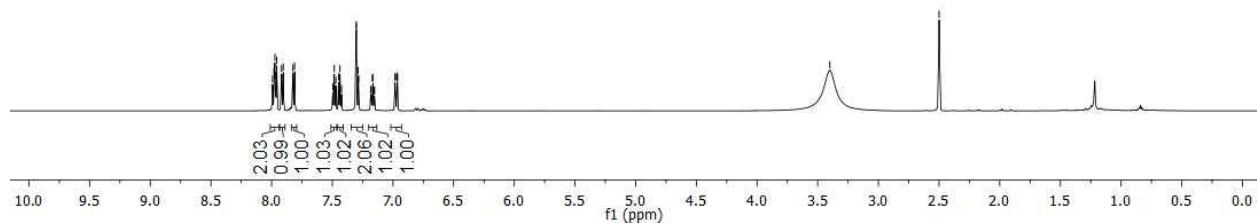

NMR DATA/AH-422 C  
 AH422 13C-NMR in DMSO

165.94  
 165.91  
 164.24  
 157.30  
 157.23  
 155.17  
 134.42  
 134.35  
 134.27  
 130.53  
 130.17  
 128.06  
 127.54  
 127.13  
 125.30  
 121.14  
 121.11  
 119.67  
 113.10  
 111.87  
 111.72  
 109.03  
 108.87

40.31  
 40.17  
 40.03  
 39.89  
 39.75  
 39.61  
 39.47

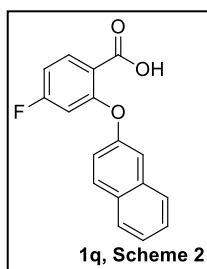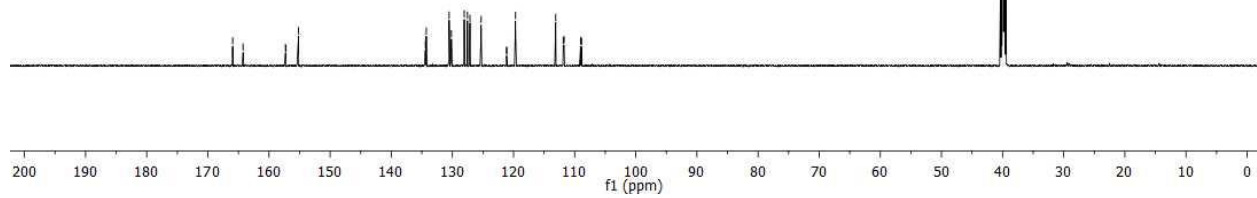

AH-396-1H/1

7.869  
7.842  
7.420  
7.395  
7.369  
7.349  
7.324  
7.175  
7.151  
7.127  
7.014  
6.988  
6.962

3.398

2.503

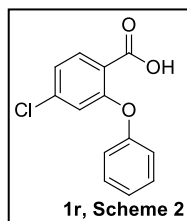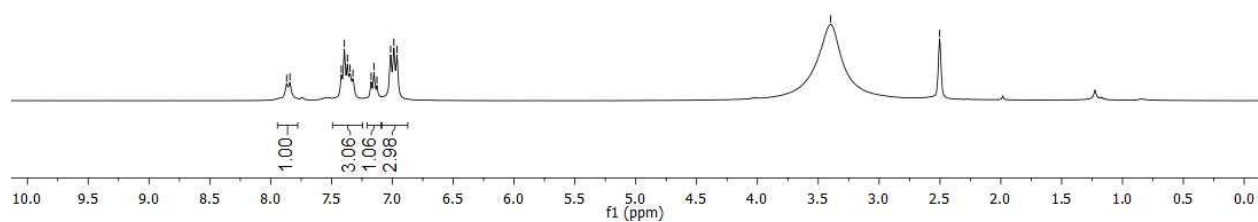

AH-396-C/1

157.01  
156.69  
156.65

137.83  
133.81  
130.52  
124.41  
124.09  
120.72  
118.61

99.96

40.73  
40.46  
40.18  
39.90  
39.62  
39.34  
39.07

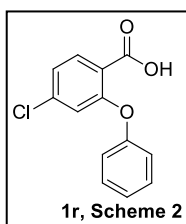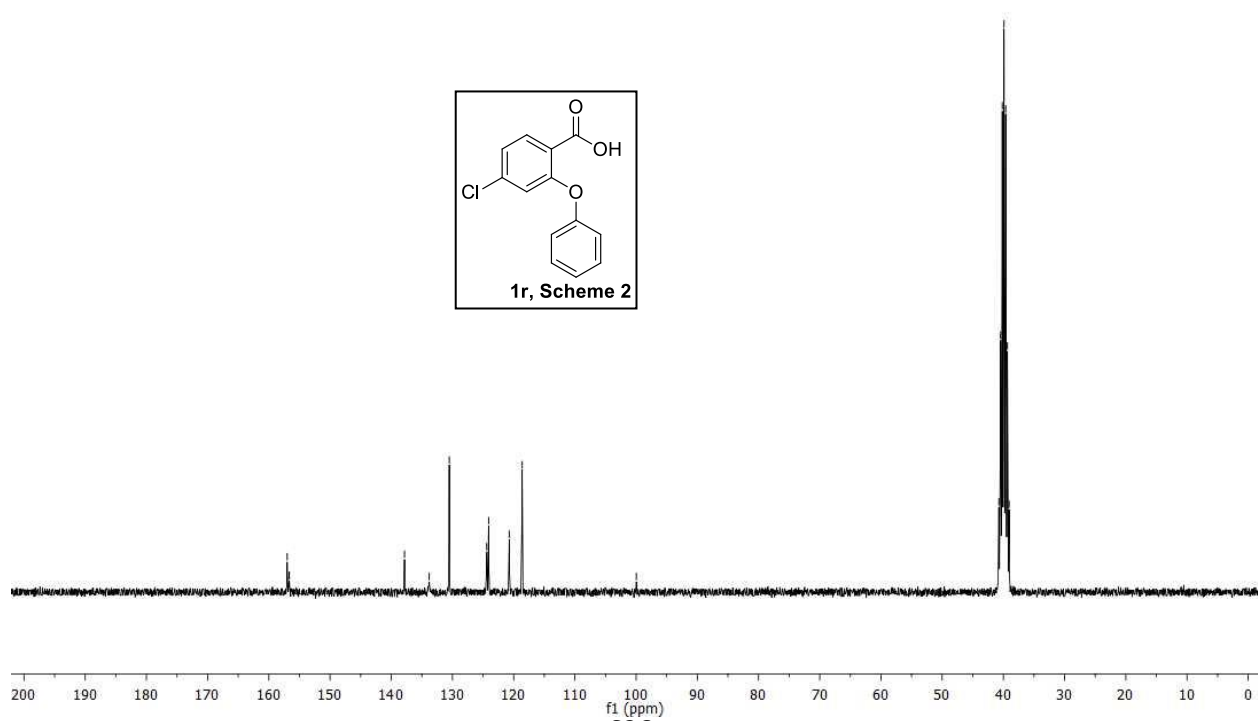

NMR DATA/AH-524 P  
AH-574 1H-NMR in DMSO

8.046  
8.032  
8.025  
8.012  
7.615  
7.461  
7.449  
7.437  
7.242  
7.230  
7.219  
7.098  
7.085

-3.397

-2.499

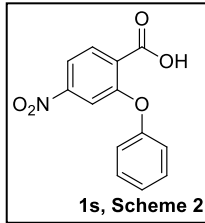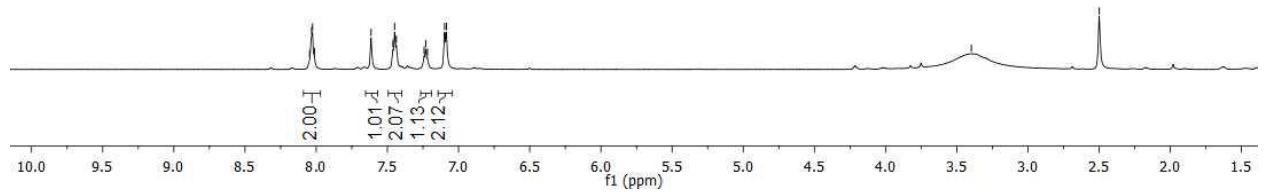

NMR DATA/AH-524 C  
AH-574 13C-NMR in DMSO

-165.98

156.21

155.91

150.19

132.64

130.78

130.57

124.94

119.36

118.50

114.29

40.31

40.17

40.04

39.90

39.76

39.62

39.48

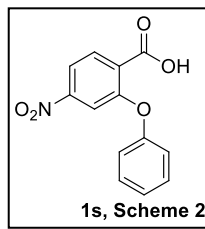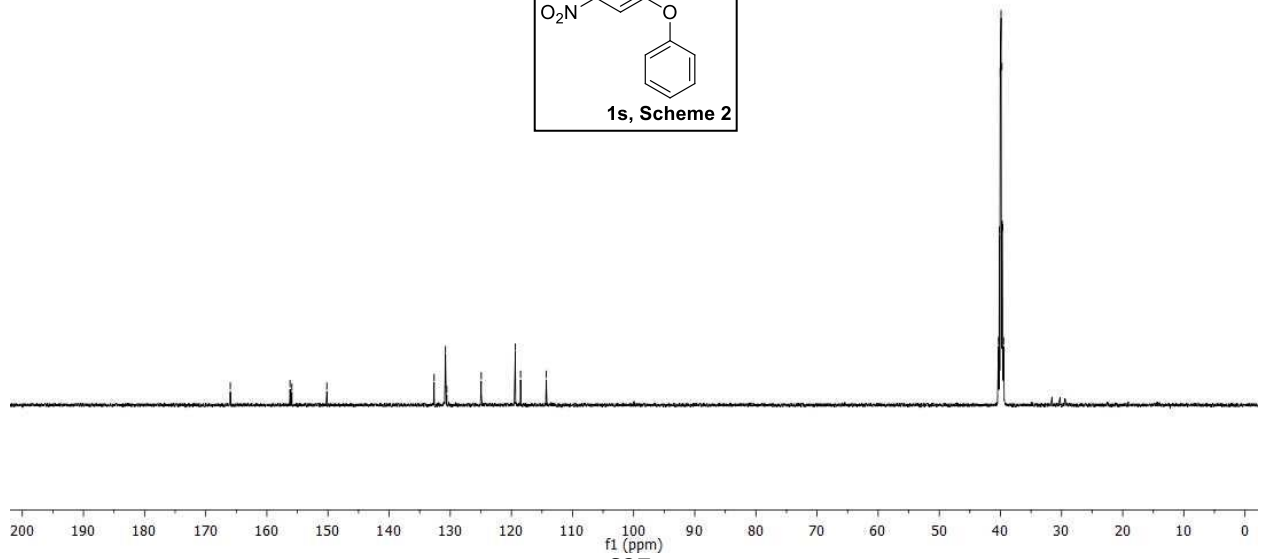

NMR DATA/AH-418 P  
AH418 1H-NMR in

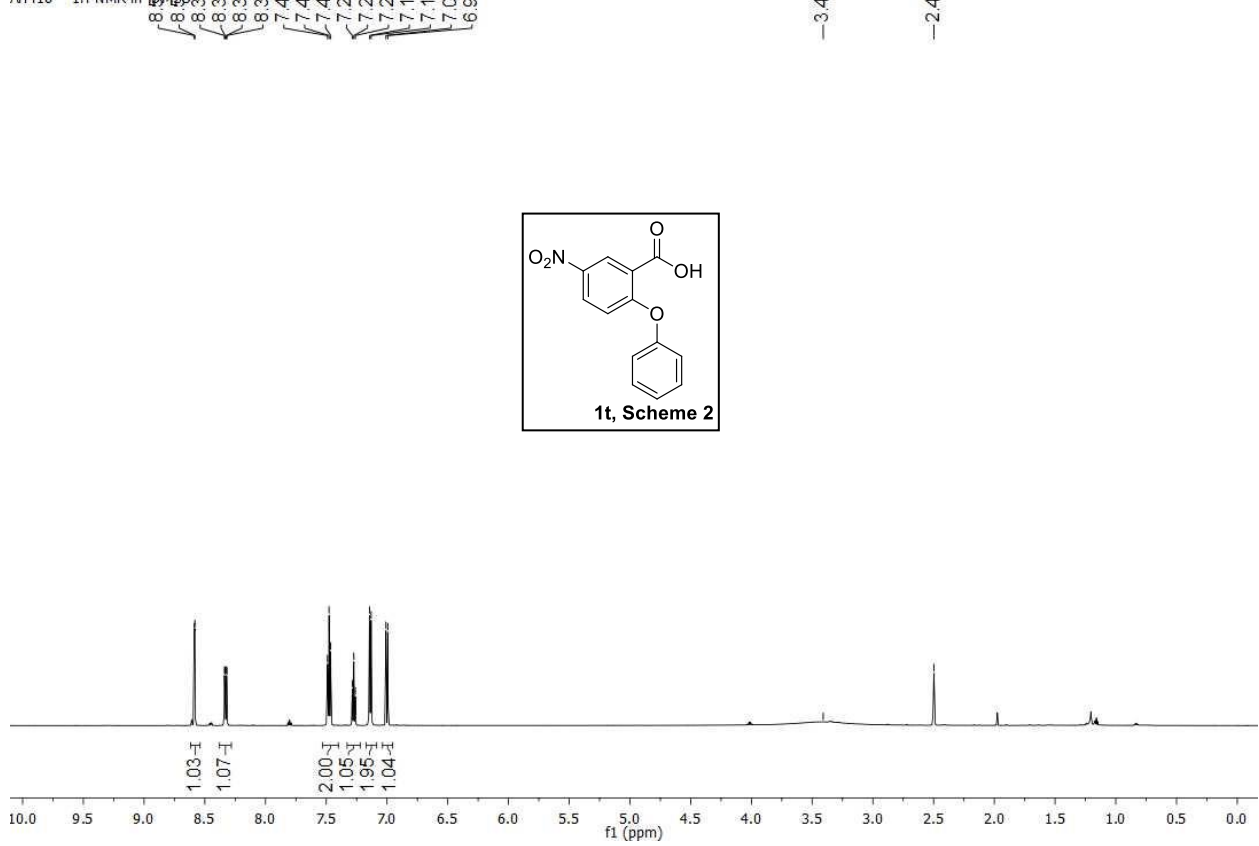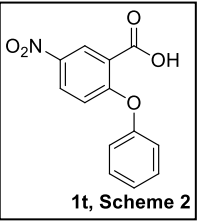

NMR DATA/AH-418 C  
AH418 13C-NMR in DMSO

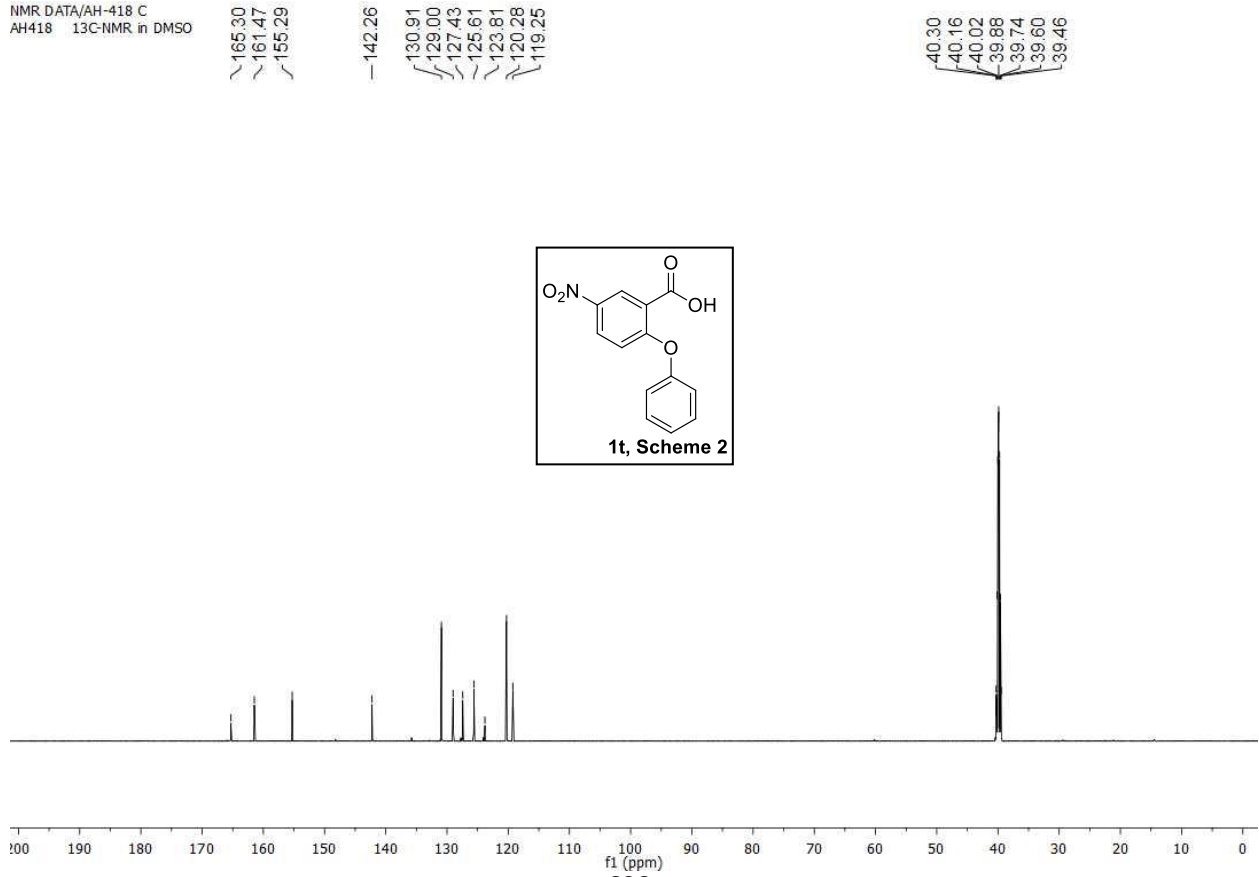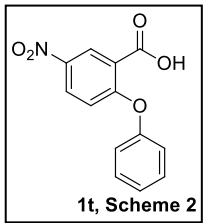

NMR DATA/AH-429 P  
AH429 1H-NMR in

8.528  
8.514  
8.359  
8.354  
8.344  
8.339  
7.522  
7.518  
7.510  
7.507  
7.176  
7.170  
7.166  
7.159  
7.155  
7.149  
7.116  
7.101

—3.360

—2.496

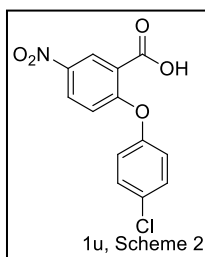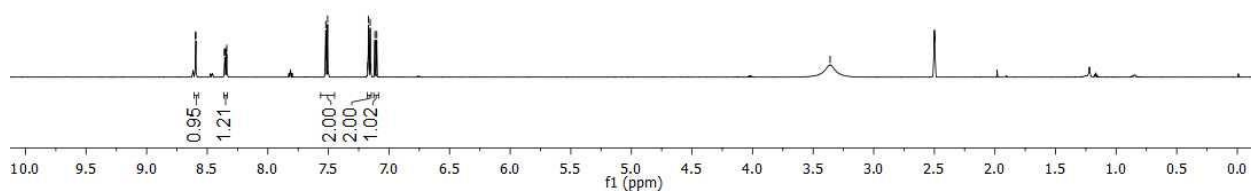

NMR DATA/AH-429 C  
AH429 13C-NMR in DMSO

165.13  
160.86  
164.49  
142.74  
130.71  
129.32  
129.12  
127.48  
124.12  
121.83  
120.08

40.32  
40.18  
40.05  
39.91  
39.77  
39.63  
39.49

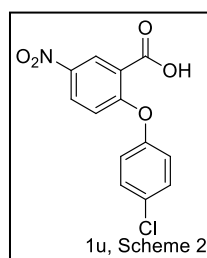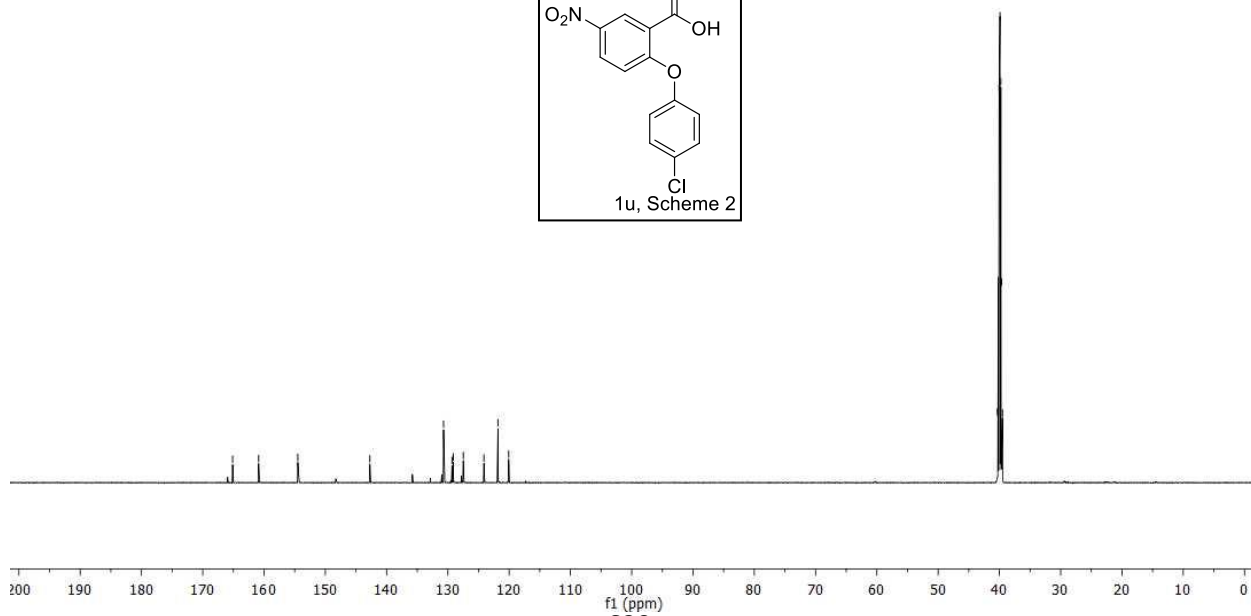

AH-609-1H/1

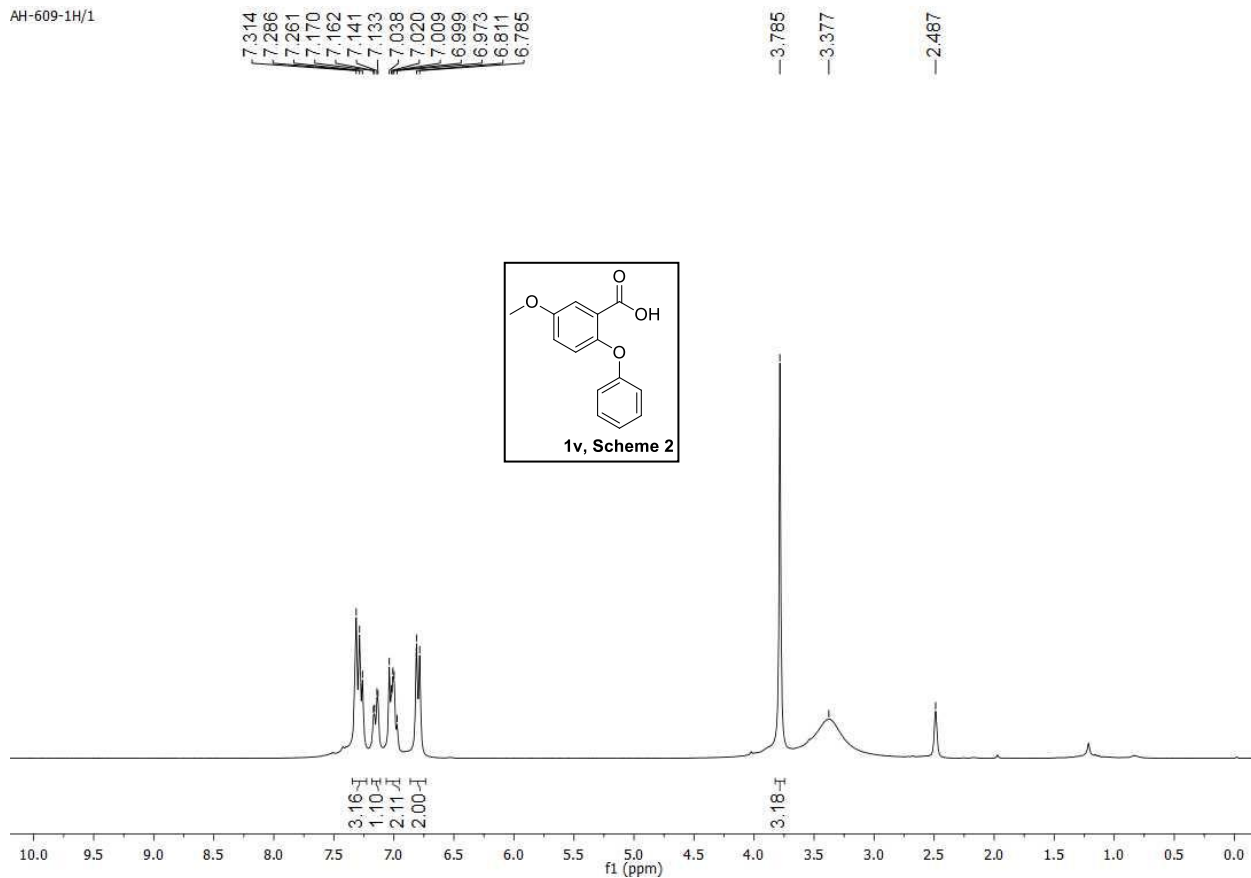

AH-609-C/1

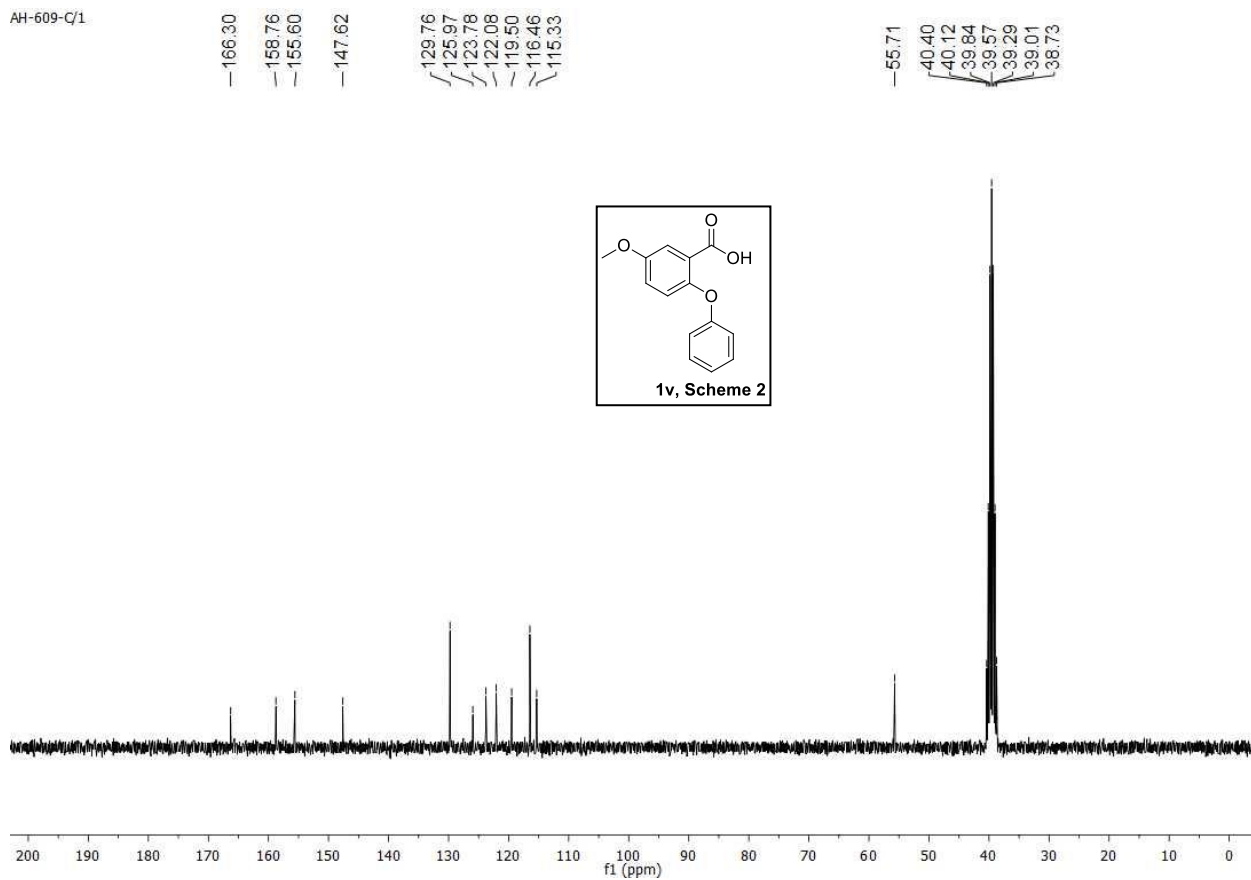



AH-610-1H/1

8.253  
8.249  
8.244  
8.238  
8.224  
8.218  
7.423  
7.396  
7.370  
7.232  
7.216  
7.208  
7.192  
7.168  
7.098  
7.072

-3.372

-2.488

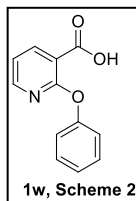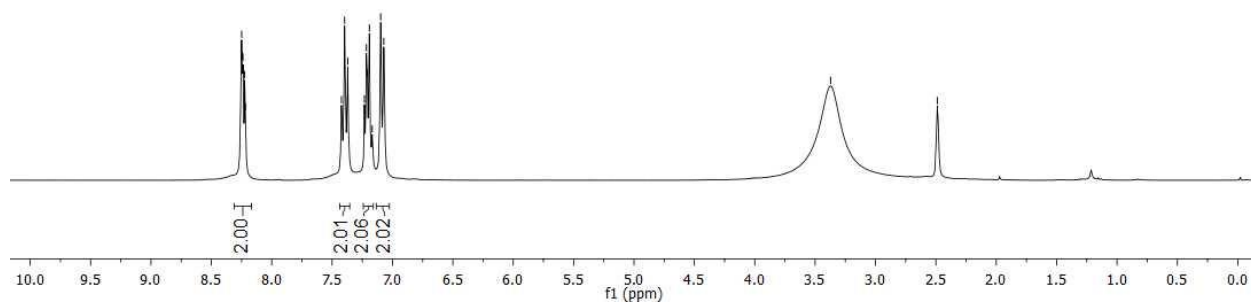

AH-610-C/1

-165.93  
-160.89  
-153.94  
-150.57  
-141.61  
-129.68  
-124.62  
-121.48  
-119.02  
-116.39

40.35  
40.08  
39.80  
39.52  
39.24  
38.96  
38.69

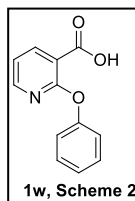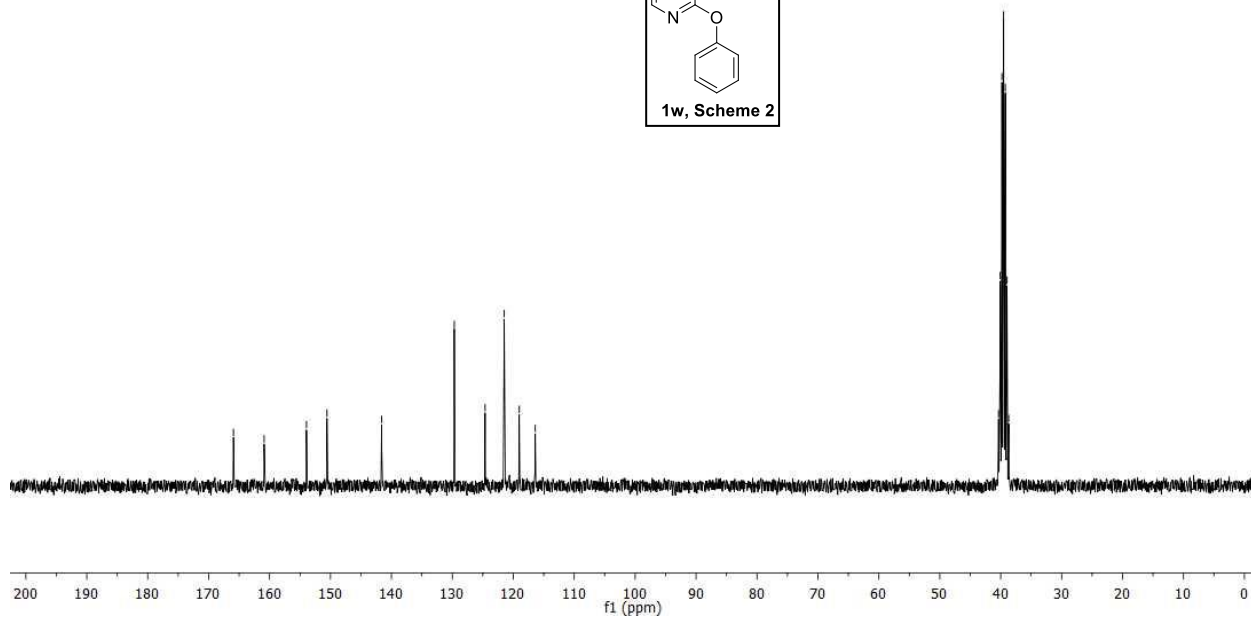

NMR DATA/AH-546 P  
AH-546 1H-NMR

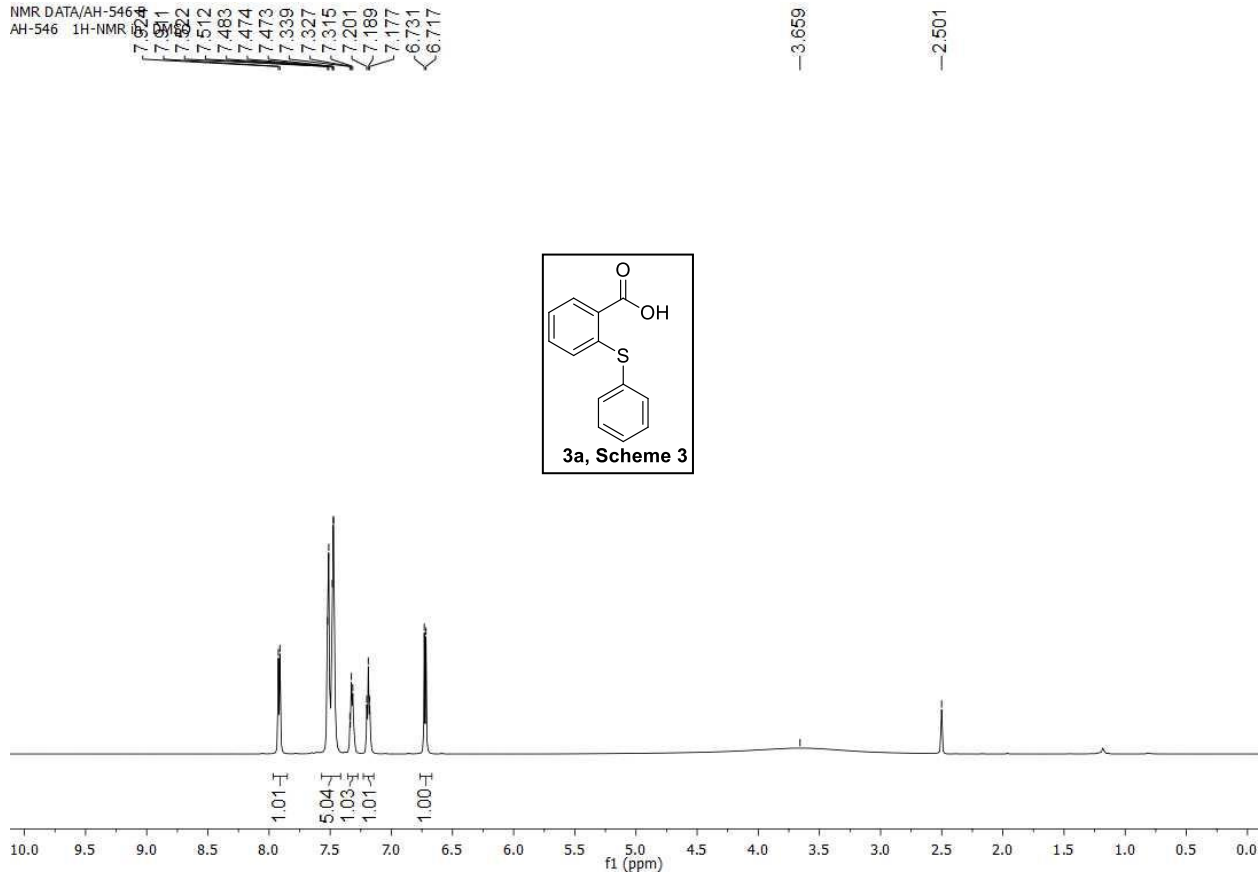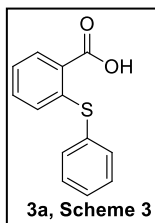

NMR DATA/AH-546 P  
AH-546 13C-NMR in DMSO

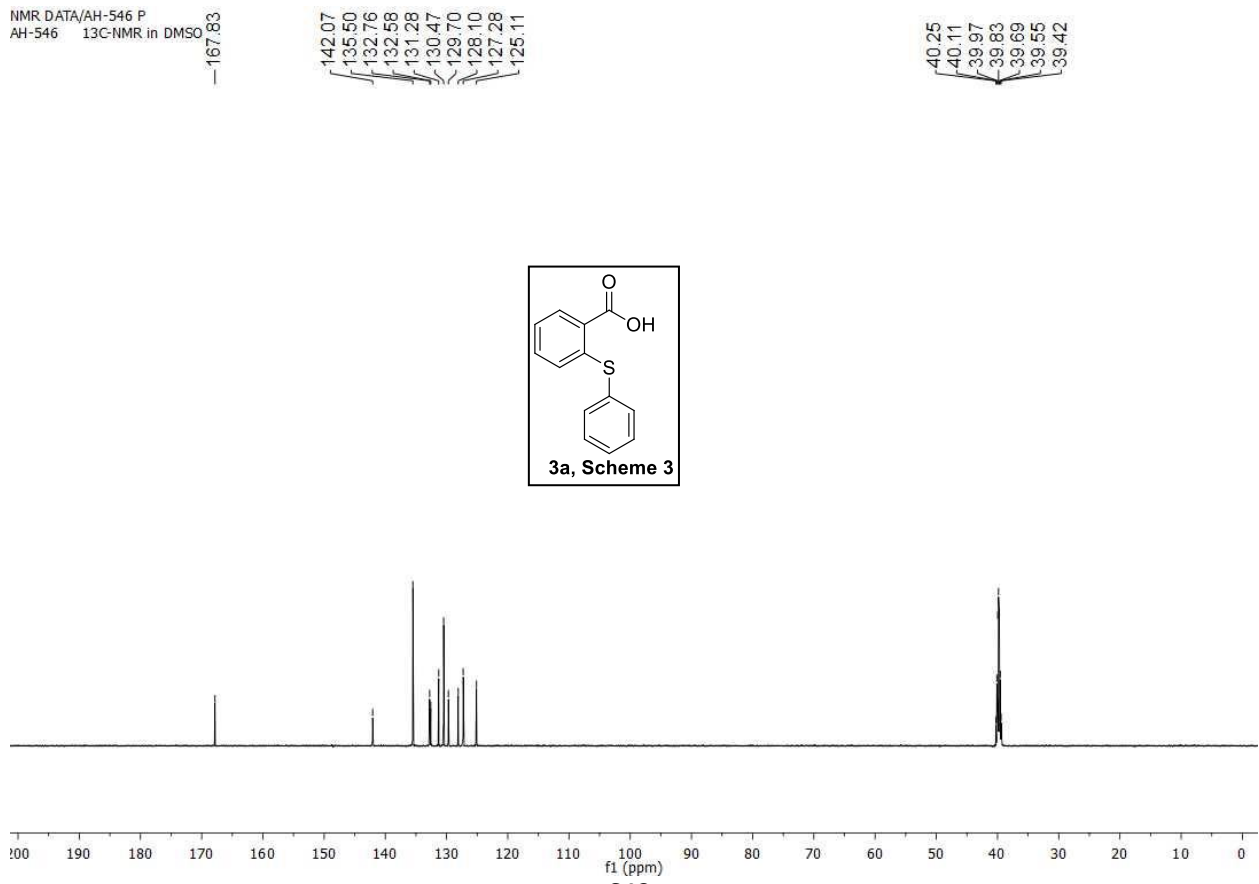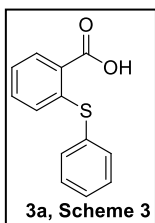

NMR DATA/AH-566 P  
AH-566 1H-NMR in DMSO

8.085  
8.024  
8.020  
8.010  
7.597  
7.591  
7.565  
7.557  
7.055  
7.052  
7.041  
7.038  
7.028  
7.024  
6.286  
6.282  
6.268  
6.265

-3.374

-2.501

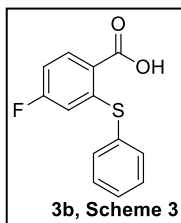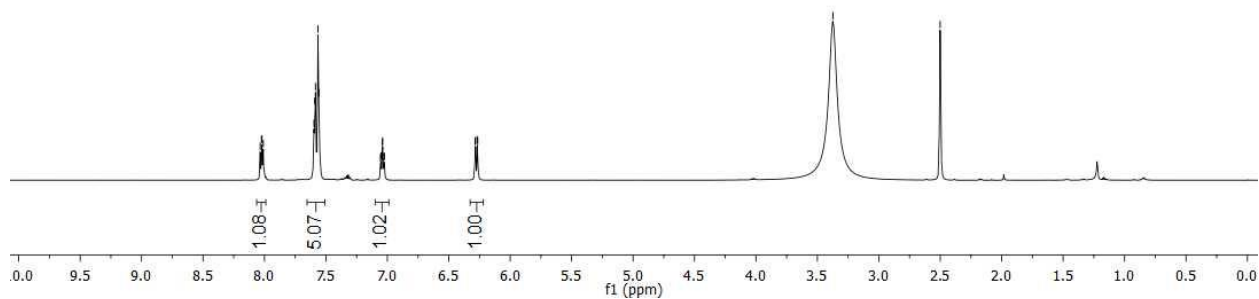

NMR DATA/AH-566 C  
AH-566 13C-NMR in DMSO

166.87  
165.41  
163.74  
146.80  
146.74  
136.12  
134.41  
134.35  
131.42  
130.83  
130.51  
123.70  
123.68  
113.06  
112.89  
112.17  
112.03

40.32  
40.18  
40.04  
39.60  
39.77  
39.63  
39.49

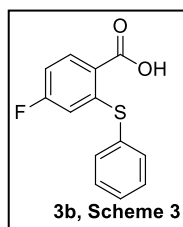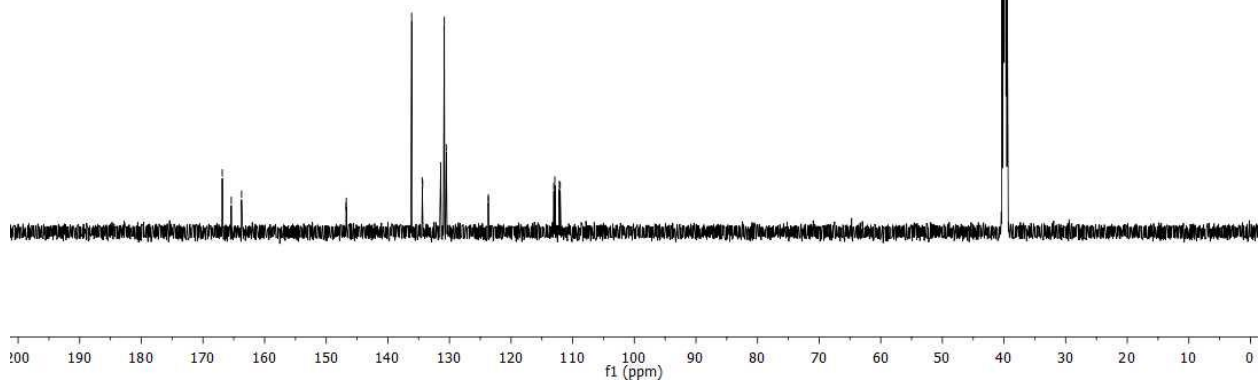

NMR DATA/AH-558 C  
AH-558 1H-NMR in DMSO  
7.92  
7.89  
7.81  
7.79  
7.73  
7.69  
7.519  
7.515  
7.391  
7.388  
7.377  
7.365  
7.363  
7.237  
7.225  
7.212  
6.766  
6.752

-3.420

-2.502

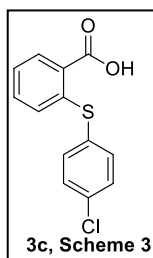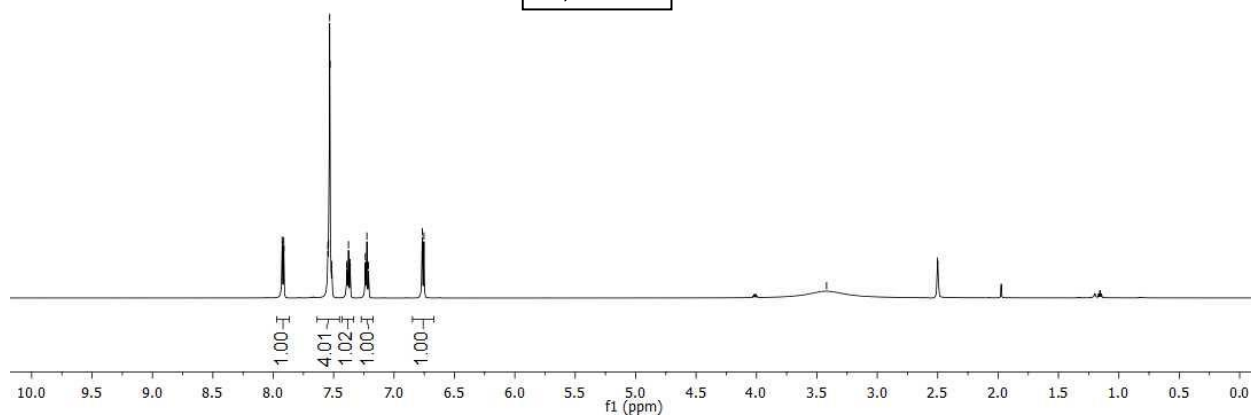

NMR DATA/AH-558 C  
AH-558 13C-NMR in DMSO  
-167.80

141.30  
137.05  
134.64  
132.96  
131.86  
131.31  
130.47  
128.36  
127.55  
125.45

40.31  
40.17  
40.03  
39.89  
39.75  
39.61  
39.47

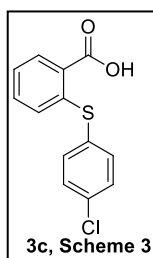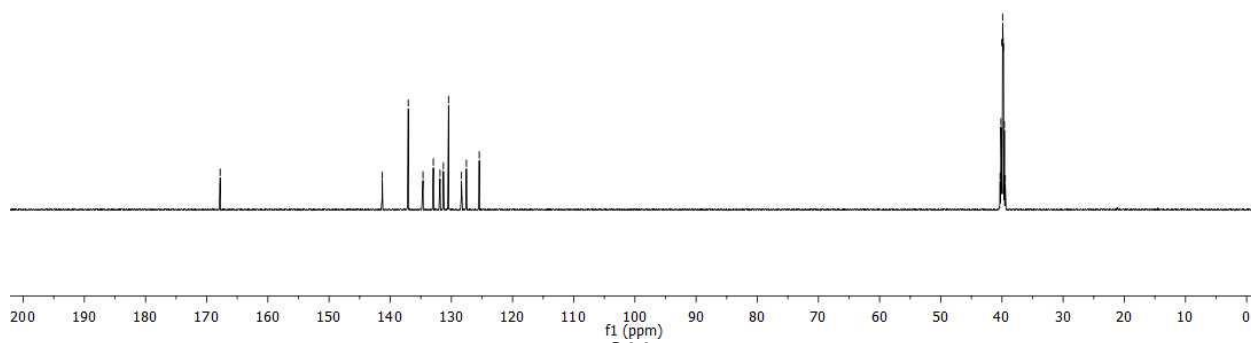

NMR DATA/AH-559 P  
AH-559 1H-NMR in DMSO

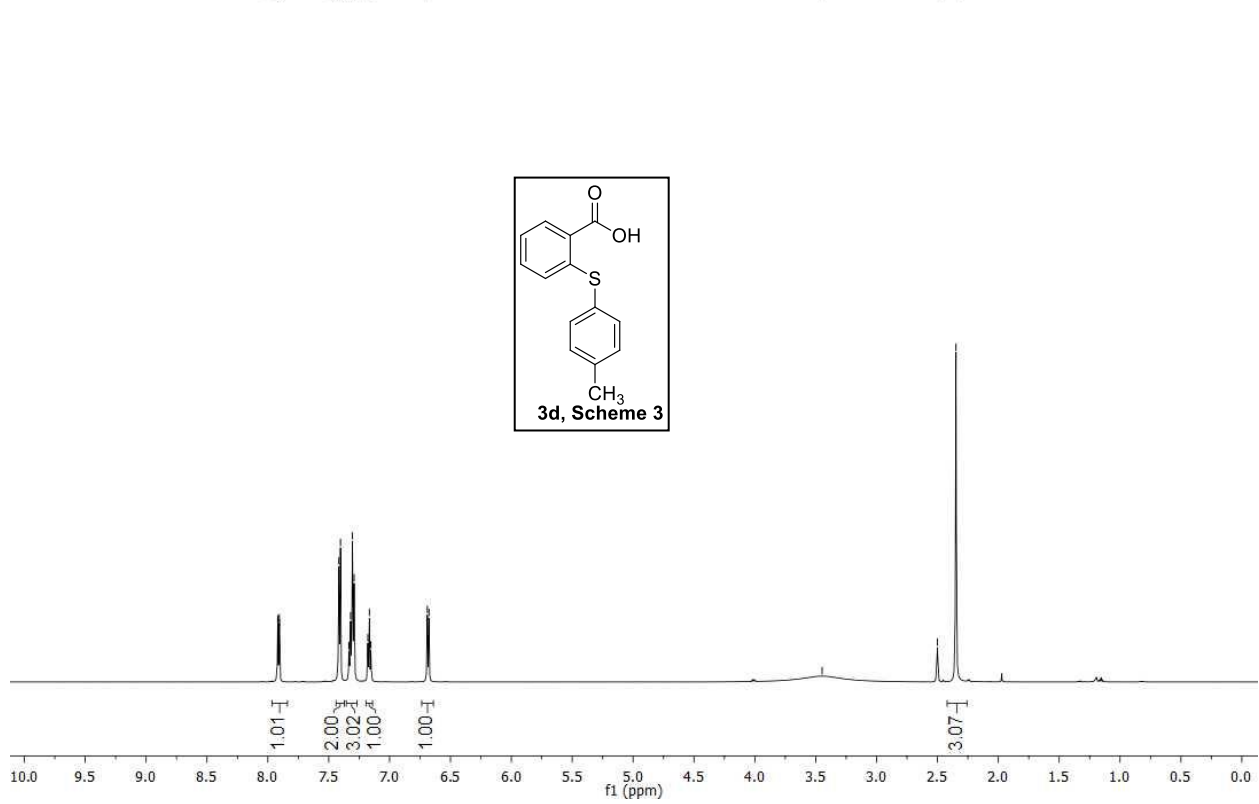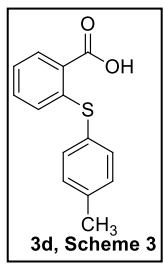

NMR DATA/AH-559 C  
AH-559 13C-NMR in DMSO

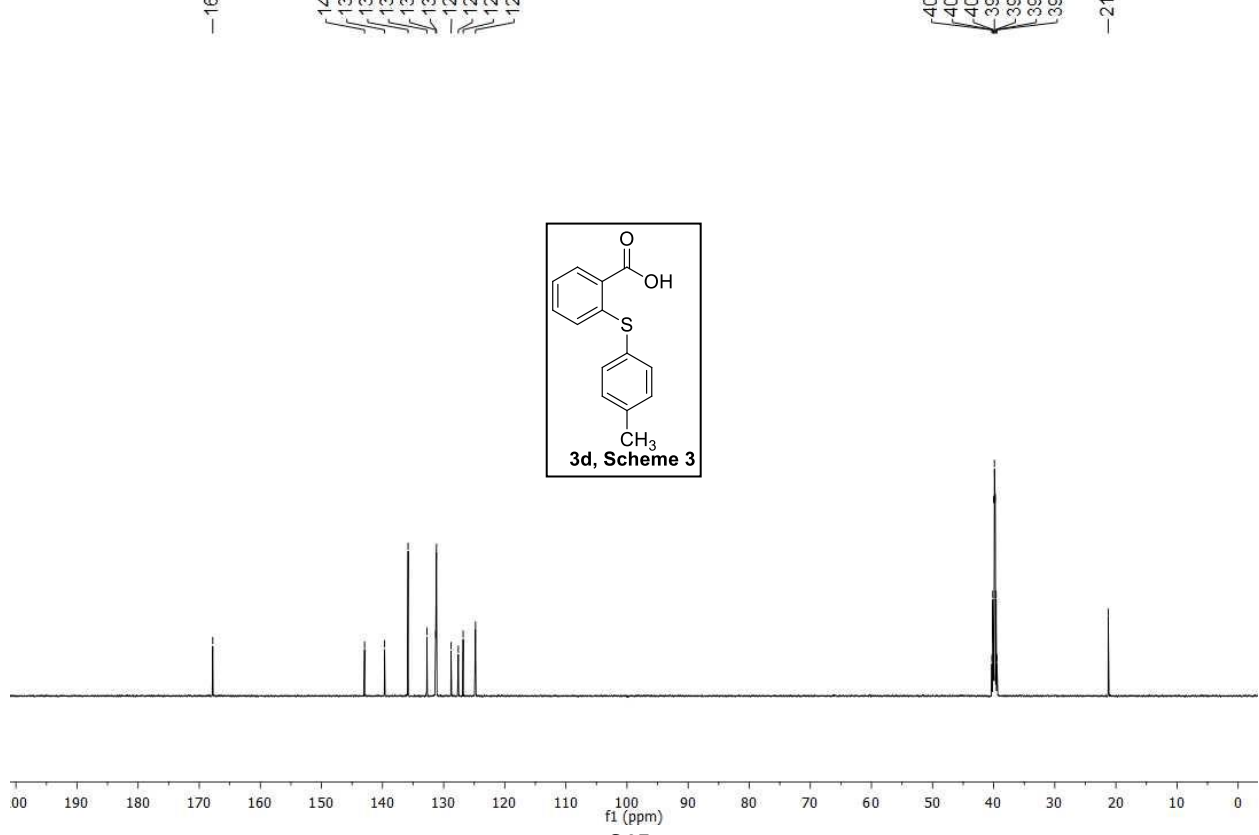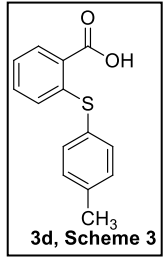

NMR DATA/AH-571 P  
AH-571 1H-NMR in DM

8.007  
8.003  
7.568  
7.564  
7.553  
7.549  
7.541  
7.537  
7.514  
7.508  
7.503  
6.646  
6.631

3.384

2.500

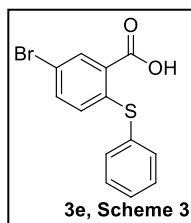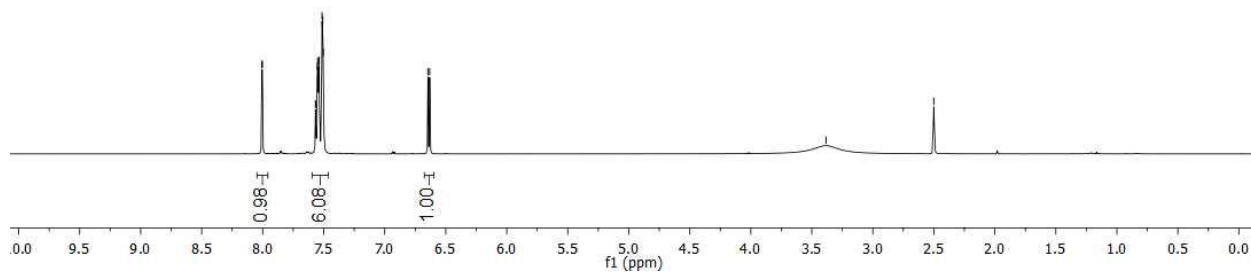

NMR DATA/AH-571 C  
AH-571 13C-NMR in DMSO

166.51

141.91

135.60

135.45

133.40

131.88

130.65

130.06

129.66

129.24

117.57

40.34

40.20

40.06

39.92

39.78

39.64

39.50

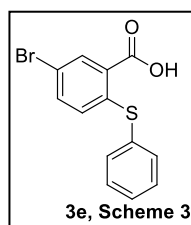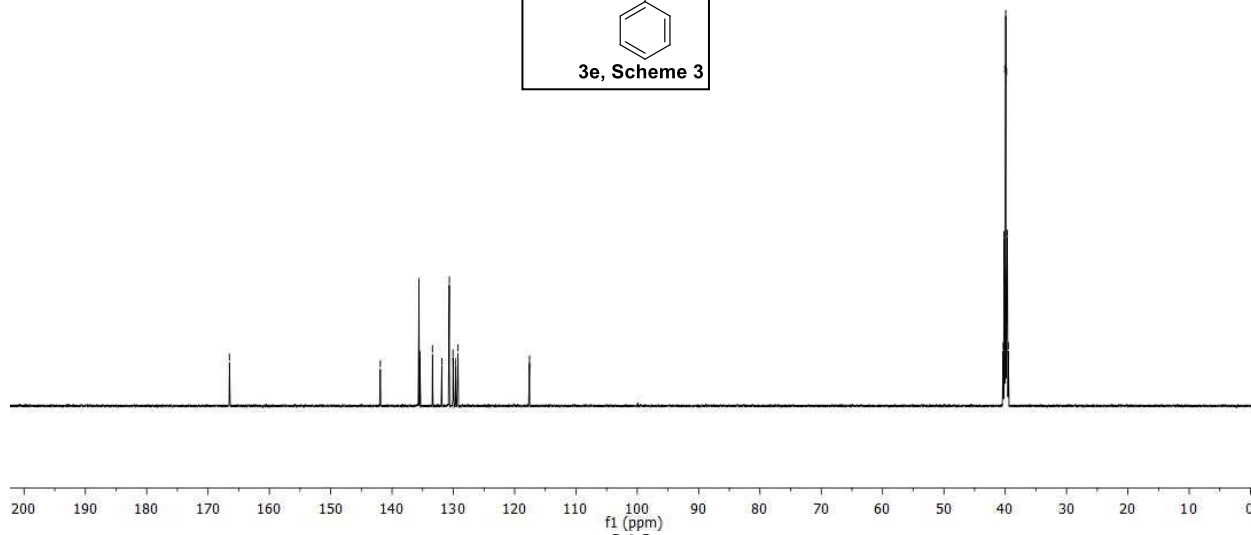

NMR DATA/AH-574 C  
 AH-574 1H-NMR in DMSO-d<sub>6</sub>

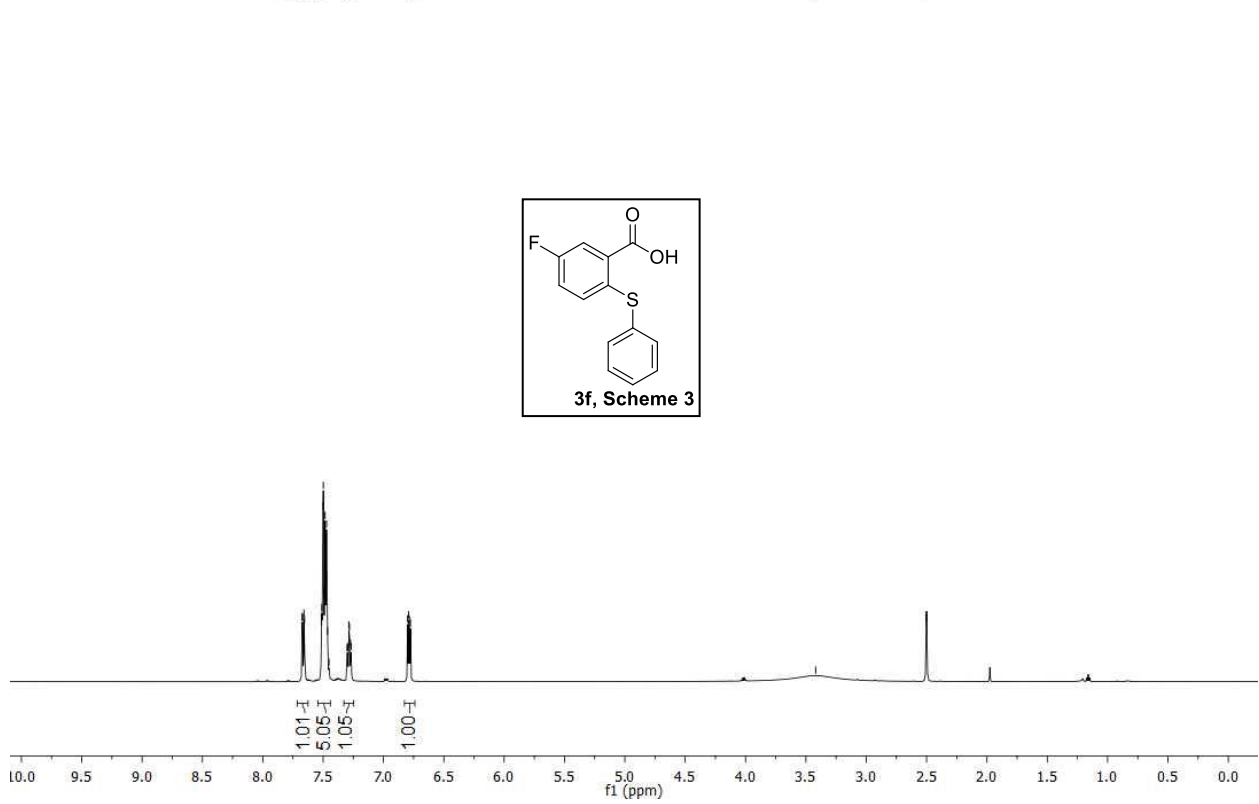

NMR DATA/AH-574 C  
 AH-574 13C-NMR in DMSO-d<sub>6</sub>

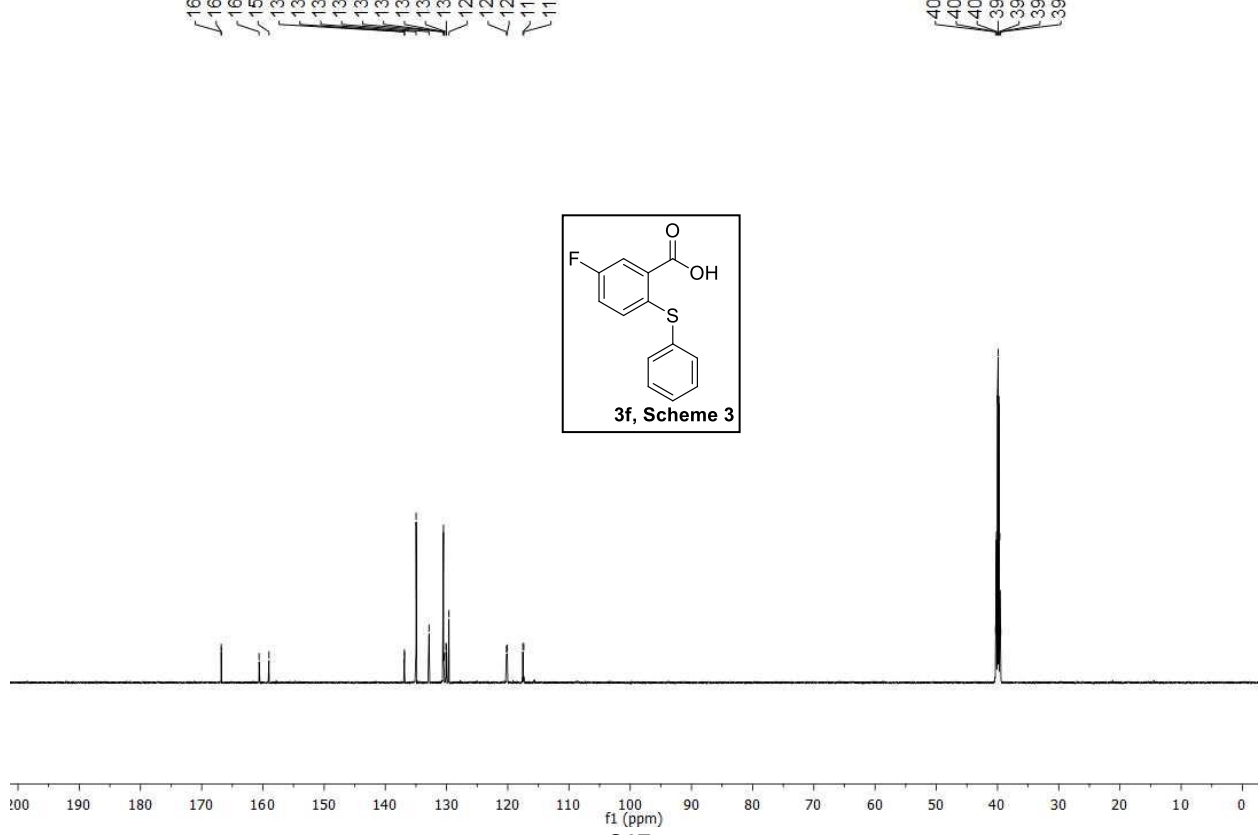

NMR DATA/AH-401 P  
AH-401 1H-NMR in CDCl<sub>3</sub>

10.833

8.111  
8.098  
7.576  
7.564  
7.550  
7.494  
7.480  
7.467  
7.360  
7.338  
7.325  
7.276  
7.243  
7.229  
7.073  
7.059  
7.011  
6.999  
6.986

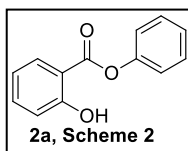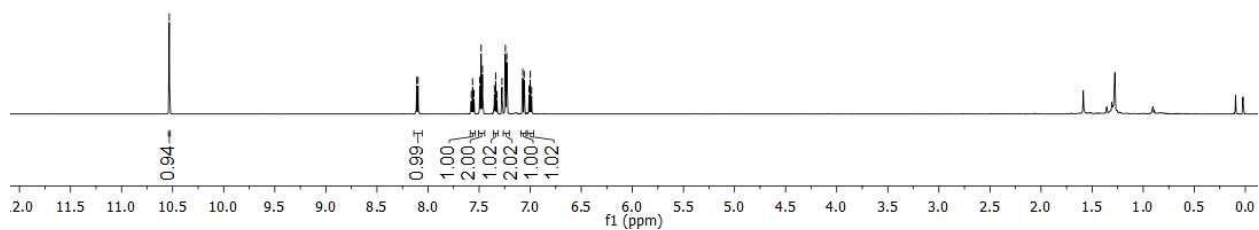

NMR DATA/AH-401 C  
AH-401 13C-NMR in CDCl<sub>3</sub>

168.93

162.17

150.06

136.46

130.33

129.62

126.38

121.62

119.45

117.81

111.81

77.21

77.00

76.78

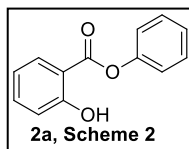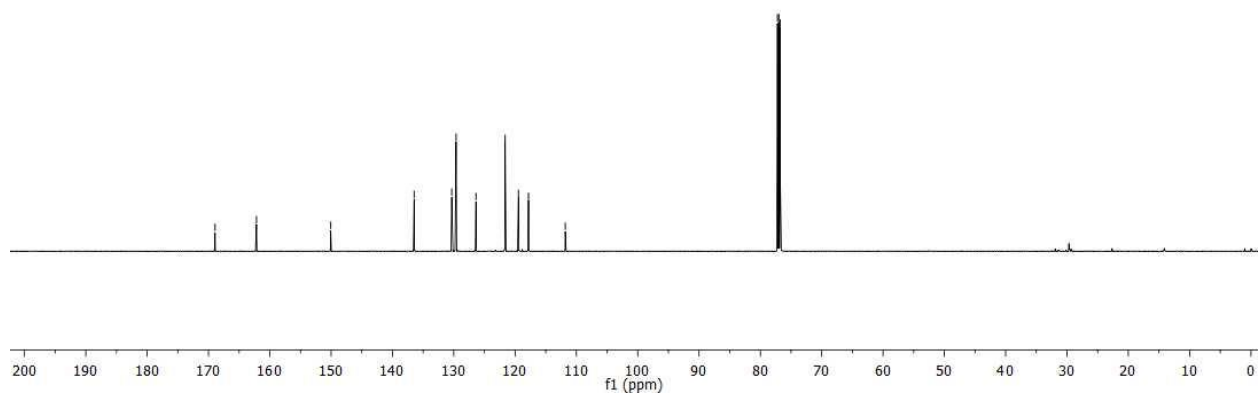



NMR DATA/AH-403 P  
AH-403 1H-NMR in CDCl<sub>3</sub>

10.417

8.084  
8.082  
8.071  
8.069  
7.581  
7.579  
7.567  
7.555  
7.553  
7.276  
7.213  
7.205  
7.202  
7.198  
7.190  
7.169  
7.156  
7.141  
7.071  
7.057  
6.995  
6.982

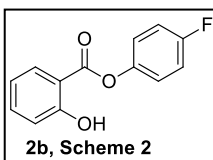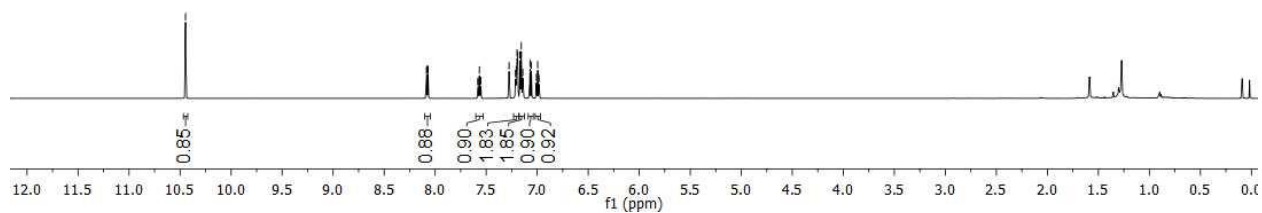

NMR DATA/AH-403 C  
AH-403 13C-NMR in CDCl<sub>3</sub>

168.87  
162.18  
161.34  
159.71  
145.83  
145.81  
136.61  
130.27  
123.10  
123.05  
119.50  
117.86  
116.40  
116.24  
111.57  
77.20  
76.99  
76.78

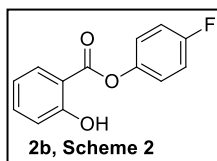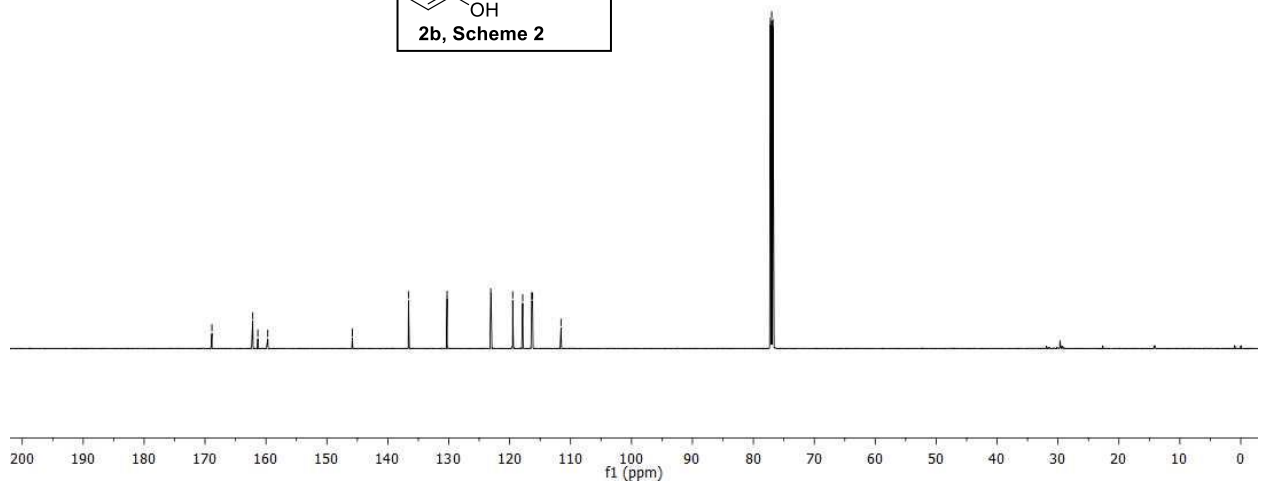

AH-398-1H/1

— 10.391

8.065  
8.060  
8.038  
8.034  
7.576  
7.572  
7.548  
7.524  
7.520  
7.432  
7.403  
7.255  
7.178  
7.148  
7.058  
7.030  
7.000  
6.974  
6.949

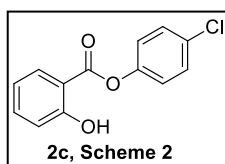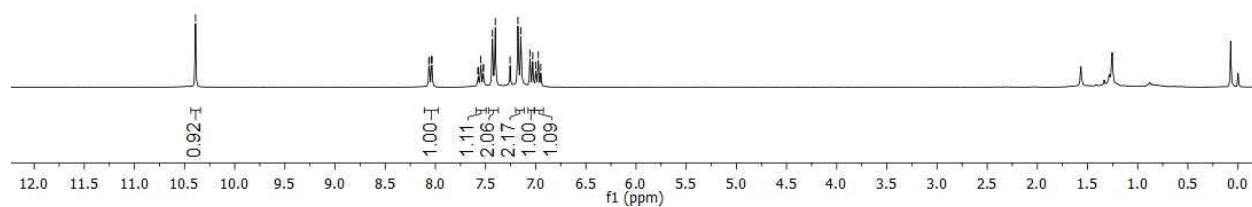

AH-398-C1.fid

168.636  
162.214  
148.503  
136.694  
131.836  
130.289  
129.689  
123.037  
119.545  
117.898  
111.503  
77.437  
77.013  
76.589

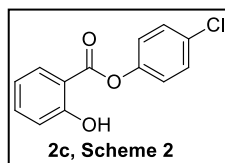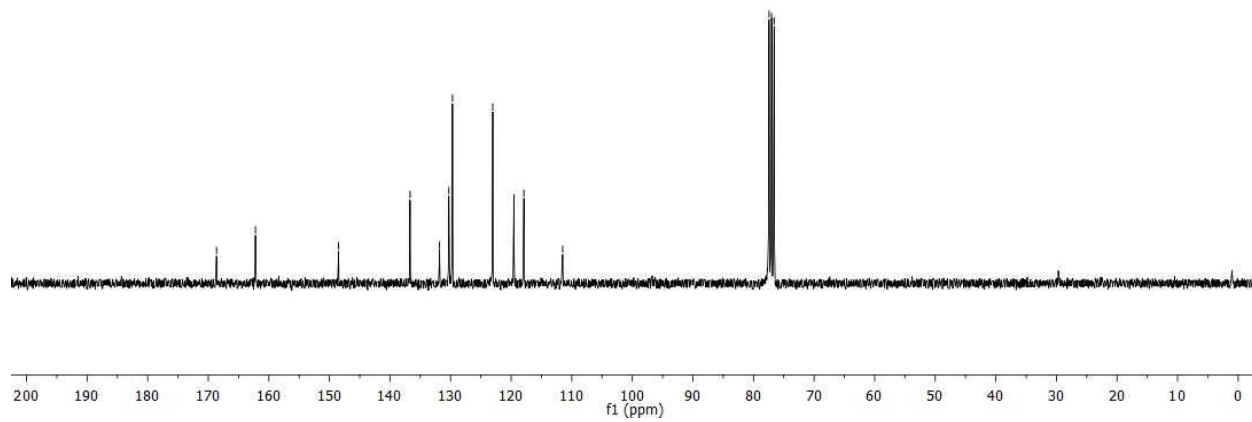

S50

NMR DATA/AH-406 P  
AH-406 1H-NMR in CDCl<sub>3</sub>

8.074  
8.072  
8.060  
8.059  
7.595  
7.580  
7.568  
7.556  
7.554  
7.276  
7.137  
7.122  
7.070  
7.056  
6.994  
6.981

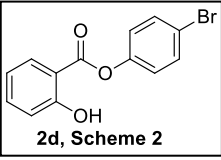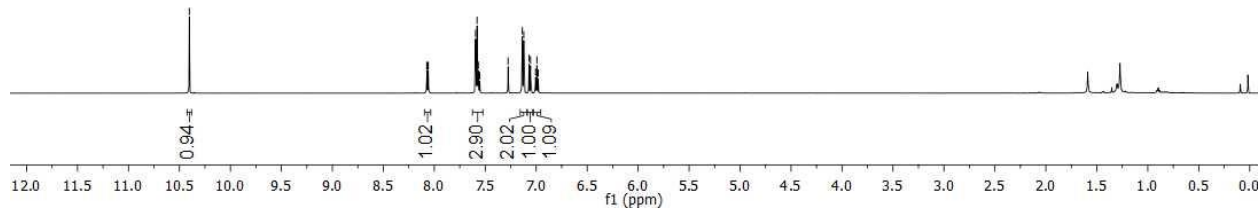

NMR DATA/AH-406 C  
AH-406 13C-NMR in CDCl<sub>3</sub>

168.54  
162.21  
149.06  
136.69  
132.67  
130.28  
123.44  
119.54  
117.89  
111.48  
77.21  
76.99  
76.78

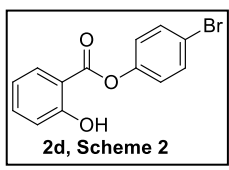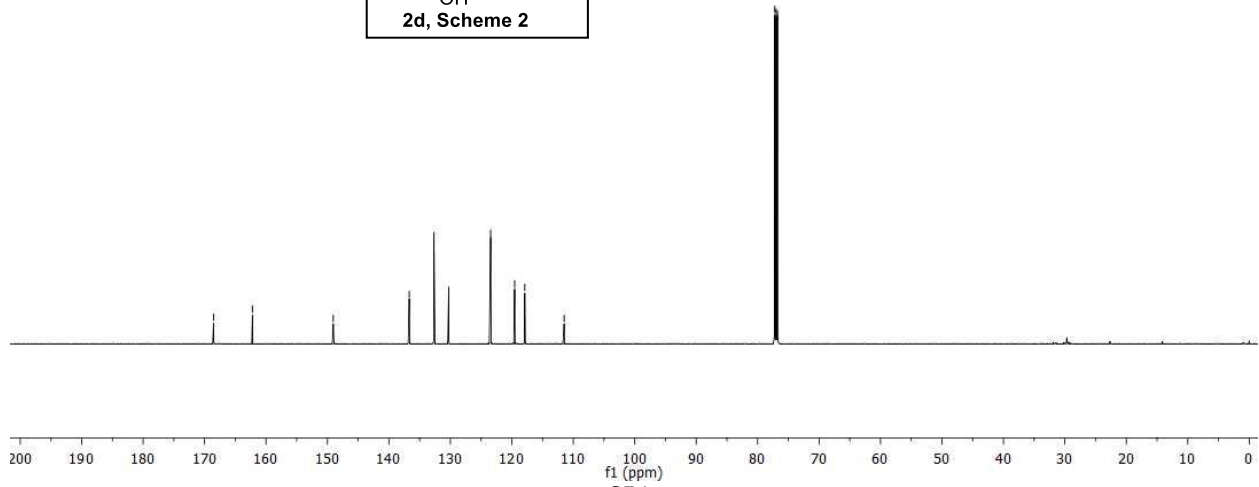

NMR DATA/AH-371 P  
AH-371 1H-NMR in CDCl<sub>3</sub>

8.096  
8.093  
8.083  
8.080  
7.567  
7.565  
7.553  
7.541  
7.539  
7.276  
7.161  
7.155  
7.152  
7.144  
7.140  
7.134  
7.064  
7.063  
7.050  
7.049  
7.001  
6.999  
6.992  
6.987  
6.983  
6.975  
6.971  
6.965  
3.851

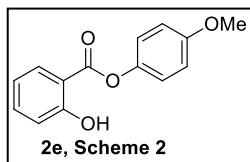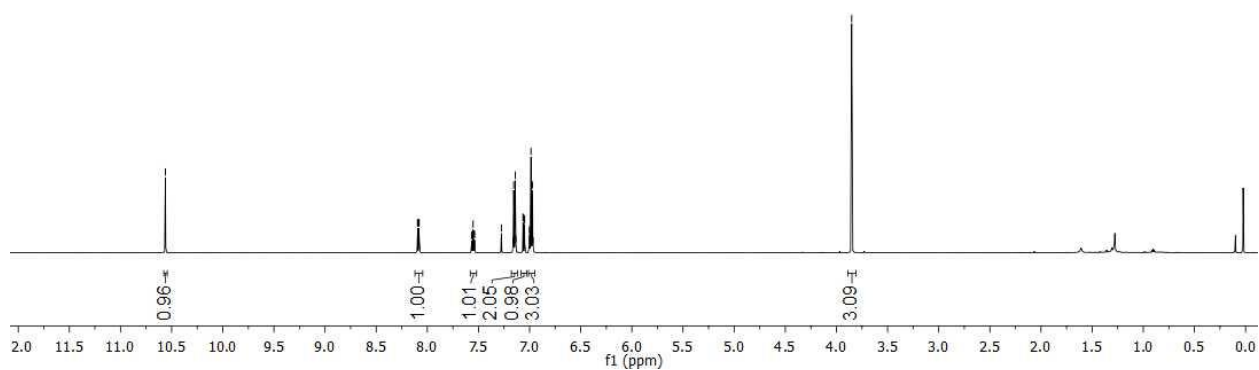

NMR DATA/AH-371 C  
AH-371 13C-NMR in CDCl<sub>3</sub>

169.27  
162.11  
157.63  
143.45  
136.38  
130.30  
122.37  
119.41  
117.78  
114.61  
111.86  
77.22  
77.01  
76.79  
55.62

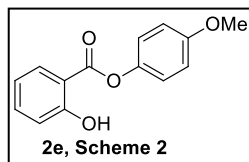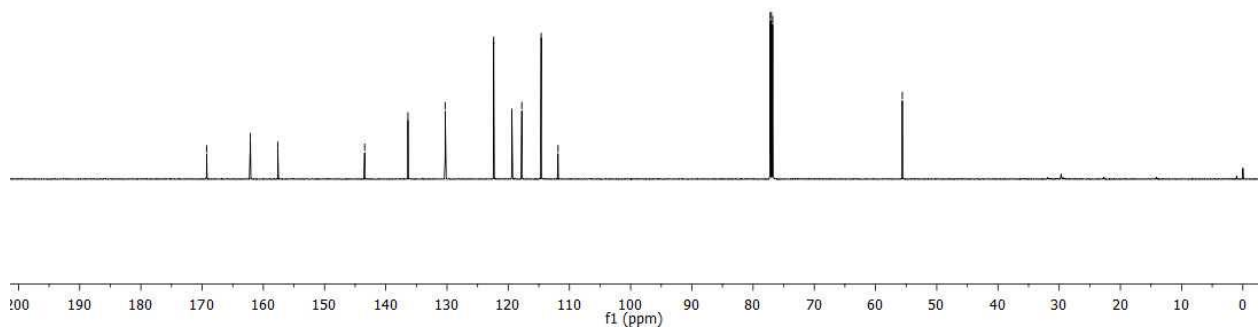

NMR DATA/AH-387 P  
 AH-387 1H-NMR in CDCl<sub>3</sub>  
 10.510

8.097  
 8.094  
 8.084  
 8.081  
 7.572  
 7.570  
 7.558  
 7.546  
 7.544  
 7.476  
 7.464  
 7.440  
 7.428  
 7.415  
 7.381  
 7.369  
 7.356  
 7.276  
 7.164  
 7.160  
 7.156  
 7.148  
 7.144  
 7.139  
 7.069  
 7.065  
 7.061  
 7.054  
 7.050  
 7.005  
 6.992  
 6.980  
 5.107

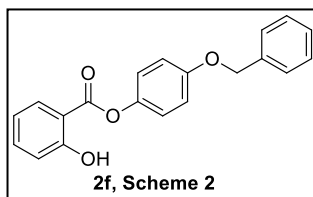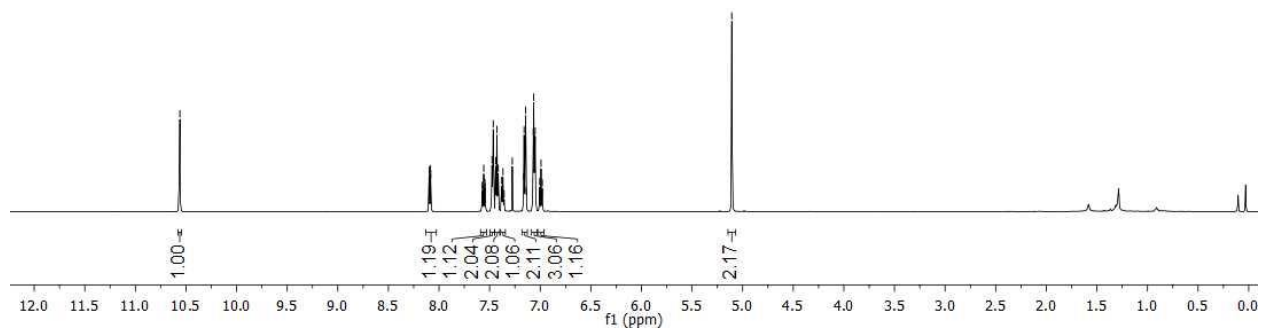

NMR DATA/AH-387 C  
 AH-387 13C-NMR in CDCl<sub>3</sub>  
 169.23  
 162.13  
 156.85

143.64  
 136.66  
 136.40  
 130.31  
 128.63  
 128.08  
 127.46  
 122.42  
 119.42  
 117.79  
 115.60  
 111.86  
 77.22  
 77.01  
 76.80  
 70.44

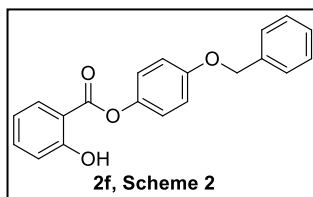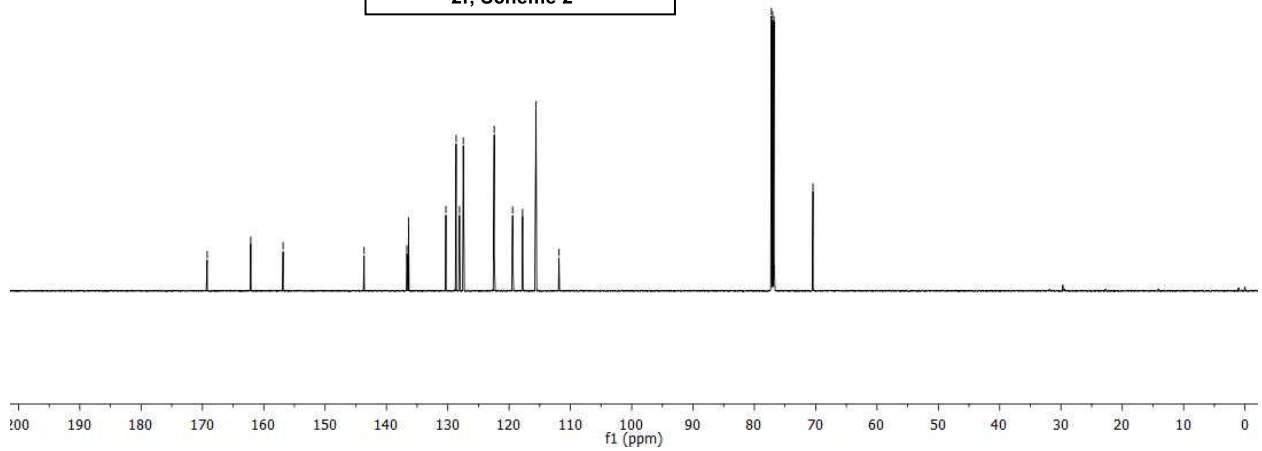

NMR DATA/AH-394 P  
AH-394 1H-NMR in CDCl<sub>3</sub>

10.517

8.099  
8.086  
7.566  
7.552  
7.540  
7.275  
7.271  
7.257  
7.113  
7.099  
7.062  
7.048  
7.000  
6.987  
6.975

2.405

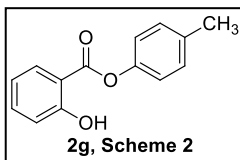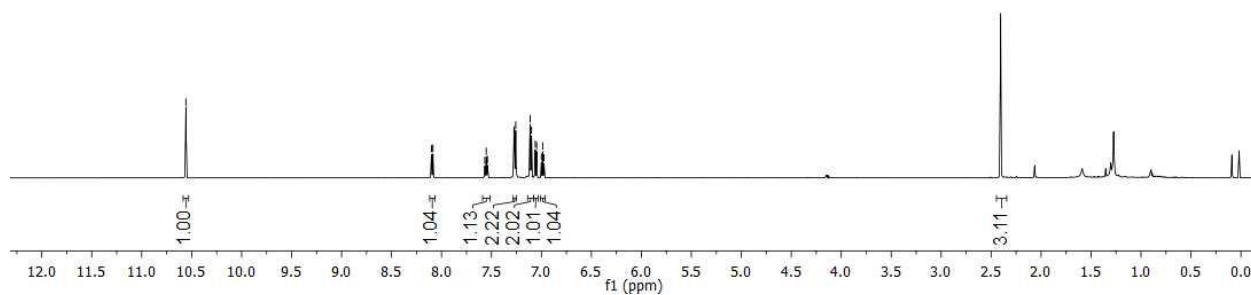

NMR DATA/AH-394 C  
AH-394 13C-NMR in CDCl<sub>3</sub>

169.13

162.12

147.80

136.37

136.10

130.32

130.12

121.26

119.40

117.77

111.89

77.20

76.99

76.78

20.90

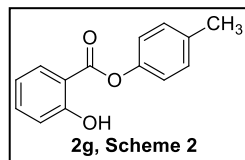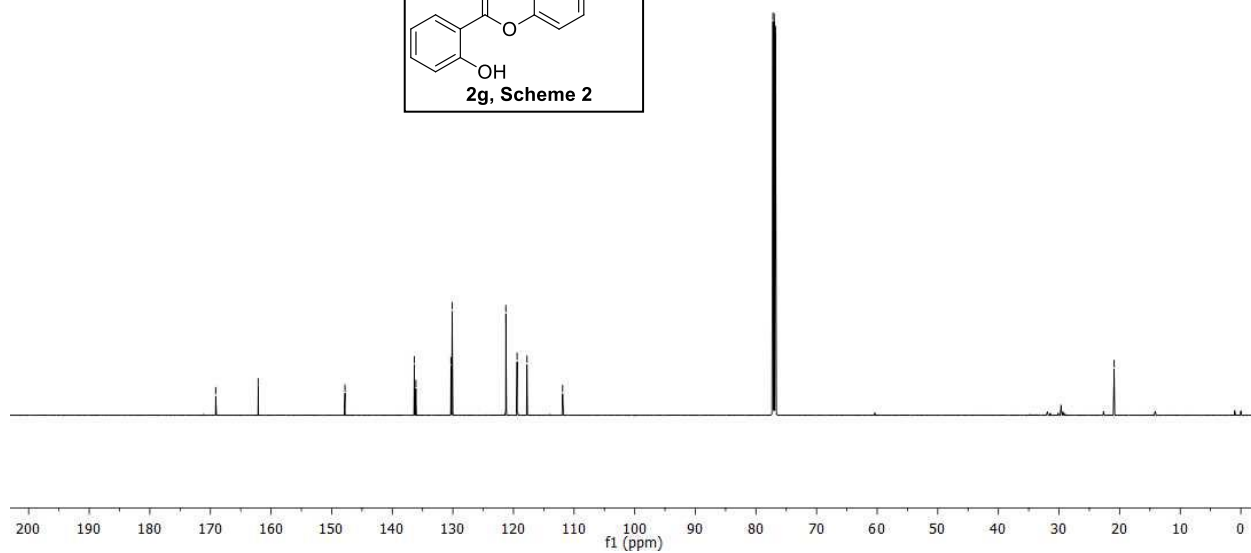

NMR DATA/AH-413 P  
AH413 1H-NMR in CDCl3

-10.832

8.132  
8.119  
7.690  
7.677  
7.623  
7.610  
7.589  
7.576  
7.564  
7.492  
7.480  
7.467  
7.405  
7.393  
7.381  
7.318  
7.304  
7.276  
7.084  
7.070  
7.025  
7.013  
7.000

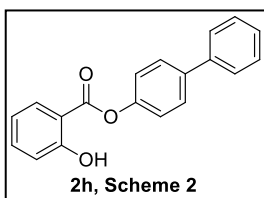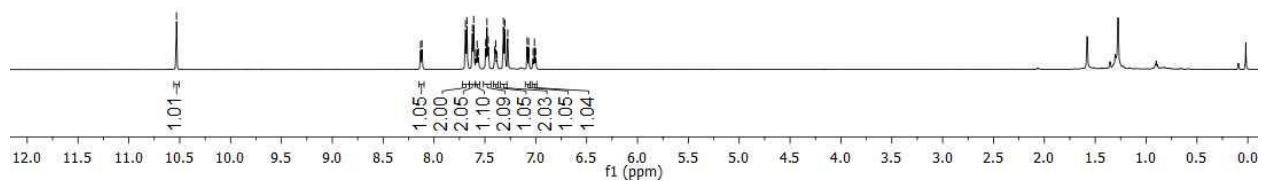

NMR DATA/AH-413 C  
AH-413 13C-NMR in CDCl3

-168.98  
-162.20  
-149.44  
-140.15  
-139.58  
-136.54  
-130.35  
-128.83  
-128.34  
-127.49  
-127.14  
-121.90  
-119.49  
-117.85  
-111.77  
77.20  
76.99  
76.78

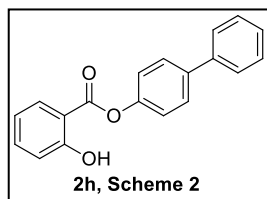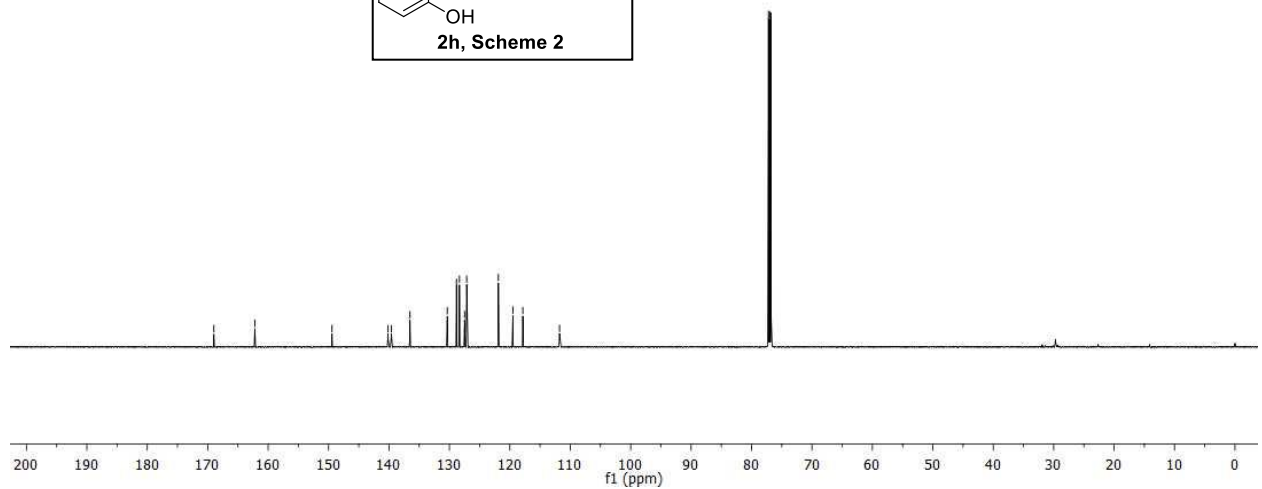

NMR DATA/AH-386 P  
AH-386 1H-NMR in CDCl<sub>3</sub>

10.890  
8.173  
8.162  
8.159  
7.958  
7.943  
7.920  
7.907  
7.876  
7.863  
7.711  
7.707  
7.599  
7.596  
7.584  
7.572  
7.569  
7.567  
7.557  
7.555  
7.545  
7.542  
7.531  
7.529  
7.520  
7.518  
7.381  
7.377  
7.366  
7.362  
7.276  
7.095  
7.081  
7.038  
7.025  
7.012

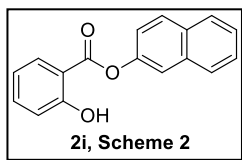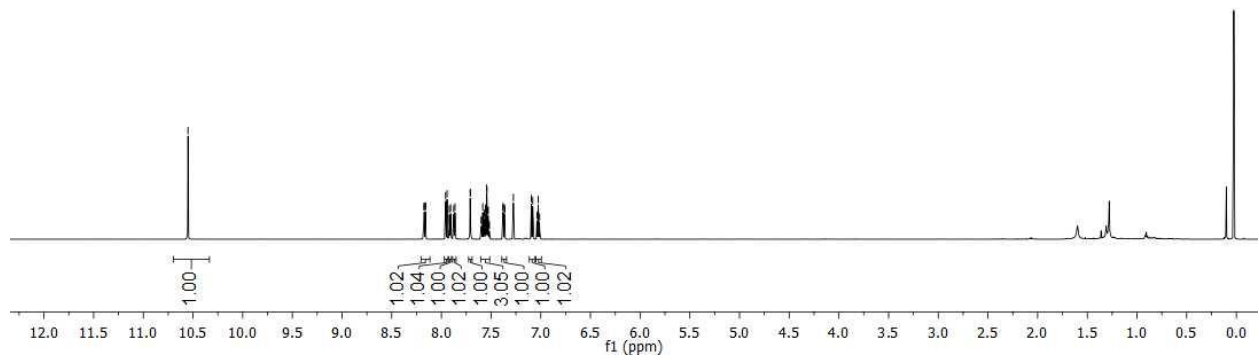

NMR DATA/AH-386 C  
AH-386 13C-NMR in CDCl<sub>3</sub>

169.09  
162.21  
147.69  
136.53  
133.70  
131.66  
130.39  
129.65  
127.84  
127.69  
126.79  
126.03  
120.89  
119.50  
118.77  
117.86  
111.83  
77.21  
77.00  
76.79

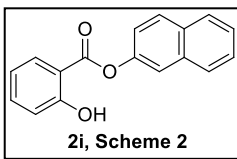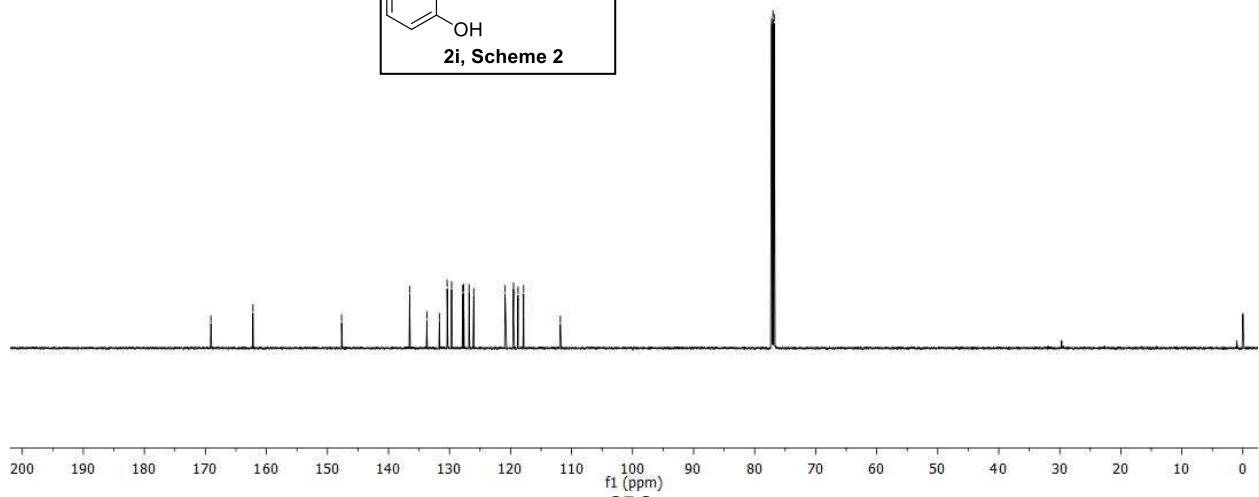



NMR DATA/AH-526 P

10.523  
8.327  
8.324  
8.314  
8.311  
7.964  
7.961  
7.952  
7.949  
7.948  
7.943  
7.930  
7.928  
7.868  
7.854  
7.645  
7.642  
7.633  
7.631  
7.628  
7.619  
7.616  
7.592  
7.589  
7.581  
7.578  
7.569  
7.565  
7.555  
7.553  
7.544  
7.541  
7.408  
7.406  
7.395  
7.394  
7.288  
7.131  
7.130  
7.117  
7.116  
7.098  
7.096  
7.086  
7.084  
7.072  
7.070

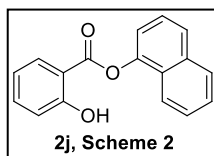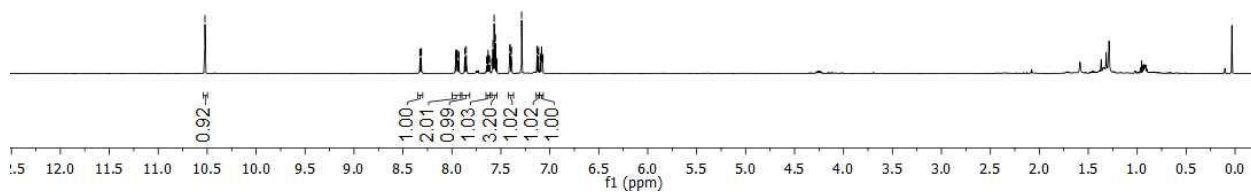

NMR DATA/AH-526 C

169.00  
162.33  
145.97  
136.66  
134.70  
130.36  
128.13  
126.78  
126.72  
126.67  
126.58  
125.36  
120.98  
119.63  
118.24  
117.98  
111.66  
77.20  
76.98  
76.77

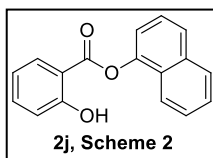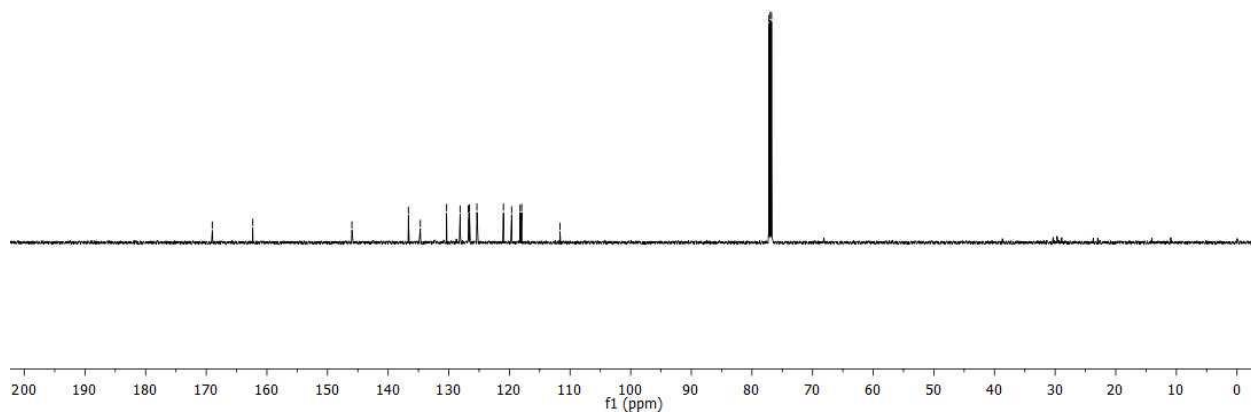

NMR DATA/AH-395 P  
AH-395 1H-NMR in CDCl<sub>3</sub>

10.538

8.140  
8.137  
8.127  
8.124  
7.586  
7.583  
7.571  
7.559  
7.557  
7.330  
7.318  
7.311  
7.300  
7.287  
7.276  
7.258  
7.256  
7.245  
7.244  
7.233  
7.231  
7.160  
7.147  
7.081  
7.080  
7.067  
7.066  
7.020  
7.019  
7.007  
6.995  
6.993  
2.264

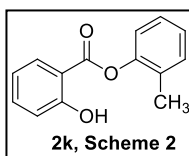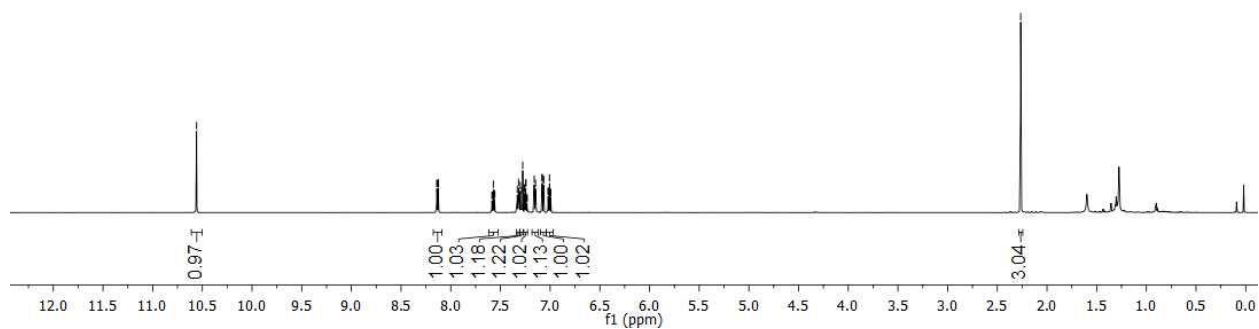

NMR DATA/AH-395 C  
AH-395 13C-NMR in CDCl<sub>3</sub>

168.66  
162.19  
148.69  
136.45  
131.32  
130.29  
130.26  
127.08  
126.53  
121.84  
119.48  
117.84  
117.71  
77.20  
76.99  
76.78  
16.16

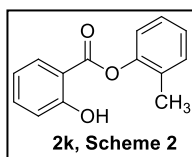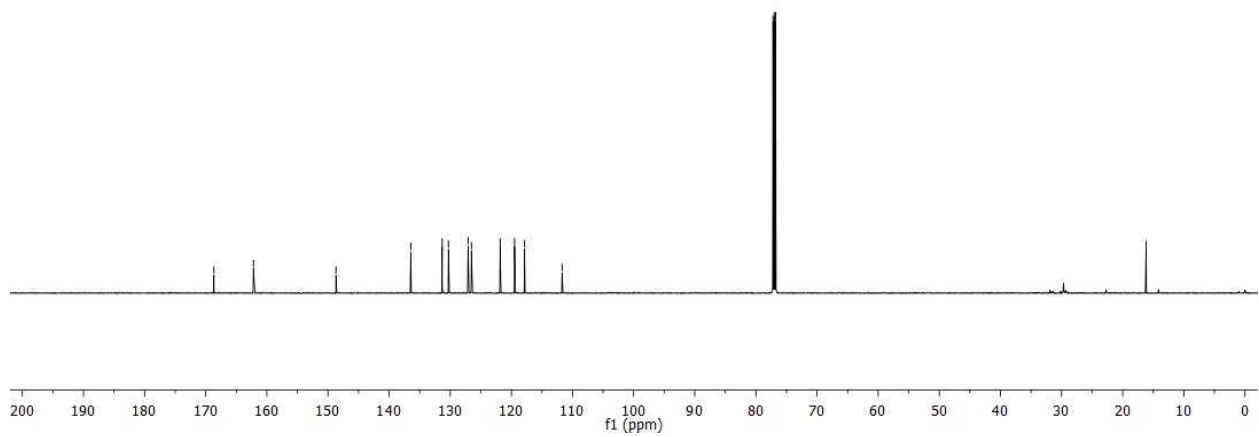

NMR DATA/AH-402 P  
AH-402 1H-NMR in CDCl<sub>3</sub>

8.139  
8.137  
8.126  
8.123  
7.568  
7.566  
7.554  
7.542  
7.540  
7.314  
7.311  
7.300  
7.299  
7.288  
7.285  
7.276  
7.190  
7.188  
7.177  
7.175  
7.064  
7.060  
7.034  
7.021  
7.019  
6.993  
6.981  
3.850

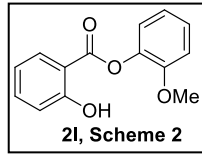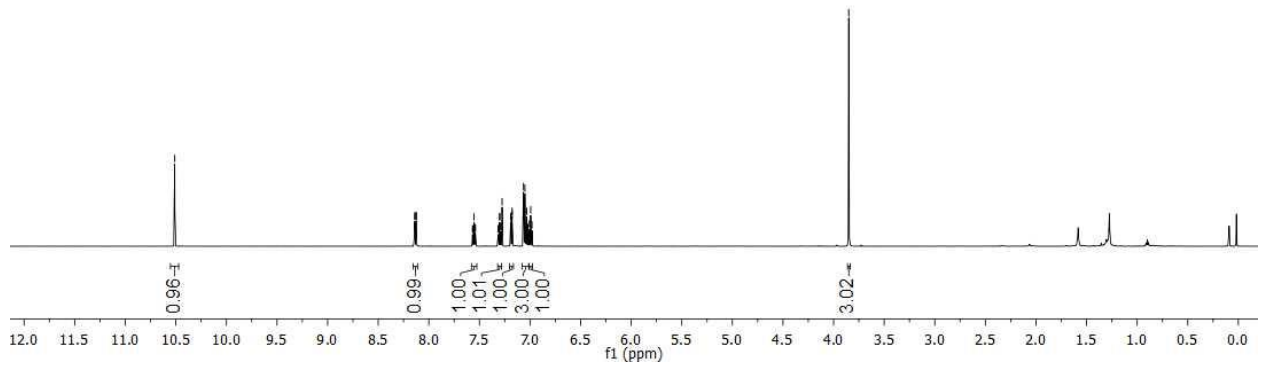

NMR DATA/AH-402 C  
AH-402 13C-NMR in CDCl<sub>3</sub>

168.41  
162.00  
151.13  
139.03  
136.28  
130.60  
127.40  
122.78  
120.84  
119.41  
117.67  
112.54  
111.82  
77.20  
76.99  
76.78  
55.89

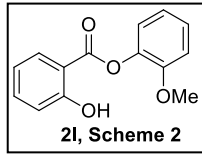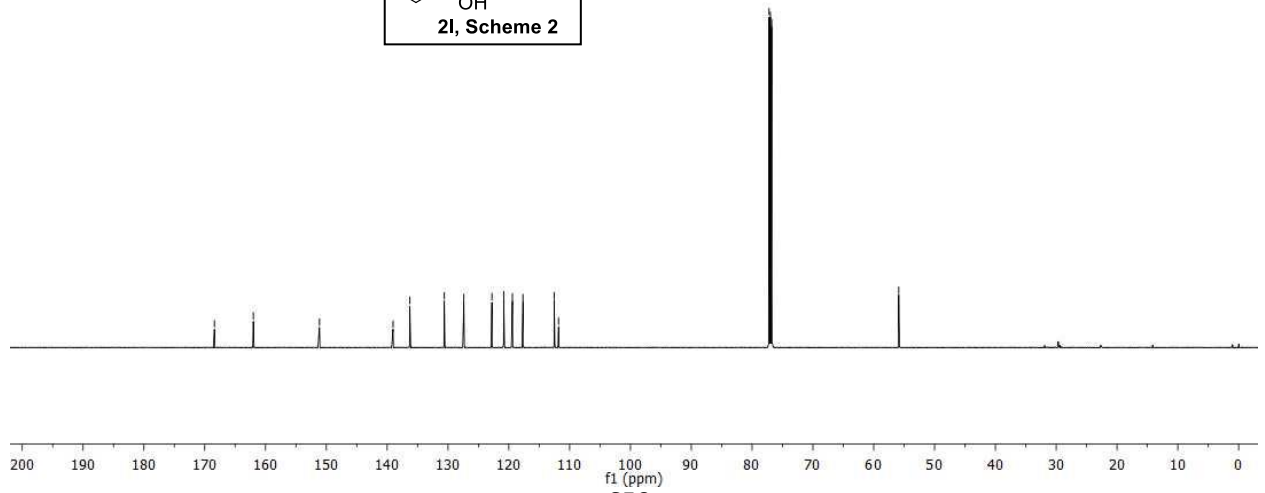

NMR DATA/AH-403 P  
AH-403 1H-NMR in CDCl<sub>3</sub>

10.417

8.084  
8.082  
8.071  
8.069  
7.581  
7.579  
7.567  
7.555  
7.553  
7.276  
7.213  
7.205  
7.202  
7.198  
7.190  
7.169  
7.156  
7.141  
7.071  
7.057  
6.995  
6.982

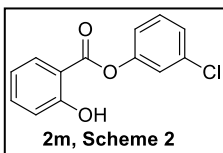

NMR DATA/AH-403 C  
AH-403 13C-NMR in CDCl<sub>3</sub>

168.87  
162.18  
161.34  
159.71

145.83  
145.81

136.61

130.27  
123.10  
123.05  
119.50  
117.86  
116.40  
116.24  
111.57

77.20  
76.99  
76.78

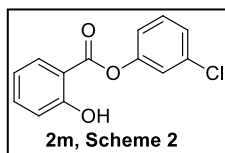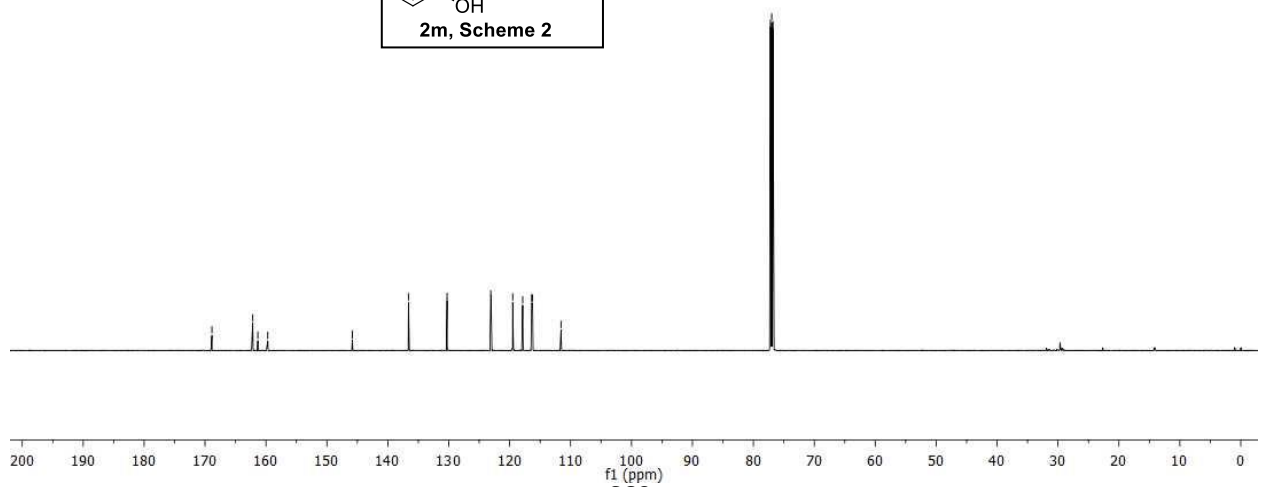

AH-400-1H/1

-10.527

8.108  
8.103  
8.081  
8.076  
7.594  
7.588  
7.565  
7.542  
7.536  
7.401  
7.374  
7.347  
7.280  
7.078  
7.053  
7.051  
7.024  
7.021  
6.997  
6.973  
6.970  
6.904  
6.896  
6.876  
6.870  
6.868  
6.850  
6.846  
6.823  
6.819  
6.797  
6.790  
6.783  
3.853

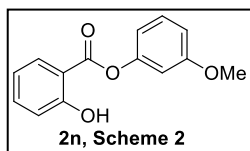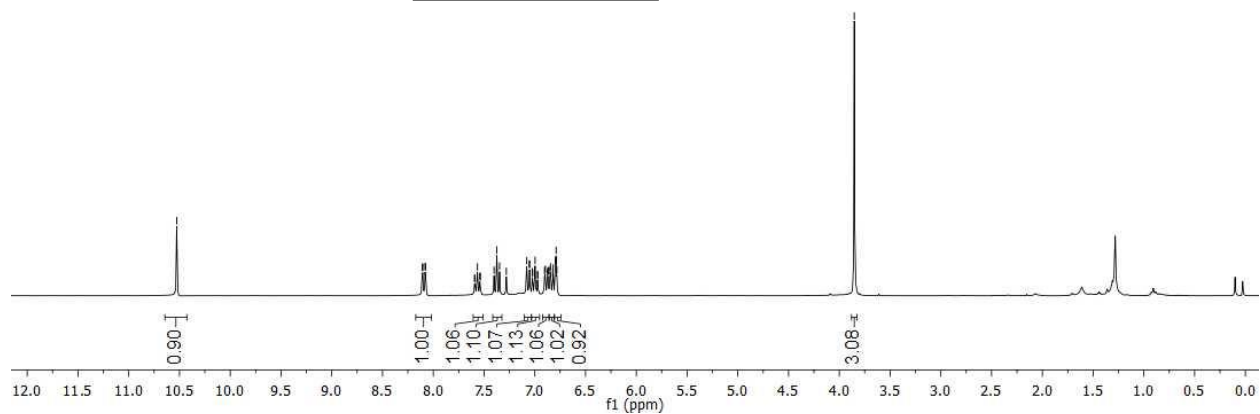

AH-400-C/1

168.853  
162.177  
160.624

150.997

136.480  
130.332  
130.010

119.458  
117.819  
113.772  
112.202  
111.800  
107.666

77.432  
77.007  
76.584

55.478

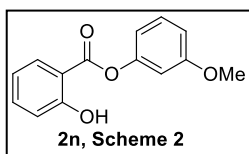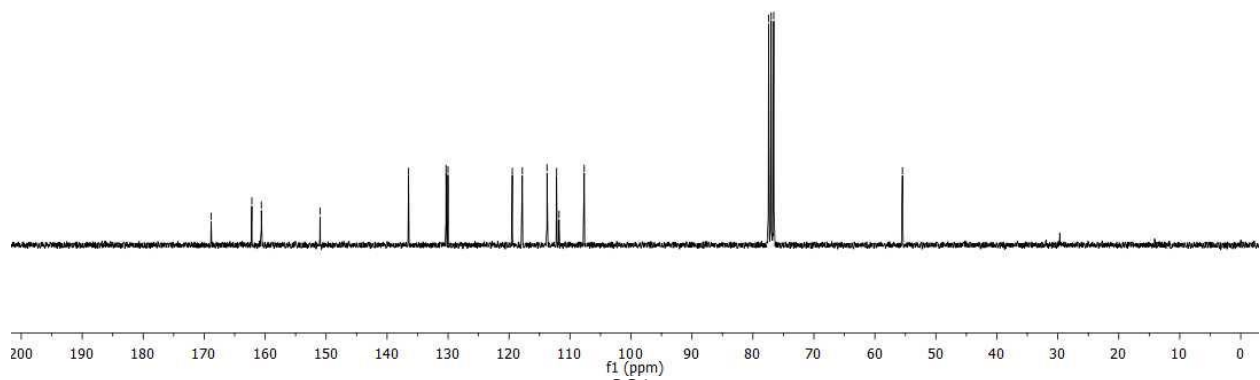

NMR DATA/AH-412 F  
AH412 1H-NMR in CD

10.7135  
10.6013  
8.125  
8.114  
8.110  
8.099  
7.491  
7.477  
7.464  
7.352  
7.339  
7.327  
7.276  
7.229  
7.216  
6.763  
6.759  
6.746  
6.742  
6.734  
6.730  
6.720  
6.716  
6.706

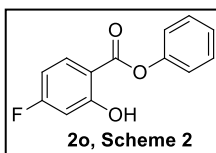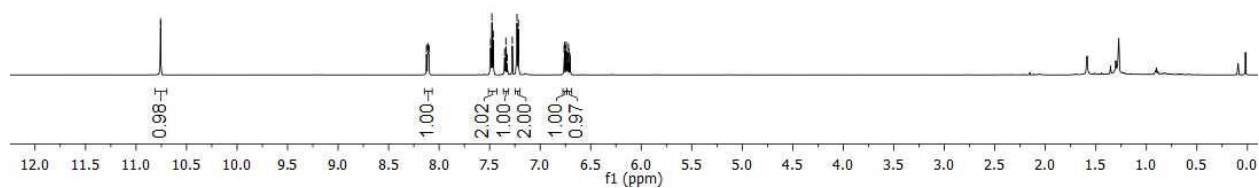

NMR DATA/AH-412 C  
AH412 13C-NMR in CD

168.86  
168.31  
166.86  
164.36  
164.27  
149.90  
132.64  
132.56  
129.65  
126.47  
121.56  
108.57  
108.55  
107.86  
107.71  
104.72  
104.56  
77.20  
76.99  
76.78

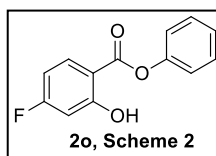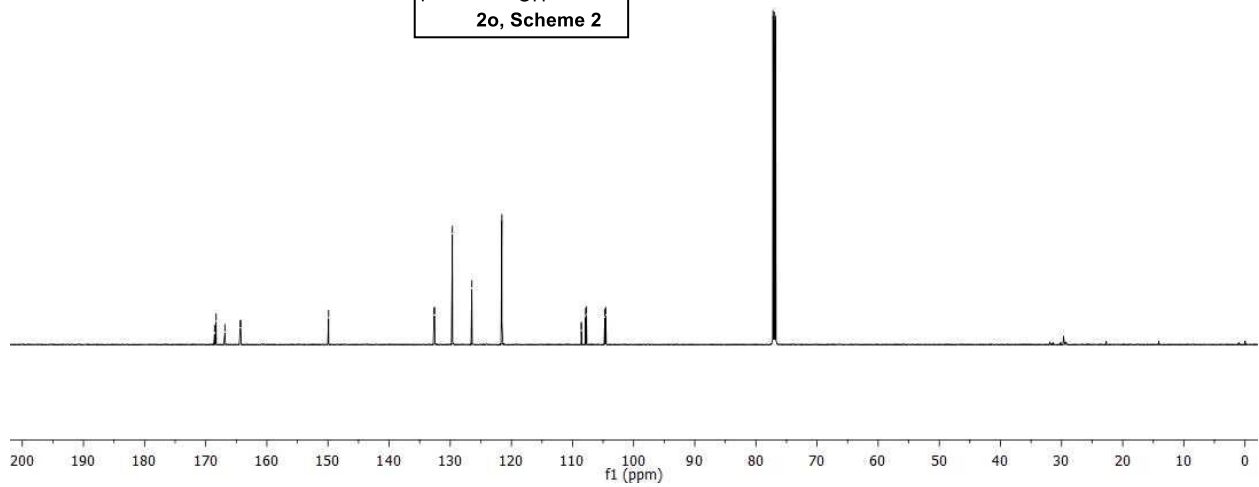

NMR DATA/AH-419 B  
AH-419 1H-NMR in CDCl<sub>3</sub>

10.731  
10.715

8.114  
8.103  
8.089  
8.088  
7.276  
7.270  
7.256  
7.102  
7.088  
6.755  
6.751  
6.738  
6.733  
6.724  
6.720  
6.710  
6.696  
6.692

2.404

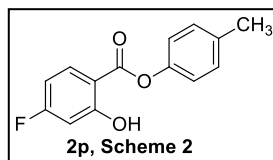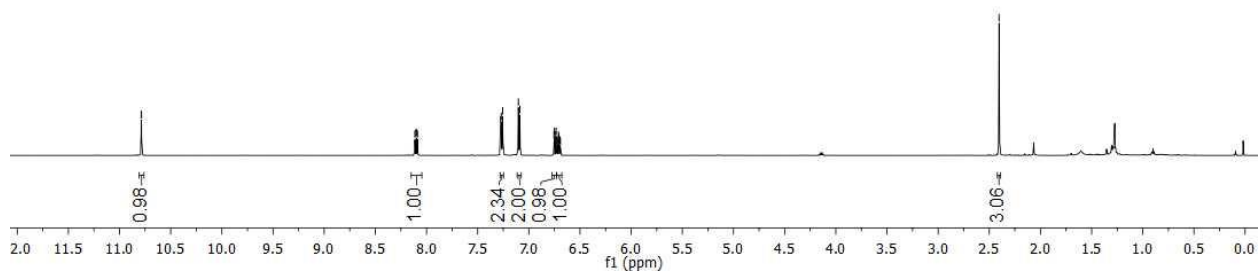

NMR DATA/AH-419 C  
AH-419 13C-NMR in CDCl<sub>3</sub>

168.50  
166.81  
164.31  
164.21

147.65

136.22  
132.62  
132.54  
130.14

121.20

108.65  
108.63  
107.80  
107.64  
104.68  
104.52

77.20  
76.99  
76.78

20.90

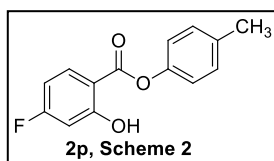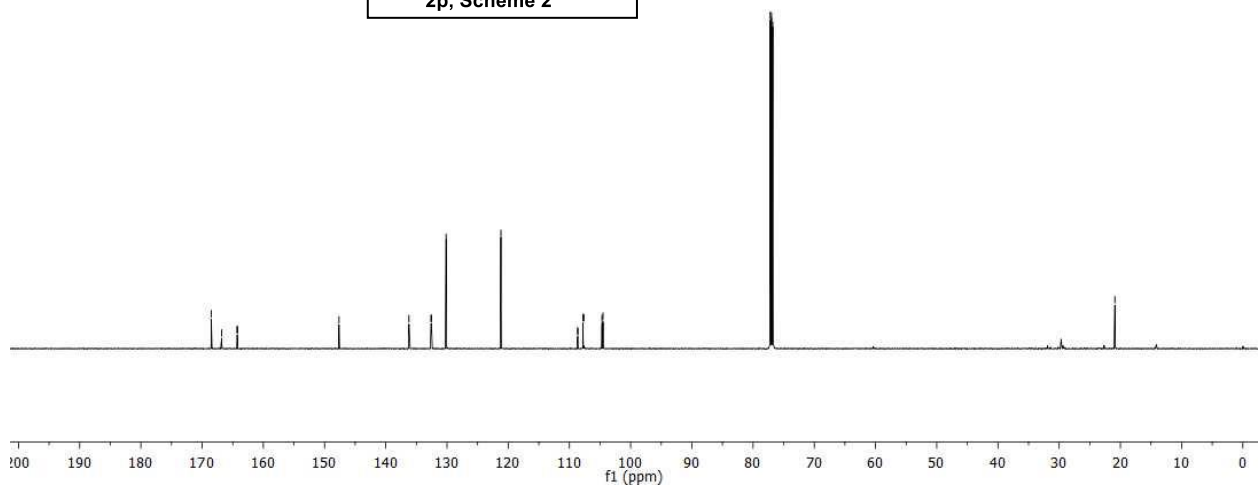

NMR DATA/AH-423 P  
 AH423 1H-NMR in CDCl<sub>3</sub>

10.722, 8.186, 8.175, 8.171, 8.168, 7.965, 7.946, 7.918, 7.906, 7.871, 7.858, 7.699, 7.695, 7.568, 7.558, 7.556, 7.547, 7.543, 7.534, 7.531, 7.365, 7.361, 7.350, 7.346, 7.275, 7.265, 6.781, 6.768, 6.764, 6.760, 6.756, 6.746, 6.742, 6.732, 6.728

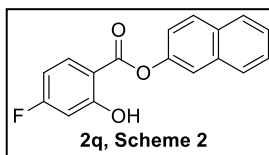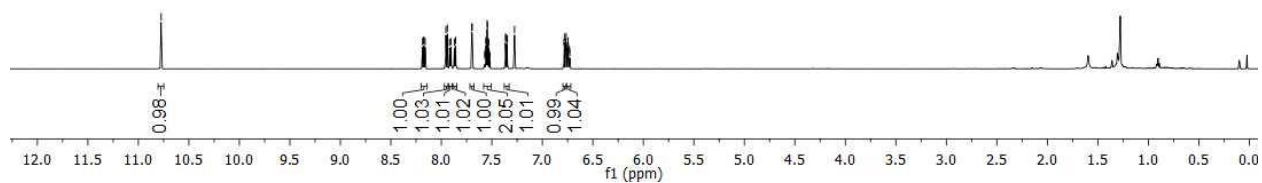

NMR DATA/AH-423 C  
 AH423 13C-NMR in CDCl<sub>3</sub>

168.51, 168.47, 166.91, 164.40, 164.31, 147.52, 133.67, 132.69, 132.62, 131.68, 129.70, 127.85, 127.69, 126.84, 126.09, 120.77, 118.75, 108.59, 108.58, 107.92, 107.77, 104.77, 104.61, 77.21, 77.00, 76.78

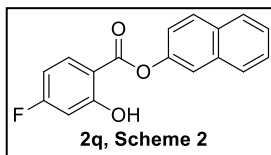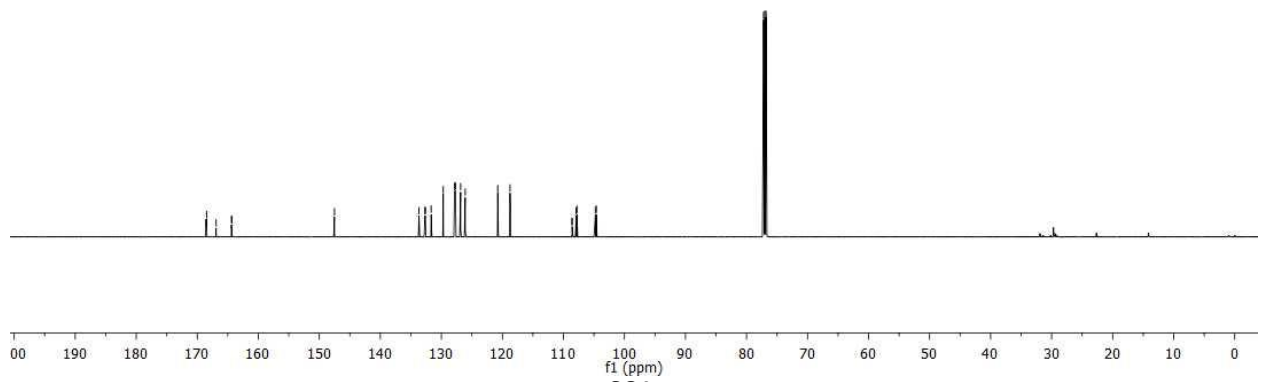



NMR DATA/AH-397 P  
AH-397 1H-NMR in CDCl<sub>3</sub>

10.624

8.032  
8.017  
7.491  
7.488  
7.478  
7.465  
7.461  
7.353  
7.341  
7.328  
7.276  
7.231  
7.229  
7.217  
7.211  
7.089  
7.085  
6.989  
6.986  
6.975  
6.972

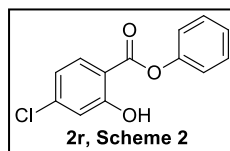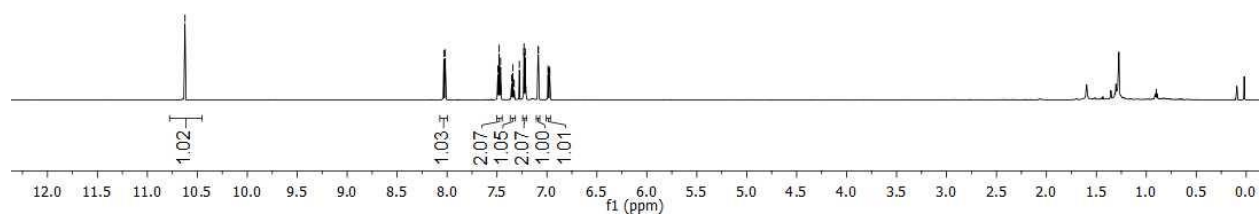

NMR DATA/AH-397 C  
AH-397 13C-NMR in CDCl<sub>3</sub>

168.37  
162.66  
149.86  
142.32  
131.31  
129.67  
126.52  
121.52  
120.21  
117.99  
110.47  
77.21  
77.00  
76.78

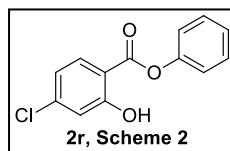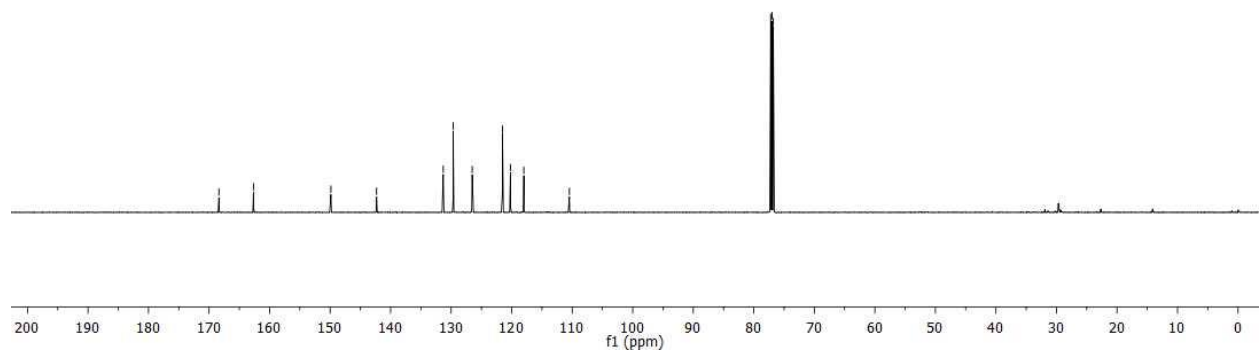

NMR DATA/AH-415 P  
AH415 1H-NMR in CDCl3

10.749

8.286  
8.282  
7.899  
7.896  
7.821  
7.818  
7.807  
7.803  
7.516  
7.504  
7.490  
7.487  
7.374  
7.362  
7.276  
7.256  
7.255  
7.242

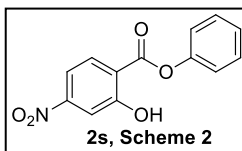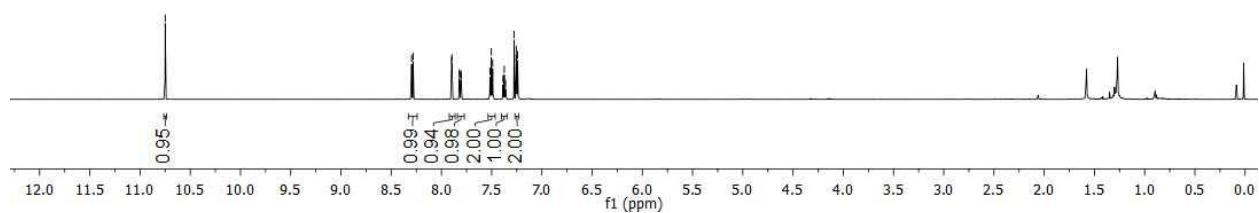

NMR DATA/AH-415 C  
AH-415 13C-NMR in CDCl3

167.65  
162.50  
152.51  
149.64  
131.69  
129.81  
126.89  
121.31  
116.65  
113.74  
113.26  
77.20  
76.98  
76.77

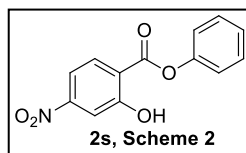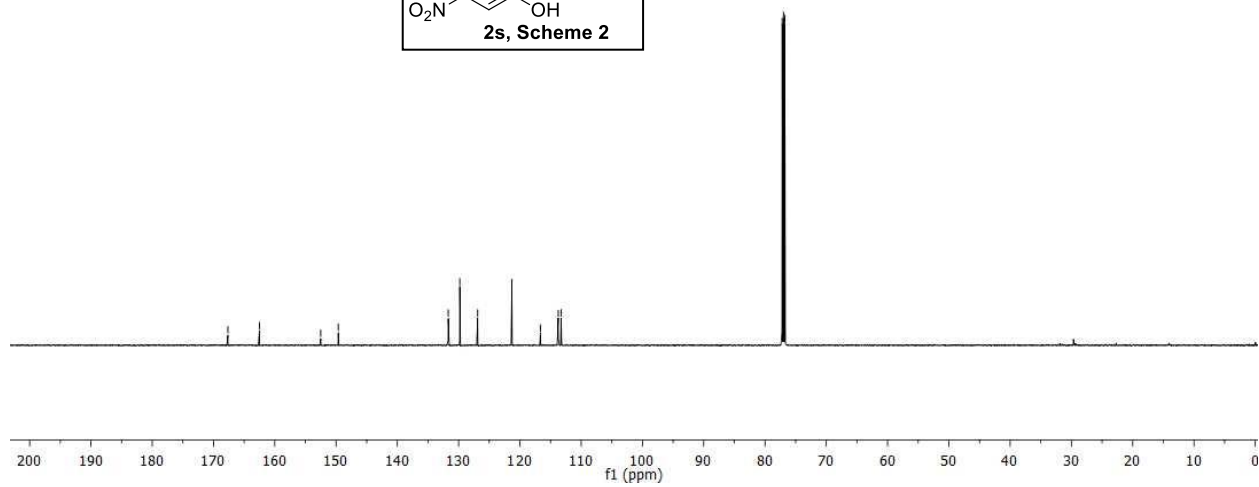

NMR DATA/AH-421 P  
AH421 1H-NMR in CDCl3

11.28

9.052  
9.048  
8.442  
8.437  
8.427  
8.422  
7.518  
7.505  
7.491  
7.388  
7.375  
7.363  
7.276  
7.263  
7.250  
7.185  
7.169

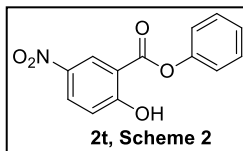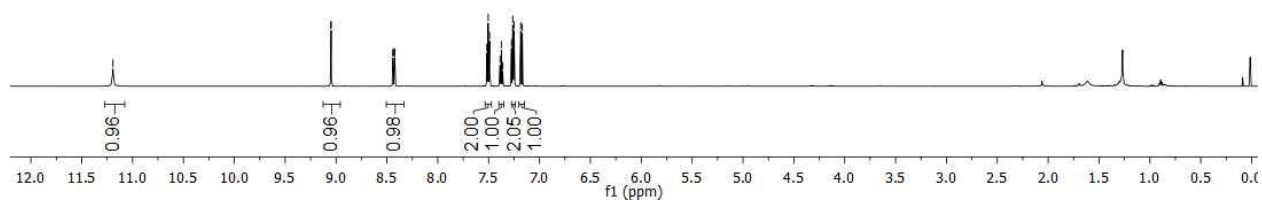

NMR DATA/AH-421 C  
AH421 13C-NMR in CDCl3

167.73  
166.63

149.55

140.18

131.13

129.81

127.04

126.92

121.31

118.93

111.69

77.21  
77.00  
76.78

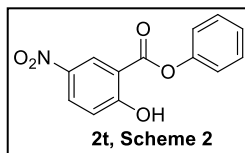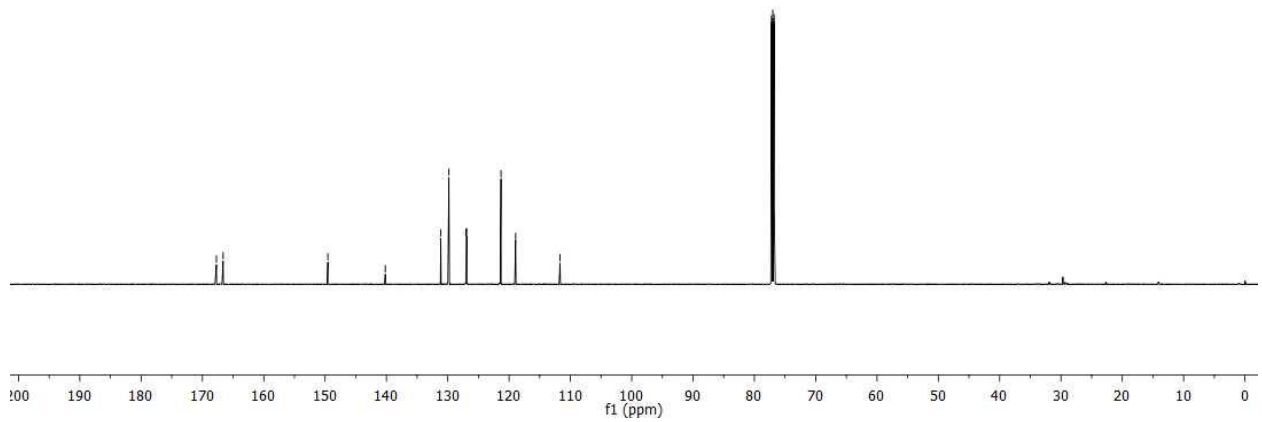

NMR DATA/AH-430 P  
AH430 1H-NMR in CDCl3

11.05

9.024  
9.020  
8.449  
8.444  
8.434  
8.429  
7.481  
7.476  
7.473  
7.464  
7.461  
7.456  
7.276  
7.227  
7.222  
7.219  
7.211  
7.207  
7.202  
7.192  
7.177

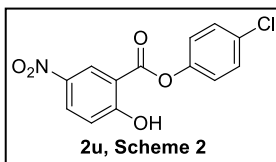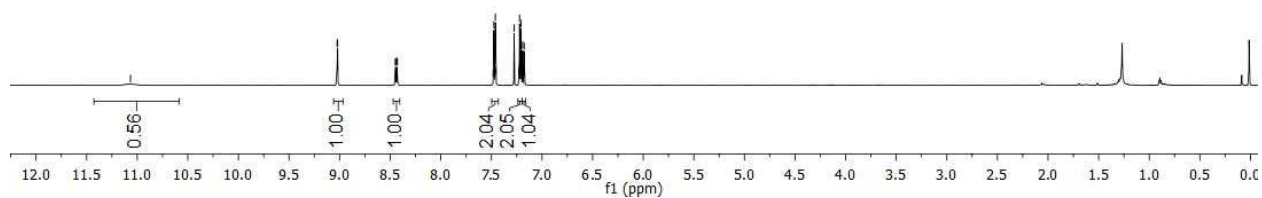

NMR DATA/AH-430 C  
AH430 13C-NMR in CDCl3

167.43  
166.60

147.95  
140.22  
132.46  
131.30  
129.89  
126.99  
122.73  
119.02  
111.39

77.20  
76.99  
76.77

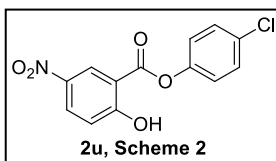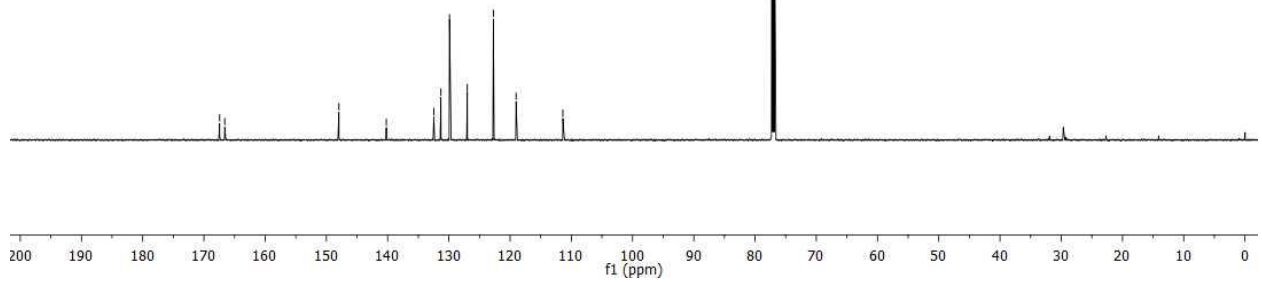

NMR DATA/AH-554 P  
AH-554 1H-NMR in

8.346  
8.343  
8.333  
8.330  
7.873  
7.872  
7.859  
7.858  
7.541  
7.538  
7.527  
7.515  
7.513  
7.490  
7.486  
7.477  
7.476  
7.466  
7.463  
7.460  
7.363  
7.361  
7.350  
7.338  
7.336  
7.334  
7.321  
7.309  
7.302  
7.301  
7.288  
7.276

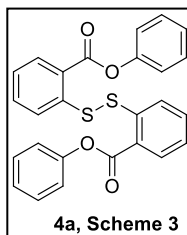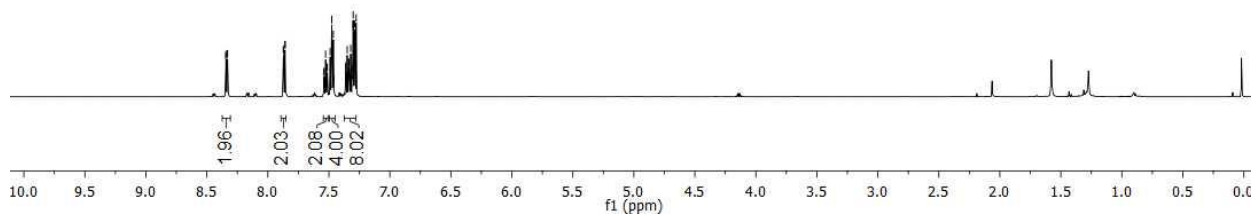

NMR DATA/AH-554 C  
AH-554 13C-NMR in CDCl3

164.94  
150.58  
141.38  
133.71  
132.05  
129.55  
126.58  
126.14  
126.07  
125.68  
121.71  
77.20  
76.99  
76.78

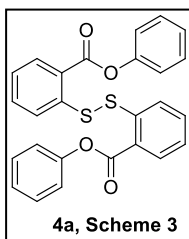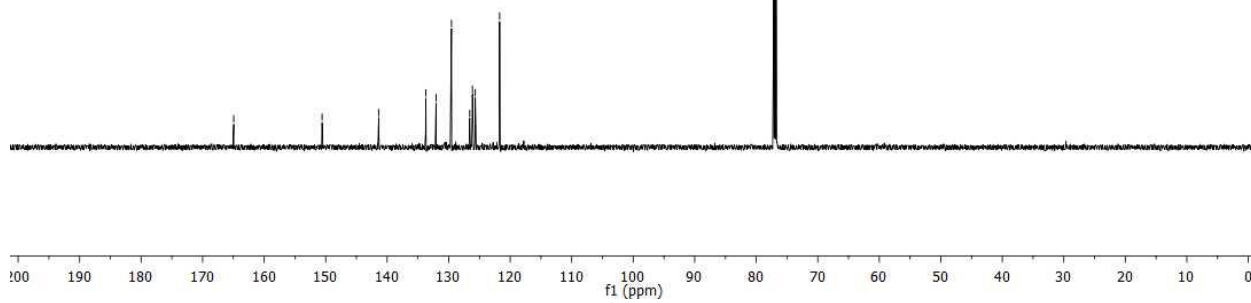

NMR DATA/AH-569 P  
AH-569 1H-NMR in CDCl<sub>3</sub>

8.336  
8.377  
8.372  
8.362  
7.561  
7.557  
7.545  
7.541  
7.478  
7.464  
7.451  
7.325  
7.313  
7.300  
7.272  
7.260  
7.046  
7.041  
7.033  
7.031  
7.029  
7.027  
7.019  
7.015

-1.548

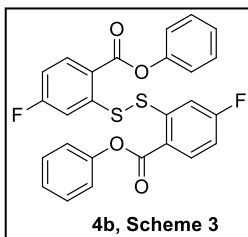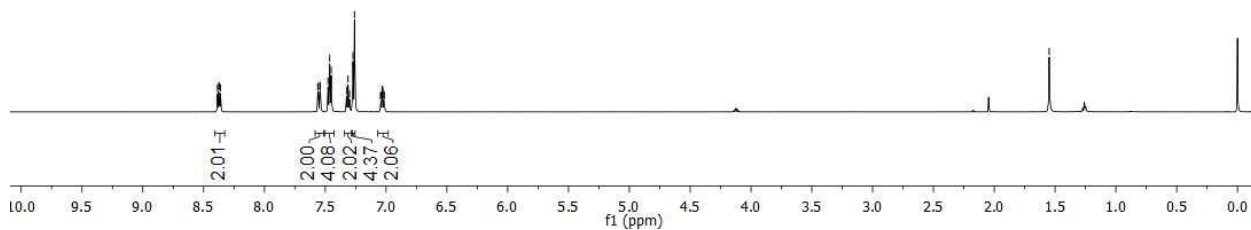

NMR DATA/AH-569 C  
AH-569 13C-NMR in CDCl<sub>3</sub>

167.00  
165.29  
164.15  
150.42  
144.81  
144.75  
134.88  
134.82  
129.59  
126.26  
122.78  
122.76  
121.66  
113.48  
113.33  
113.17  
112.99

77.19  
76.08  
76.77

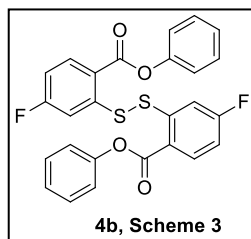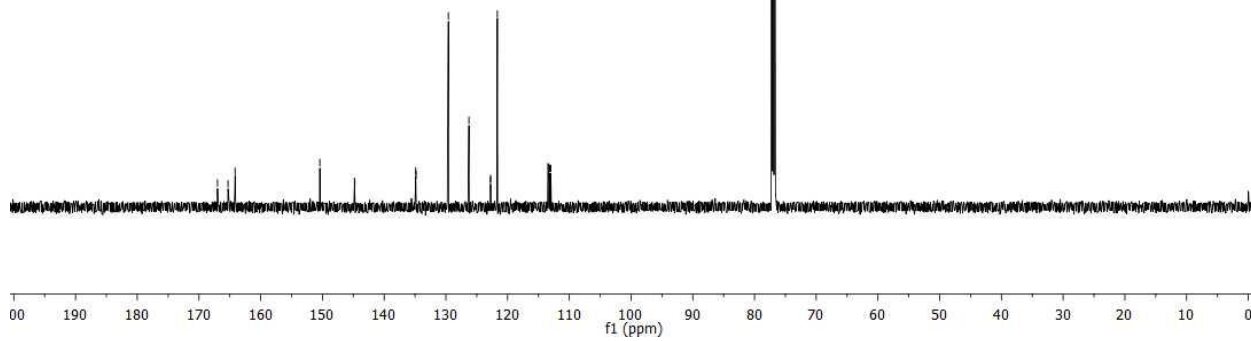

S70

NMR DATA/AH-564 P  
AH-564 1H-NMR in CDCl<sub>3</sub>

8.319  
8.317  
8.306  
8.304  
7.853  
7.839  
7.543  
7.541  
7.529  
7.517  
7.515  
7.442  
7.427  
7.362  
7.350  
7.337  
7.276  
7.250  
7.236

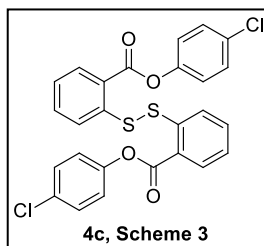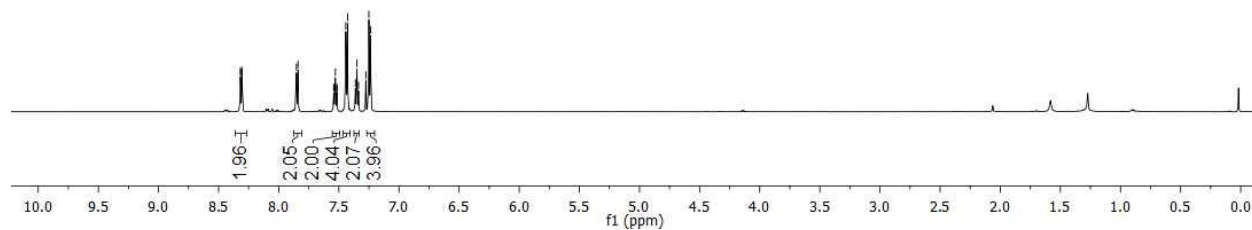

NMR DATA/AH-564 C  
AH-564 13C-NMR in CDCl<sub>3</sub>

164.63  
149.01  
141.43  
133.90  
132.09  
131.57  
129.60  
126.21  
126.09  
125.78  
123.09  
77.21  
77.00  
76.78

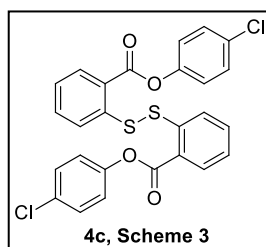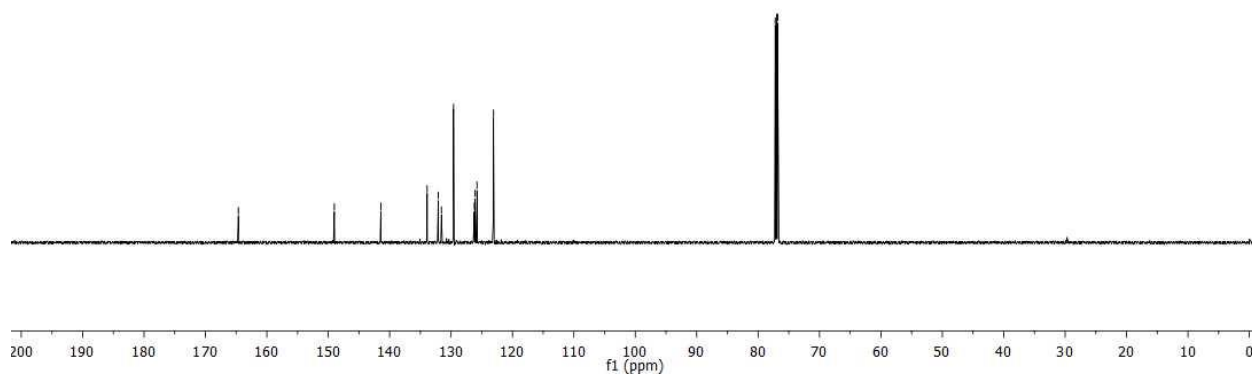

NMR DATA/AH-565 P  
AH-565 1H-NMR in CDCl<sub>3</sub>

8.329  
8.327  
8.316  
8.314  
7.860  
7.847  
7.846  
7.527  
7.525  
7.513  
7.501  
7.499  
7.350  
7.349  
7.336  
7.325  
7.323  
7.276  
7.269  
7.255  
7.175  
7.160

-2.404

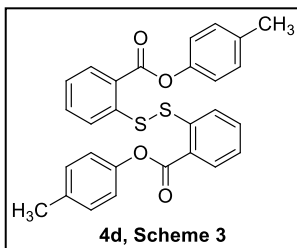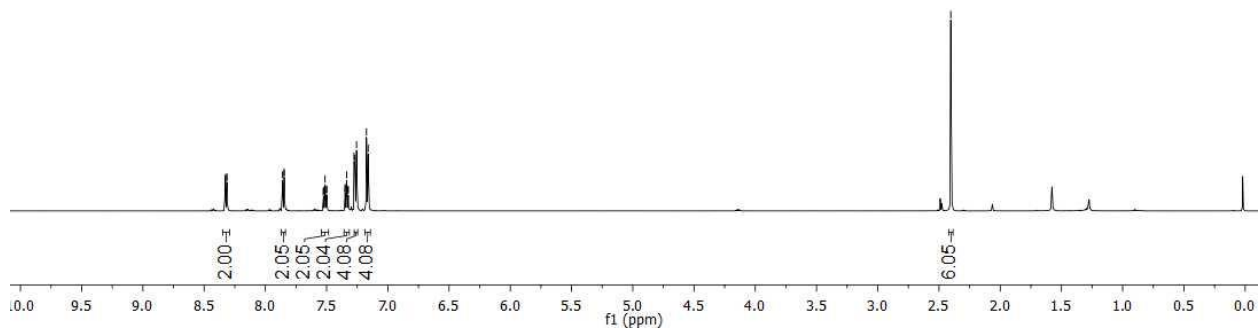

NMR DATA/AH-565 C  
AH-565 13C-NMR in CDCl<sub>3</sub>

165.13  
148.34  
141.32  
135.80  
133.62  
132.00  
130.03  
126.69  
126.06  
125.63  
121.35

77.20  
76.99  
76.78

-20.90

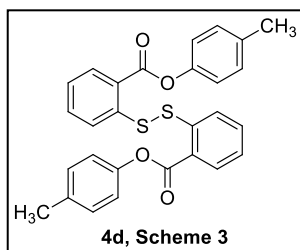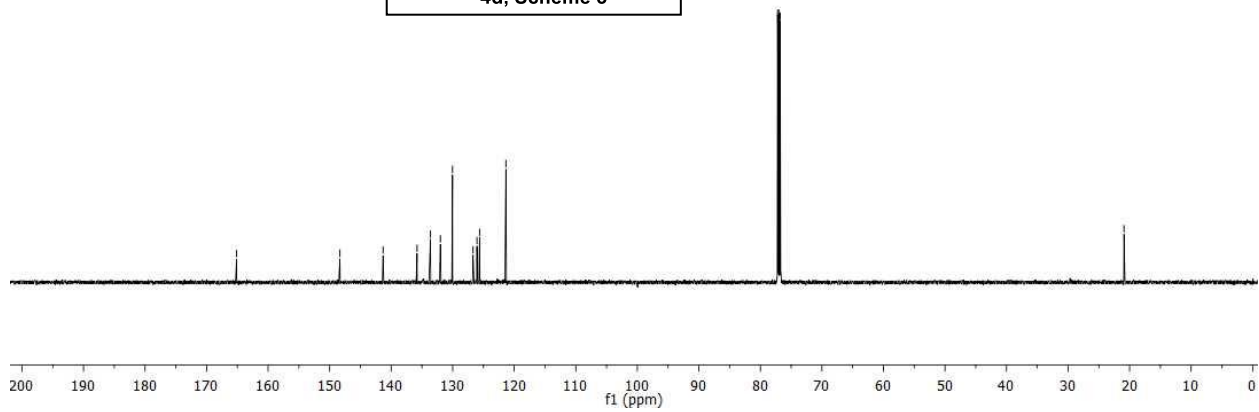



NMR DATA/AH-572 P  
AH-572 1H-NMR in CDCl<sub>3</sub>

8.456  
8.452  
7.693  
7.678  
7.634  
7.630  
7.619  
7.616  
7.497  
7.484  
7.483  
7.470  
7.349  
7.337  
7.324  
7.287  
7.285  
7.276  
7.272

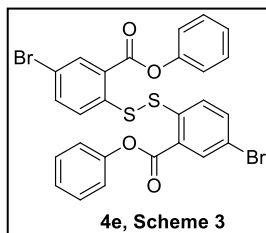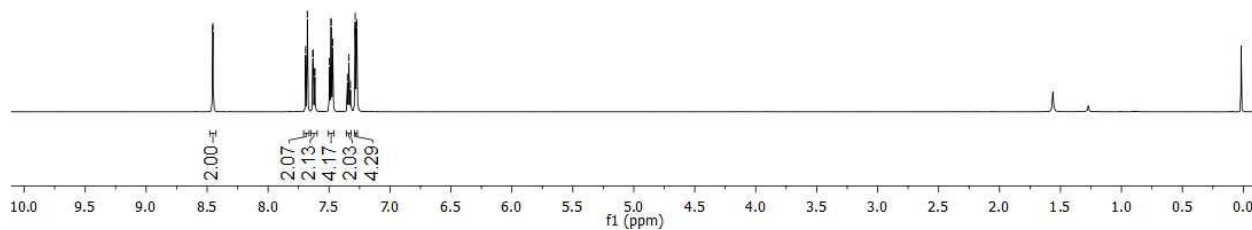

NMR DATA/AH-572 C  
AH-572 13C-NMR in CDCl<sub>3</sub>

163.79  
150.30  
140.14  
136.56  
134.67  
129.64  
128.04  
127.69  
126.41  
121.54  
119.61  
77.20  
76.98  
76.77

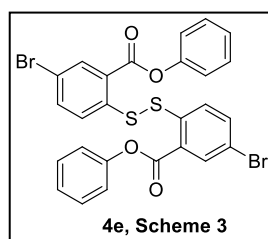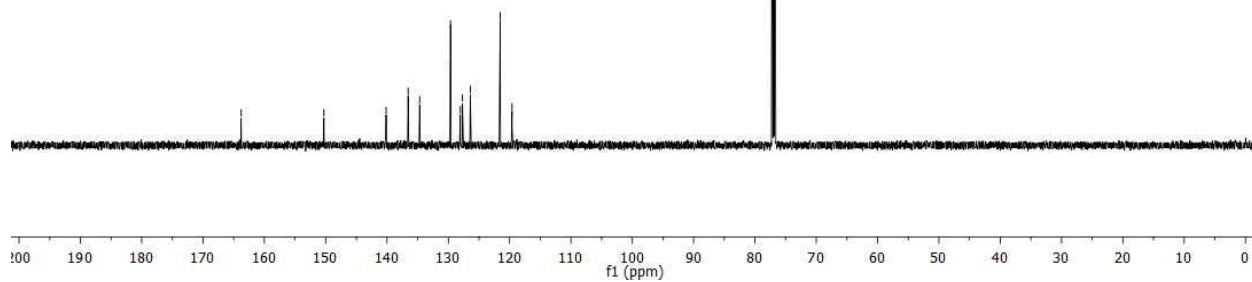

NMR DATA/AH-576 C  
 AH-576 1H-NMR in CDCl3  
 8.022  
 8.014  
 8.011  
 7.894  
 7.887  
 7.779  
 7.479  
 7.475  
 7.466  
 7.455  
 7.452  
 7.330  
 7.318  
 7.305  
 7.273  
 7.271  
 7.265  
 7.259  
 7.253  
 7.250  
 7.248  
 7.246  
 7.238  
 7.233

-1.562

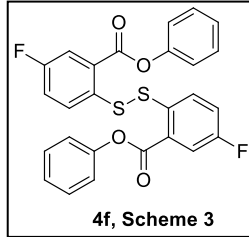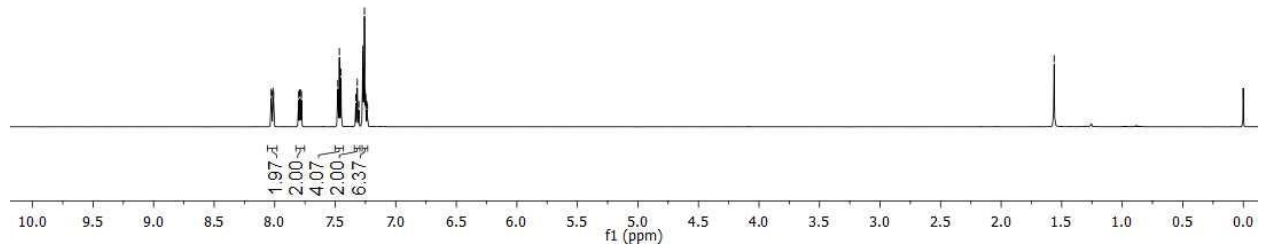

NMR DATA/AH-576 C  
 AH-576 13C-NMR in CDCl3

163.91  
 163.90  
 161.58  
 159.94  
 150.33  
 136.22  
 136.20  
 129.63  
 128.02  
 127.97  
 127.88  
 127.84  
 126.38  
 121.54  
 121.28  
 121.13  
 118.82  
 118.66  
 77.20  
 76.99  
 76.78

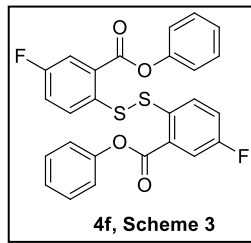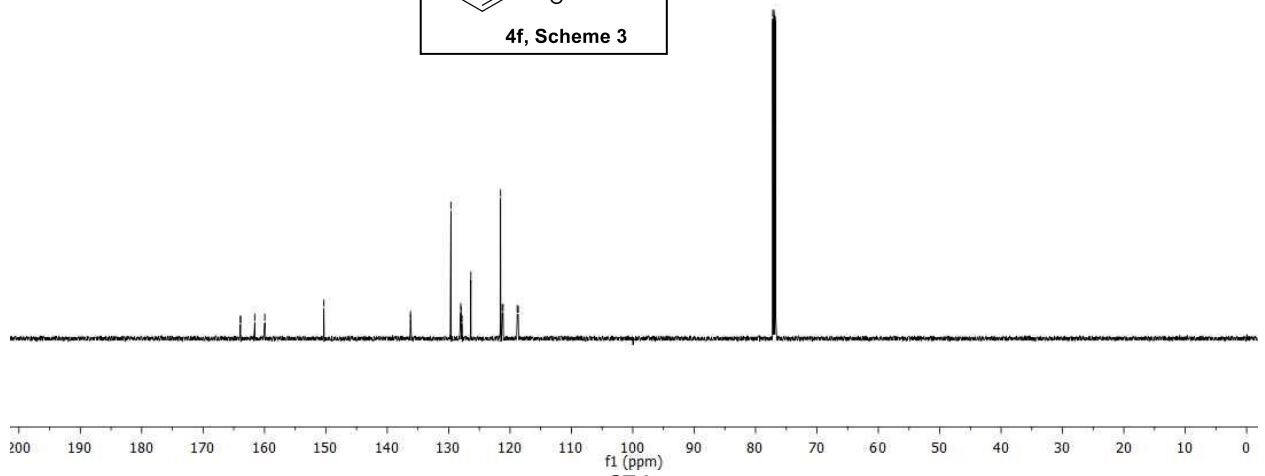

NMR DATA/AH-584 P  
AH-584 1H-NMR in CDCl<sub>3</sub>

8.300  
8.287  
7.478  
7.464  
7.451  
7.429  
7.426  
7.415  
7.413  
7.402  
7.398  
7.386  
7.323  
7.311  
7.298  
7.276  
7.273  
7.262  
7.259  
7.255  
7.252  
7.249  
7.243  
4.782

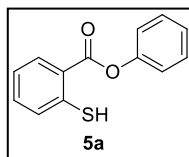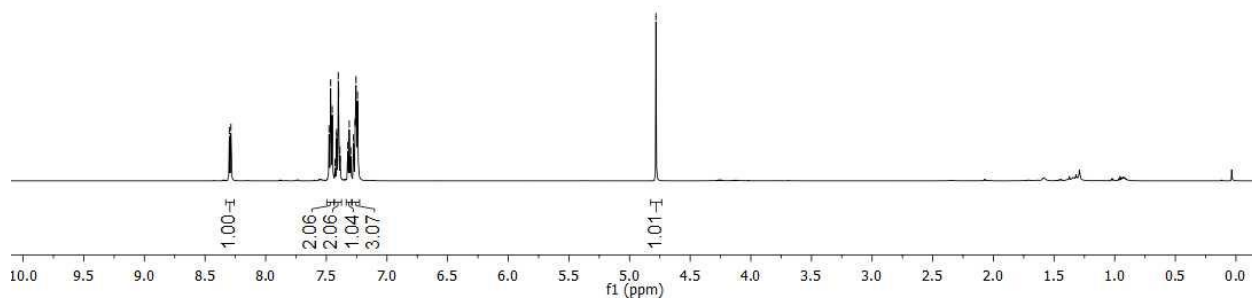

NMR DATA/AH-584 C  
AH-584 13C-NMR in CDCl<sub>3</sub>

165.28  
150.62  
139.53  
133.08  
132.23  
131.06  
129.52  
126.05  
125.00  
124.80  
121.76  
77.26  
77.05  
76.83

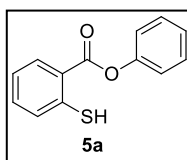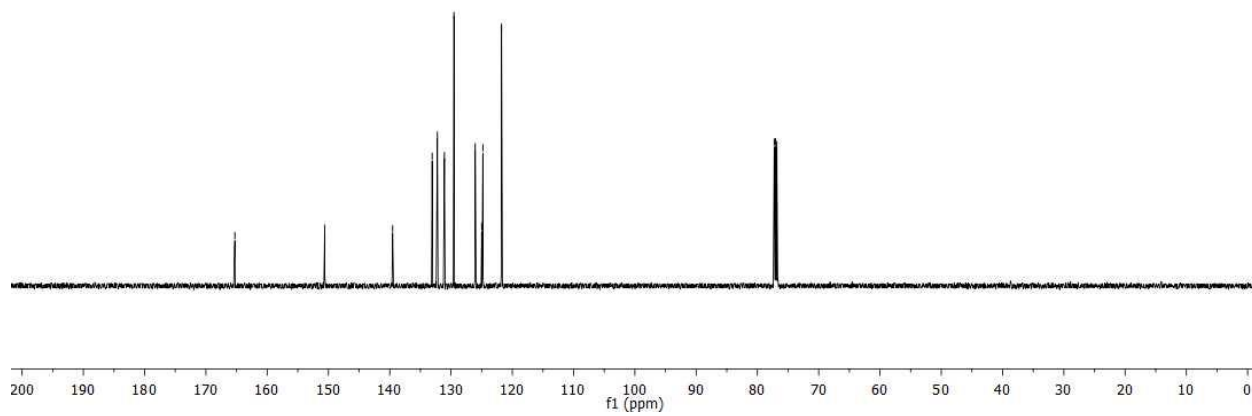

NMR DATA/AH-583 P  
AH-583 1H-NMR in DMSO

7.798  
7.786  
7.512  
7.499  
7.487  
6.952  
6.938  
6.926  
6.913  
6.901

-2.501

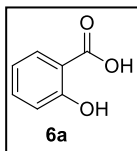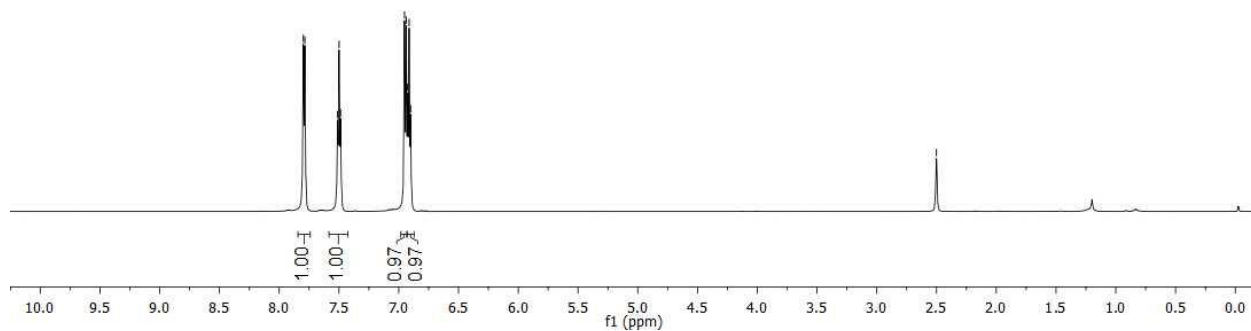

NMR DATA/AH-583 C  
AH-583 13C-NMR in DMSO

-172.87

-161.56

-136.06

-130.68

-119.58

-117.50

-113.29

40.30  
40.16  
40.02  
39.88  
39.74  
39.61  
39.47

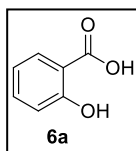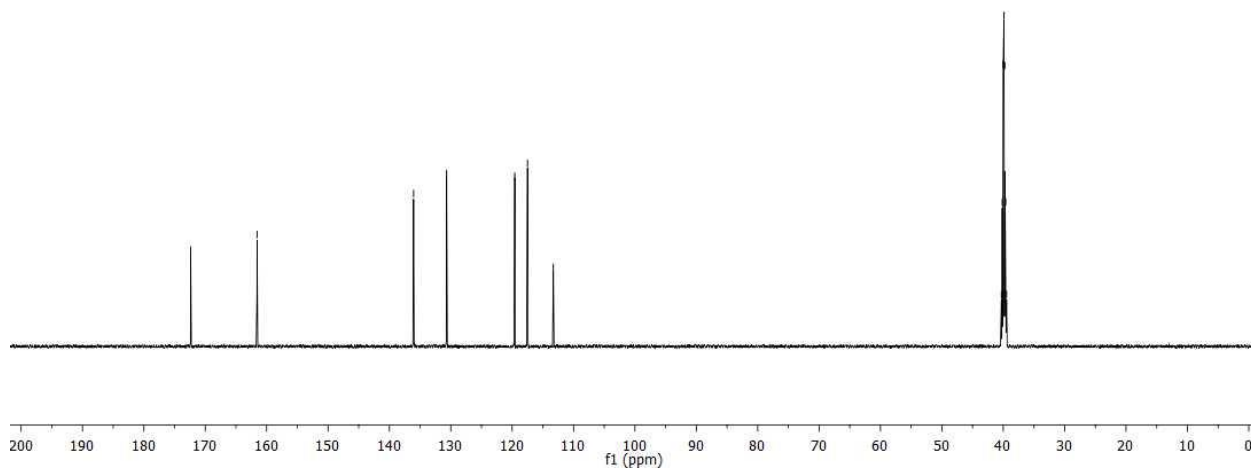

Supplement: c6ob01758d1.pdf [file c6ob01758d1.pdf]
